# Supplementary material for: Monthly element ∕ Ca trends and inter chamber variability in two planktic Foraminifera species: Globigerinoides ruber albus and Turborotalita clarkei from a hypersaline oligotrophic sea
Source: Copernicus journal article supplement (doi:10.5194/bg-23-1065-2026), 2026-02-05
Supplement: Supplementary file 1 [file Levy et al., Supplementary file_A.pdf › Levy et al., Supplementary file_A.pdf]

Supplementary file for:  
“Monthly element/Ca trends and inter chamber variability in two planktic Foraminifera  
species: *Globigerinoides ruber albus* and *Turborotalita clarkei* from a hypersaline  
oligotrophic sea”

Noy Levy, Adi Torfstein, Ralf Schiebel, Natalie Chernihovsky, Klaus Peter Jochum, Ulrike  
Weis, Brigitte Stoll, Gerald H. Haug

**Tables:**

**Table S1:** RSD (relative standard deviation; %) for each element and respective isotope measured using LA-ICP-MS, calculated based on the measurements of the reference material MACS-3 and NIST-612 (Jochum et al., 2019).

**Table S2:** Spearman correlation matrix p-values for element-Ca ratio means of *G. ruber albus*, *T. clarkei* ‘big’ and *T. clarkei* ‘encrusted’. Mg/Ca, Sr/Ca, B/Ca, Na/Ca, Al/Ca and Fe/Ca units are mmol/mol; Ti/Ca, Mn/Ca, Co/Ca, Ba/Ca, Nd/Ca, Pb/Ca and Th/Ca units are  $\mu\text{mol/mol}$ ; and U/Ca units is nmol/mol.

**Table S3:** p-values for element-Ca ratio standard deviation of *G. ruber albus*, *T. clarkei* ‘big’ and *T. clarkei* ‘encrusted’. Mg/Ca, Sr/Ca, B/Ca, Na/Ca, Al/Ca and Fe/Ca are mmol/mol; Ti/Ca, Mn/Ca, Co/Ca, Ba/Ca, Nd/Ca, Pb/Ca and Th/Ca are  $\mu\text{mol/mol}$ ; and U/Ca is nmol/mol.

**Table S4:** Single chamber LA-ICP-MS measured element-Ca ratios, specimen means and standard deviations for *G. ruber albus*, *T. clarkei* ‘big’ and *T. clarkei* ‘encrusted’.

## Figures:

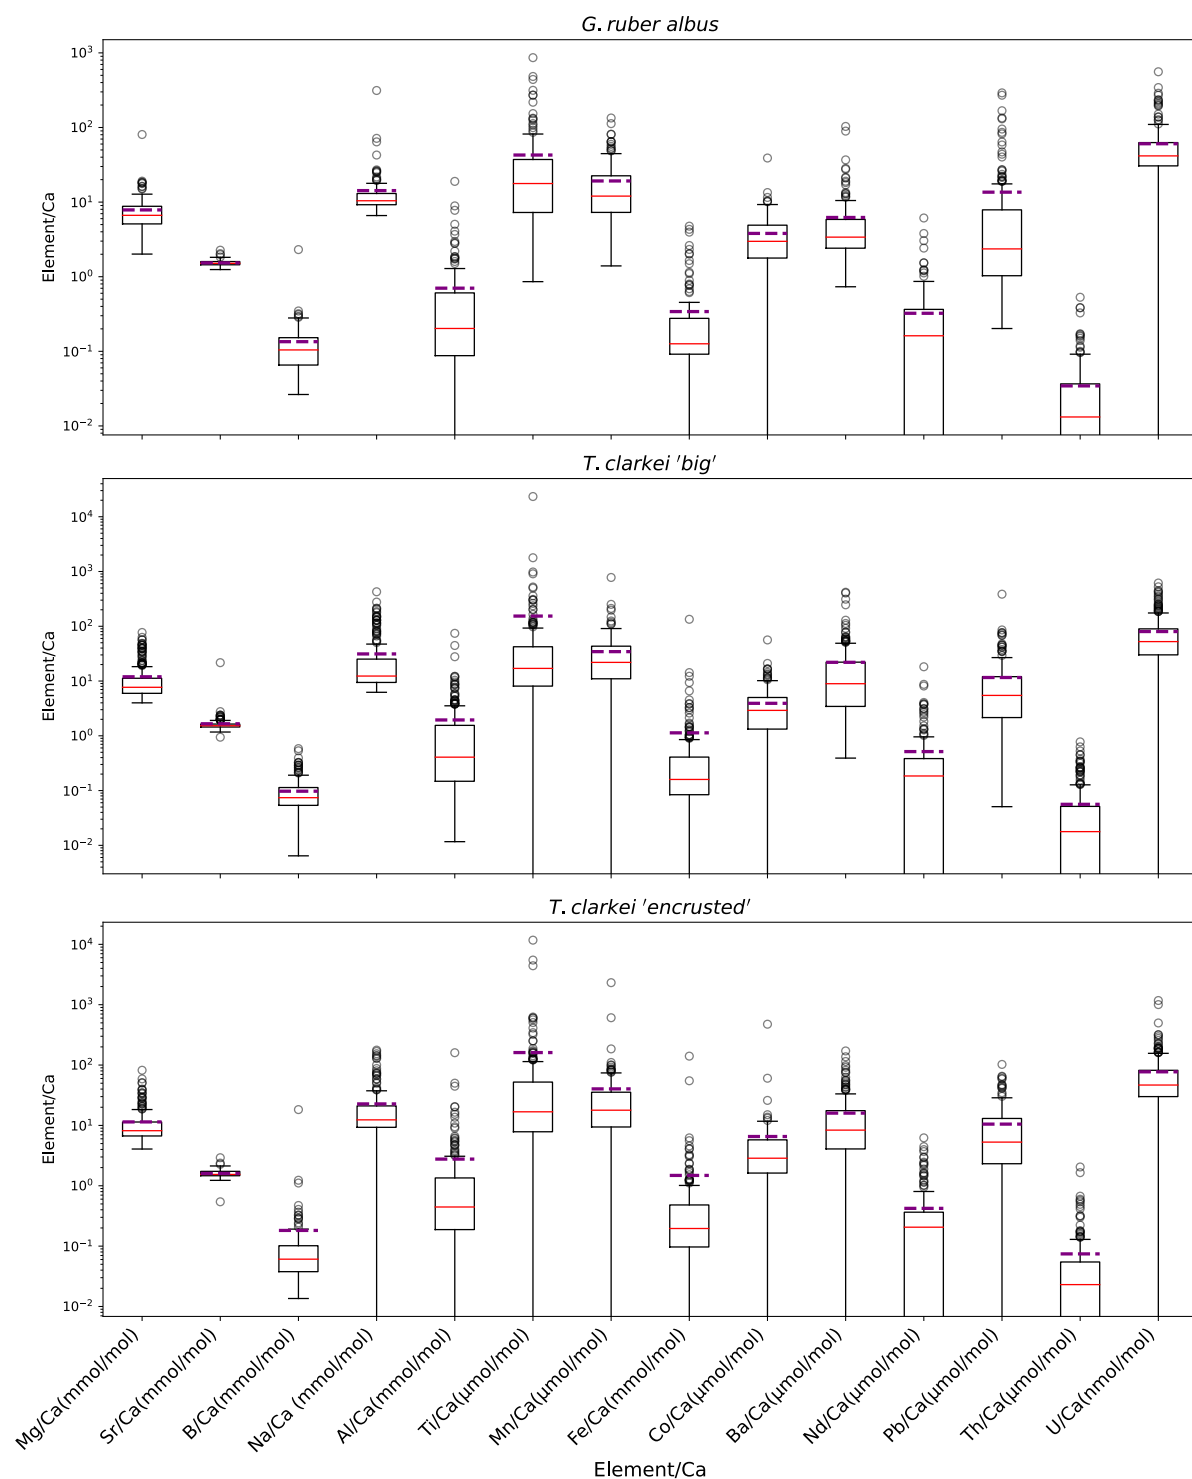

**Figure S1:** Range, Median (red line), Mean values (dashed purple line), of the calcium-normalized element ratios of *G. ruber albus*, *T. clarkei* 'big' and *T. clarkei* 'encrusted' shells, derived from sediment traps from the Gulf of Aqaba between June 2014 and June 2015. Y-axis in logarithmic scale.

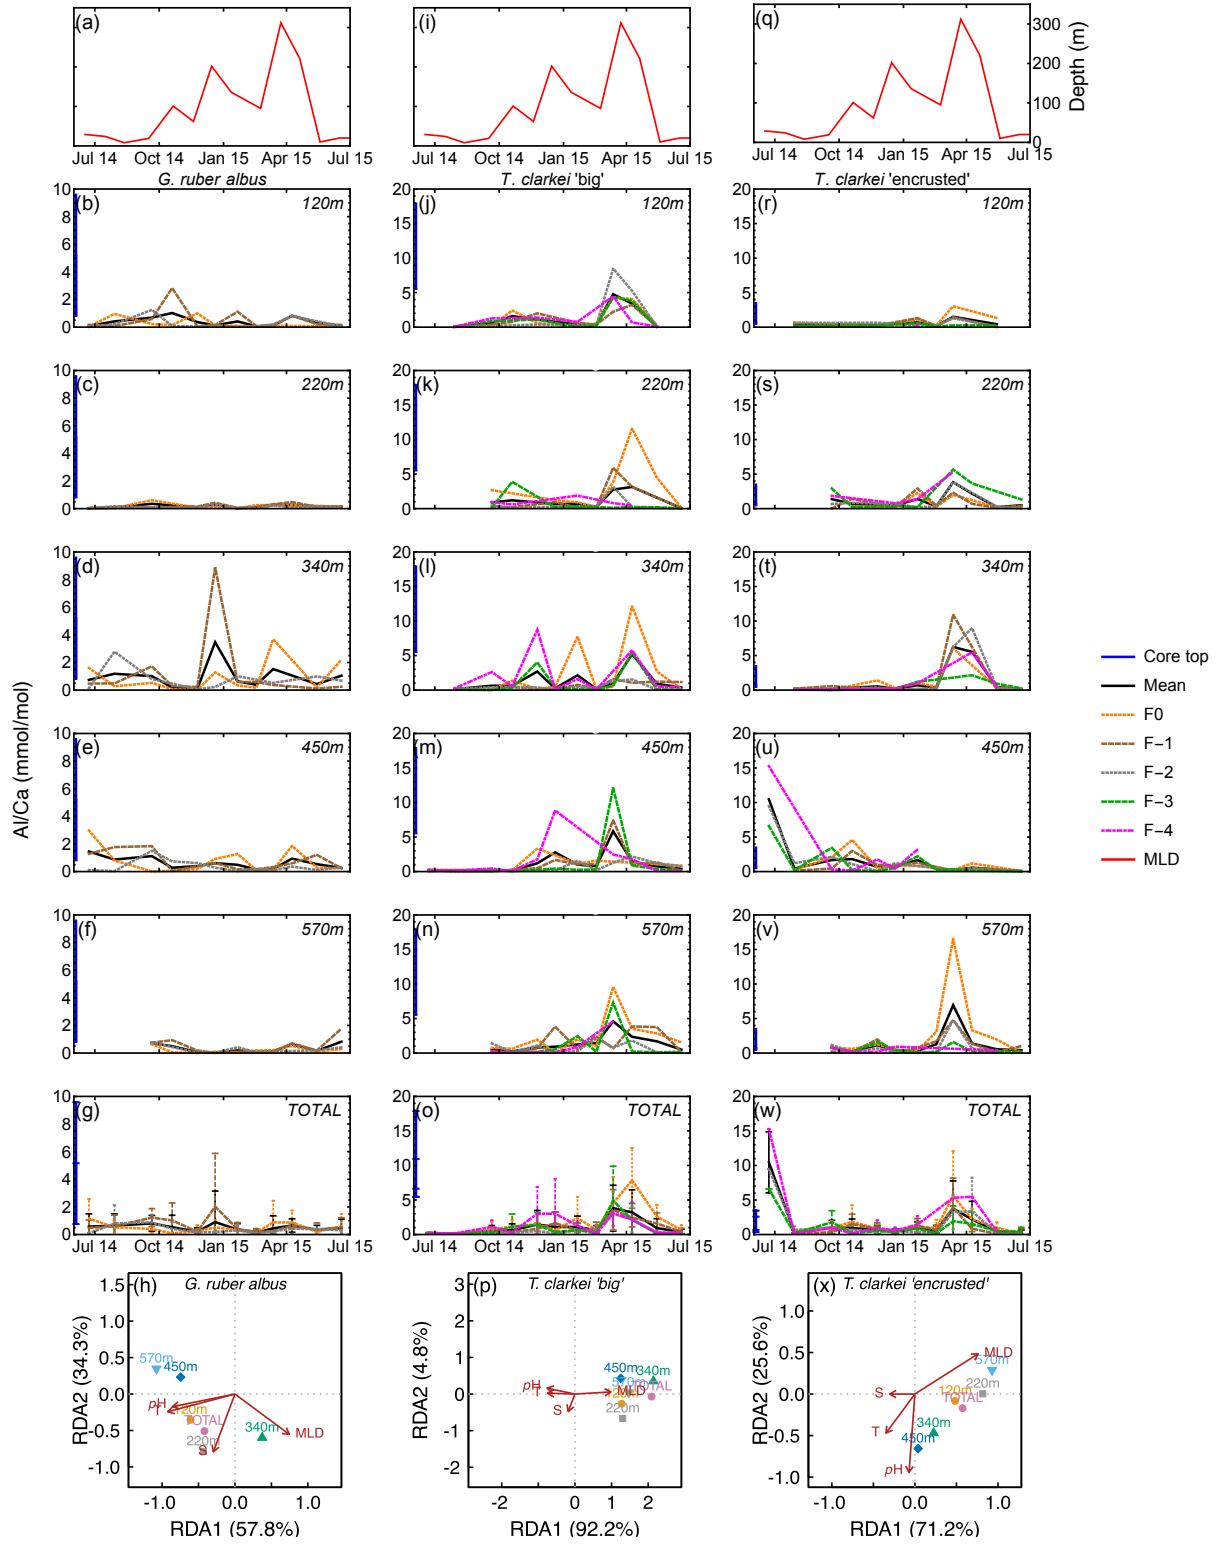

**Figure S2:** Time series of Al/Ca values measured from the shells of *G. ruber albus* (b-f), *T. clarkei* 'big' (j-n) and *T. clarkei* 'encrusted' (r-v), derived from sediment traps located at different water depths (120-570 m). Al/Ca of core top are marked by a blue bar along the left y-axes. Top panels a, i, and q show the depth (meters below surface layer) of the mixed layer depth (MLD). Panels g, o, and w represent the average values of all depths for each chamber for each species. Panels h, p and x show the redundancy analysis (RDA) per species for each water depth with MLD depth, temperature, salinity and pH as explanatory variables.

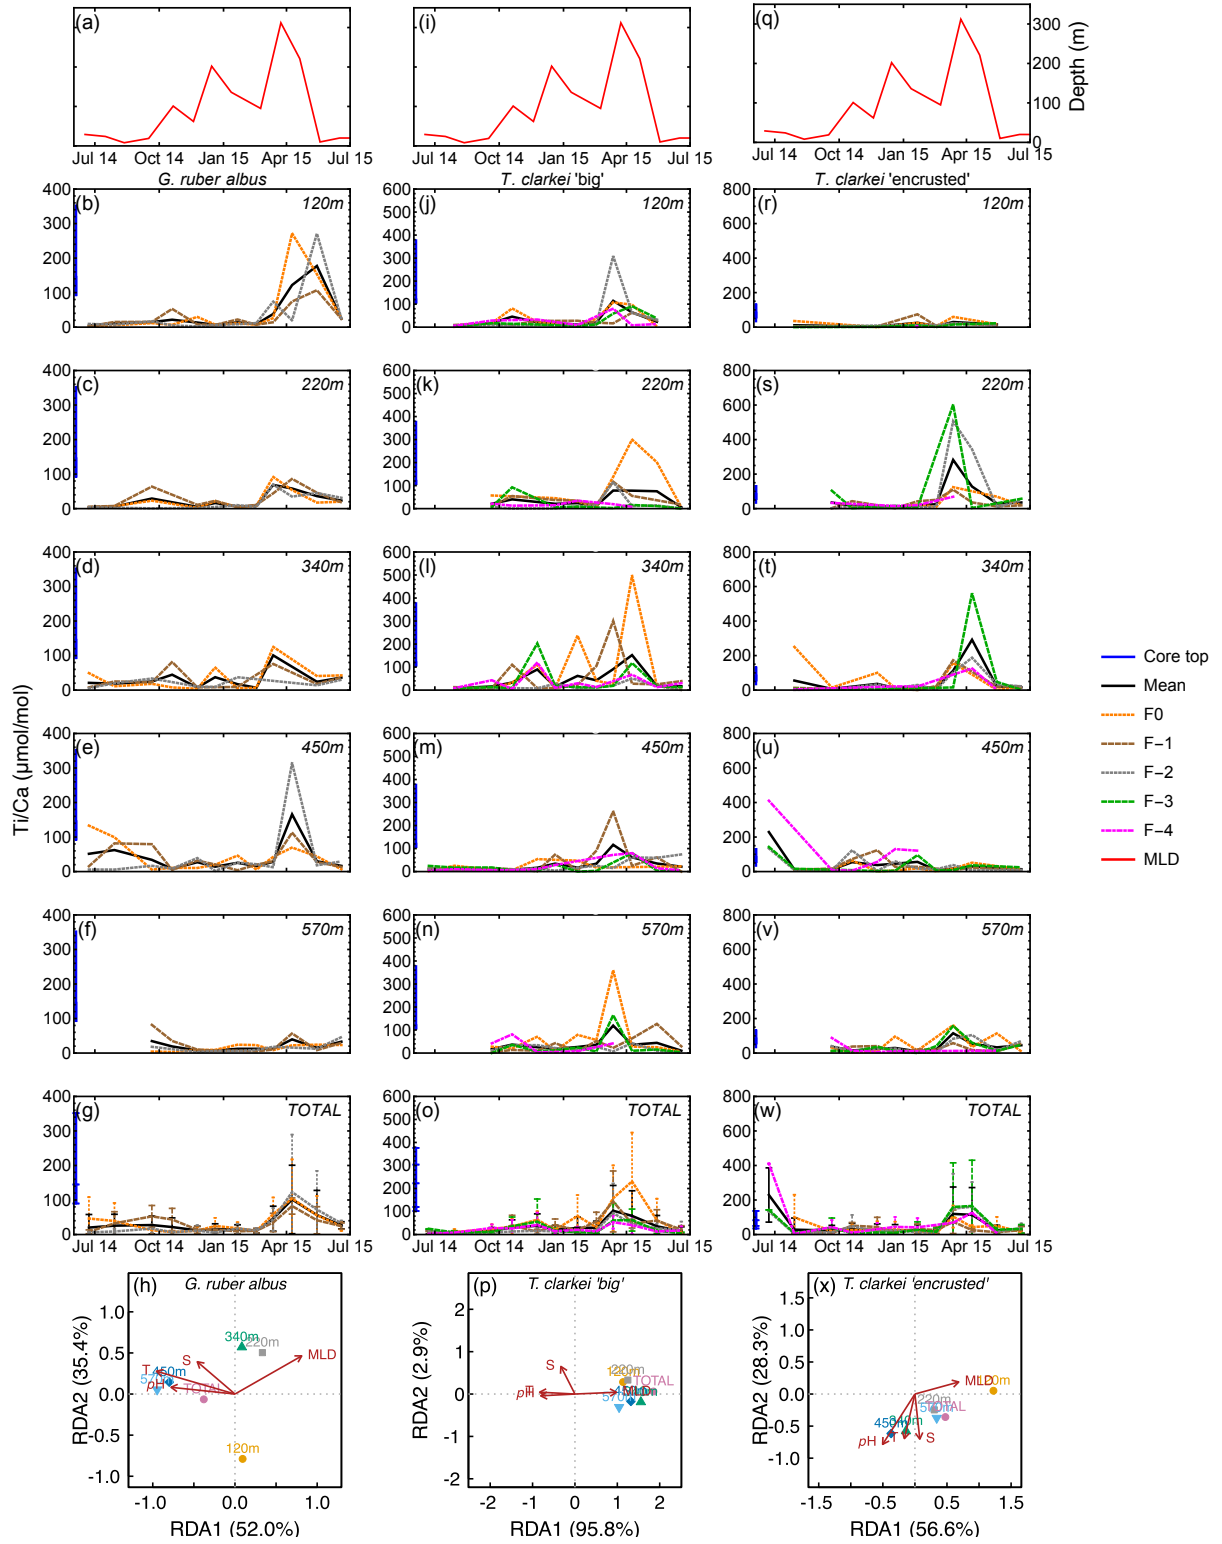

**Figure S3:** Time series of Ti/Ca values measured from the shells of *G. ruber albus* (b-f), *T. clarkei* 'big' (j-n) and *T. clarkei* 'encrusted' (r-v), derived from sediment traps located at different water depths (120-570 m). Ti/Ca of core top are marked by a blue bar along the left y-axes. Top panels a, i, and q show the depth (meters below surface layer) of the mixed layer depth (MLD). Panels g, o, and w represent the average values of all depths for each chamber for each species. Panels h, p and x show the redundancy analysis (RDA) per species for each water depth with MLD depth, temperature, salinity and pH as explanatory variables.

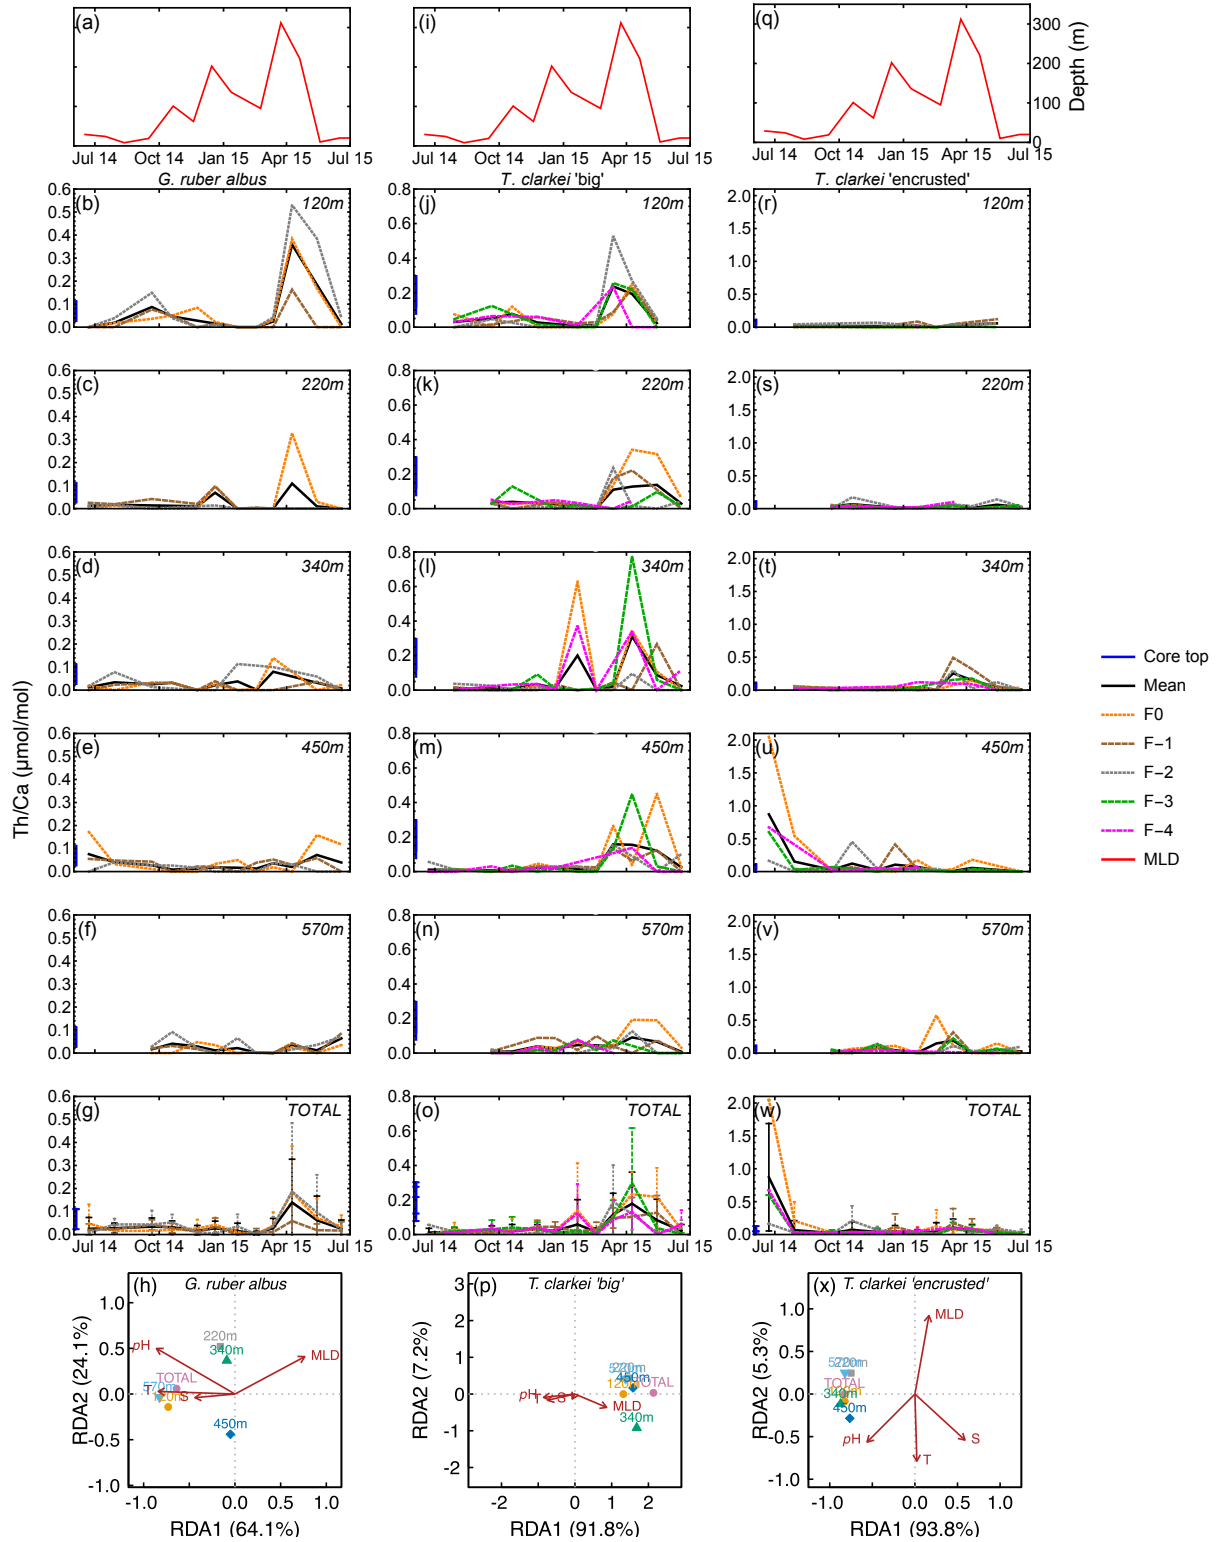

**Figure S4:** Time series of Th/Ca values measured from the shells of *G. ruber albus* (b-f), *T. clarkei* 'big' (j-n) and *T. clarkei* 'encrusted' (r-v), derived from sediment traps located at different water depths (120-570 m). Th/Ca of core top are marked by a blue bar along the left y-axes. Top panels a, i, and q show the depth (meters below surface layer) of the mixed layer depth (MLD). Panels g, o, and w represent the average values of all depths for each chamber for each species. Panels h, p and x show the redundancy analysis (RDA) per species for each water depth with MLD depth, temperature, salinity and pH as explanatory variables. *G. ruber albus* display a peak during spring months accompanied with more ICV. *T. clarkei* 'big' show similar trends to *G. ruber albus* albite with higher ICV during spring. *T. clarkei* 'encrusted' exhibit spring-ICV in the upper water column while with depth, there are ICV throughout the year.

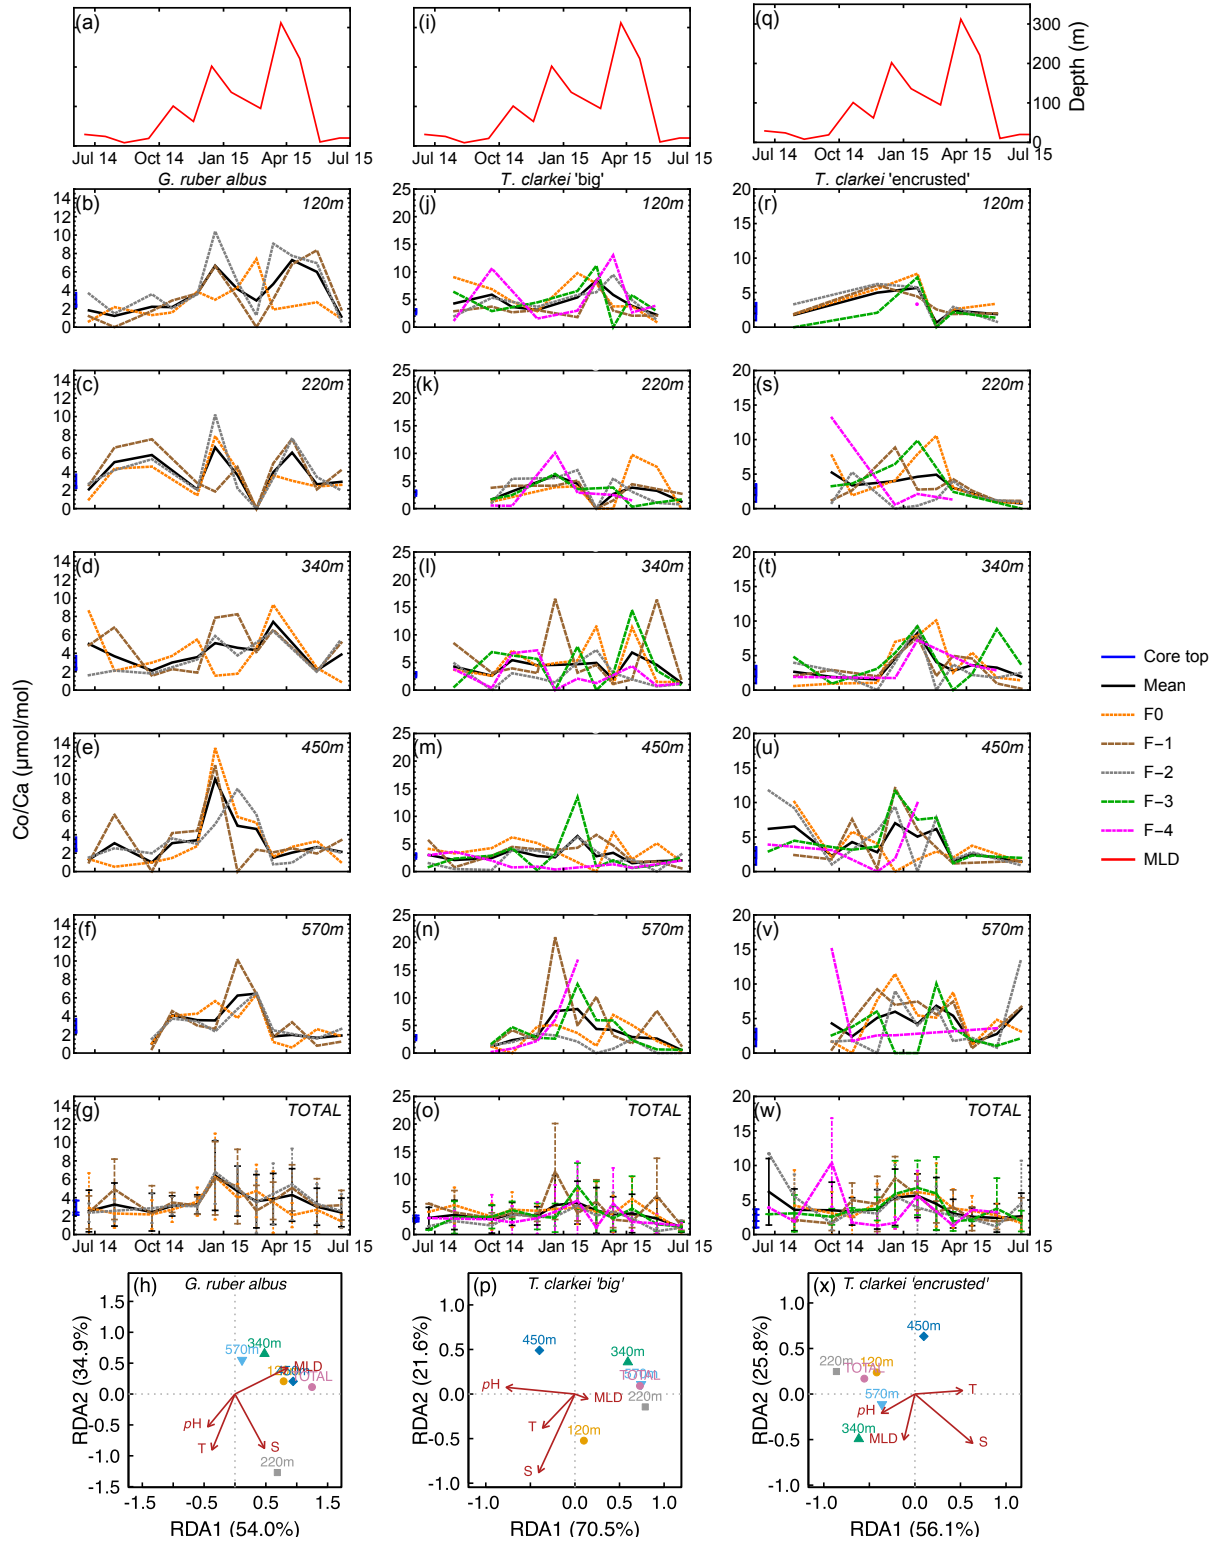

**Figure S5:** Time series of Co/Ca values measured from the shells of *G. ruber albus* (b-f), *T. clarkei* 'big' (j-n) and *T. clarkei* 'encrusted' (r-v), derived from sediment traps located at different water depths (120-570 m). Co/Ca of core top are marked by a blue bar along the left y-axes. Top panels a, i, and q show the depth (meters below surface layer) of the mixed layer depth (MLD). Panels g, o, and w represent the average values of all depths for each chamber for each species. Panels h, p and x show the redundancy analysis (RDA) per species for each water depth with MLD depth, temperature, salinity and pH as explanatory variables.

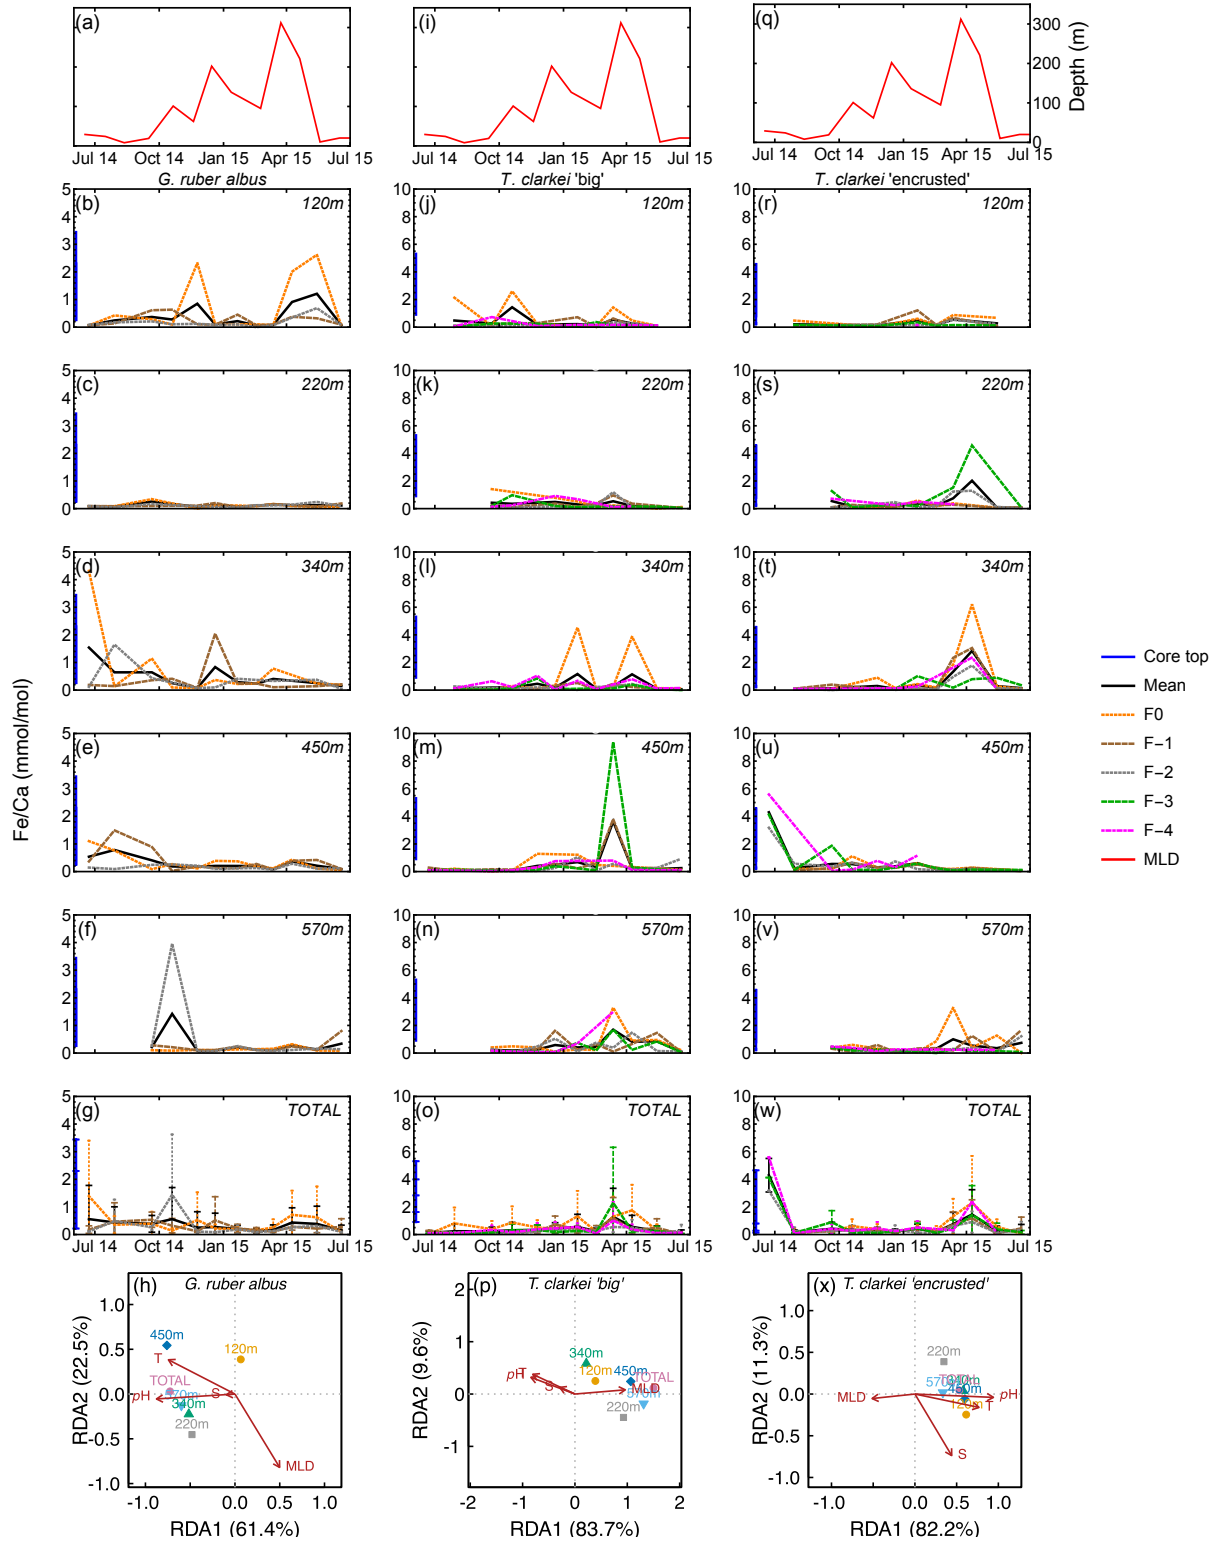

**Figure S6:** Time series of Fe/Ca values measured from the shells of *G. ruber albus* (b-f), *T. clarkei* 'big' (j-n) and *T. clarkei* 'encrusted' (r-v), derived from sediment traps located at different water depths (120-570 m). Fe/Ca of core top are marked by a blue bar along the left y-axes. Top panels a, i, and q show the depth (meters below surface layer) of the mixed layer depth (MLD). Panels g, o, and w represent the average values of all depths for each chamber for each species. Panels h, p and x show the redundancy analysis (RDA) per species for each water depth with MLD depth, temperature, salinity and pH as explanatory variables.

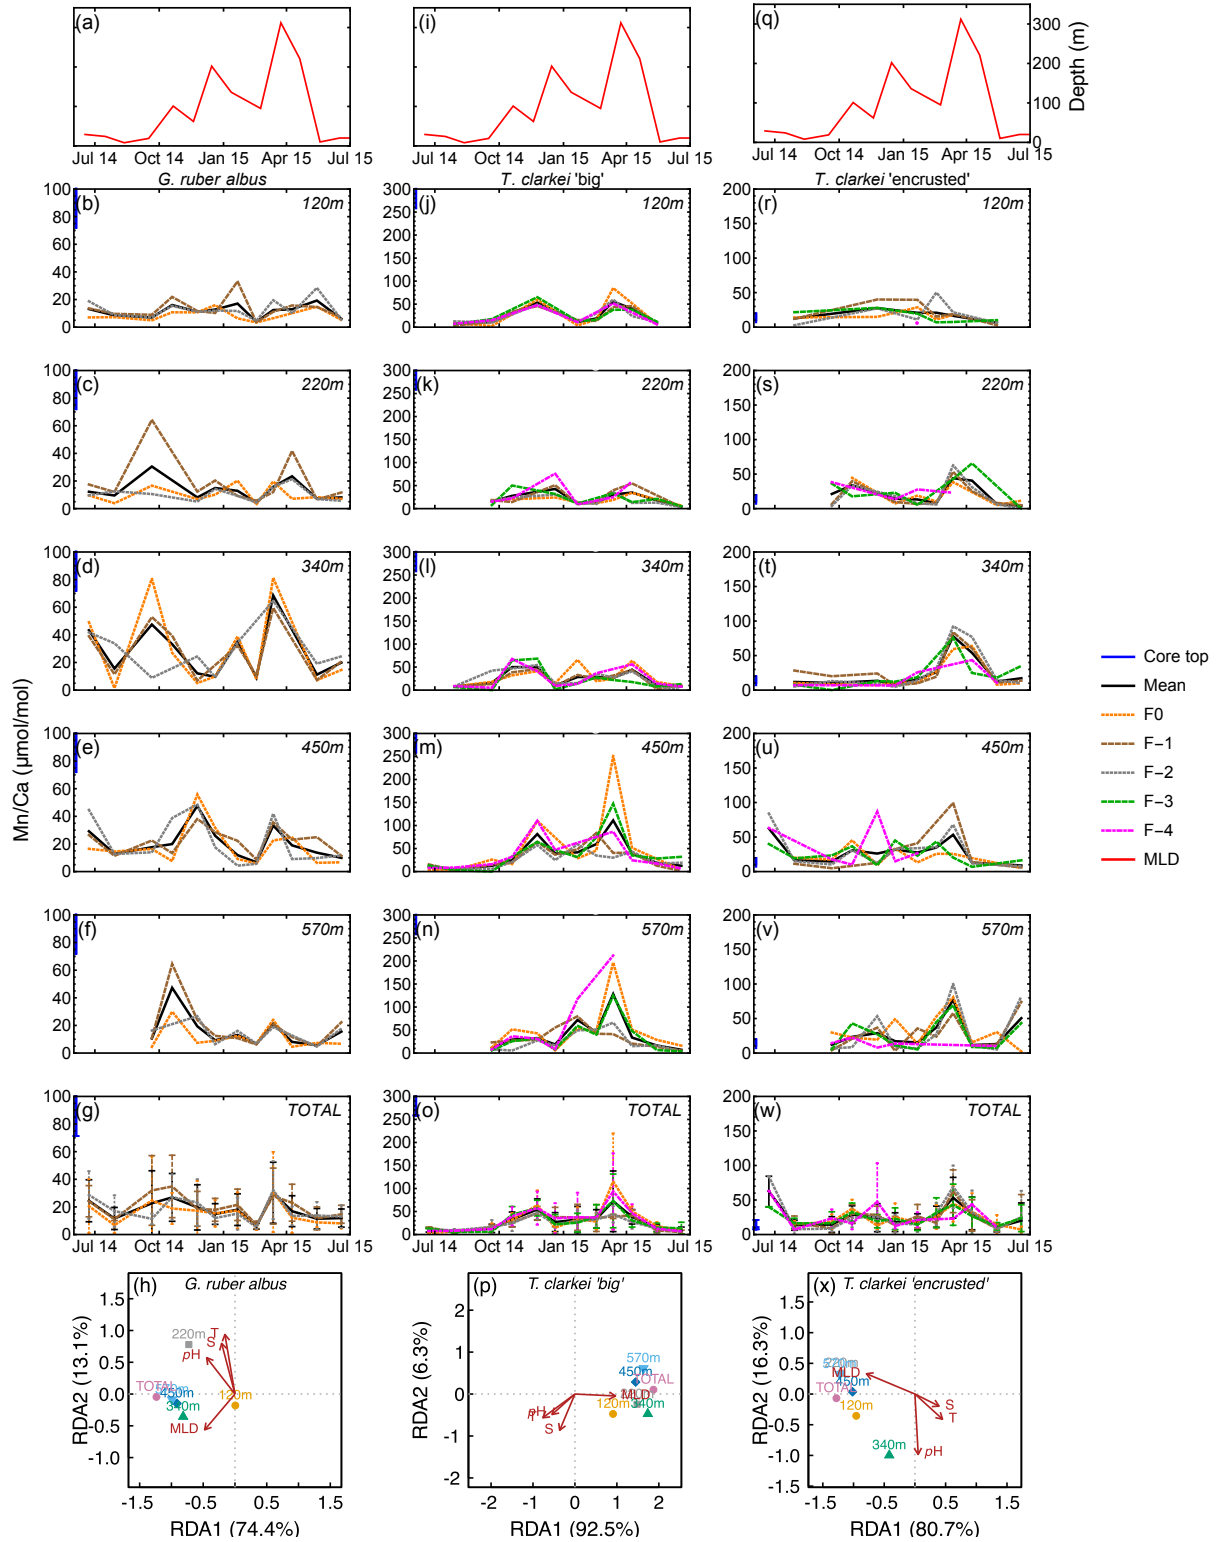

**Figure S7:** Time series of Mn/Ca values measured from the shells of *G. ruber albus* (b-f), *T. clarkei* 'big' (j-n) and *T. clarkei* 'encrusted' (r-v), derived from sediment traps located at different water depths (120-570 m). Mn/Ca of core top are marked by a blue bar along the left y-axes. Top panels a, i, and q show the depth (meters below surface layer) of the mixed layer depth (MLD). Panels g, o, and w represent the average values of all depths for each chamber for each species. Panels h, p and x show the redundancy analysis (RDA) per species for each water depth with MLD depth, temperature, salinity and pH as explanatory variables. No obvious trends in *G. ruber albus* between chambers and depths. *T. clarkei* types show more systematic trends between chambers and higher values compared to *G. ruber albus*. Both types of *T. clarkei* show water-column mixing excursions.



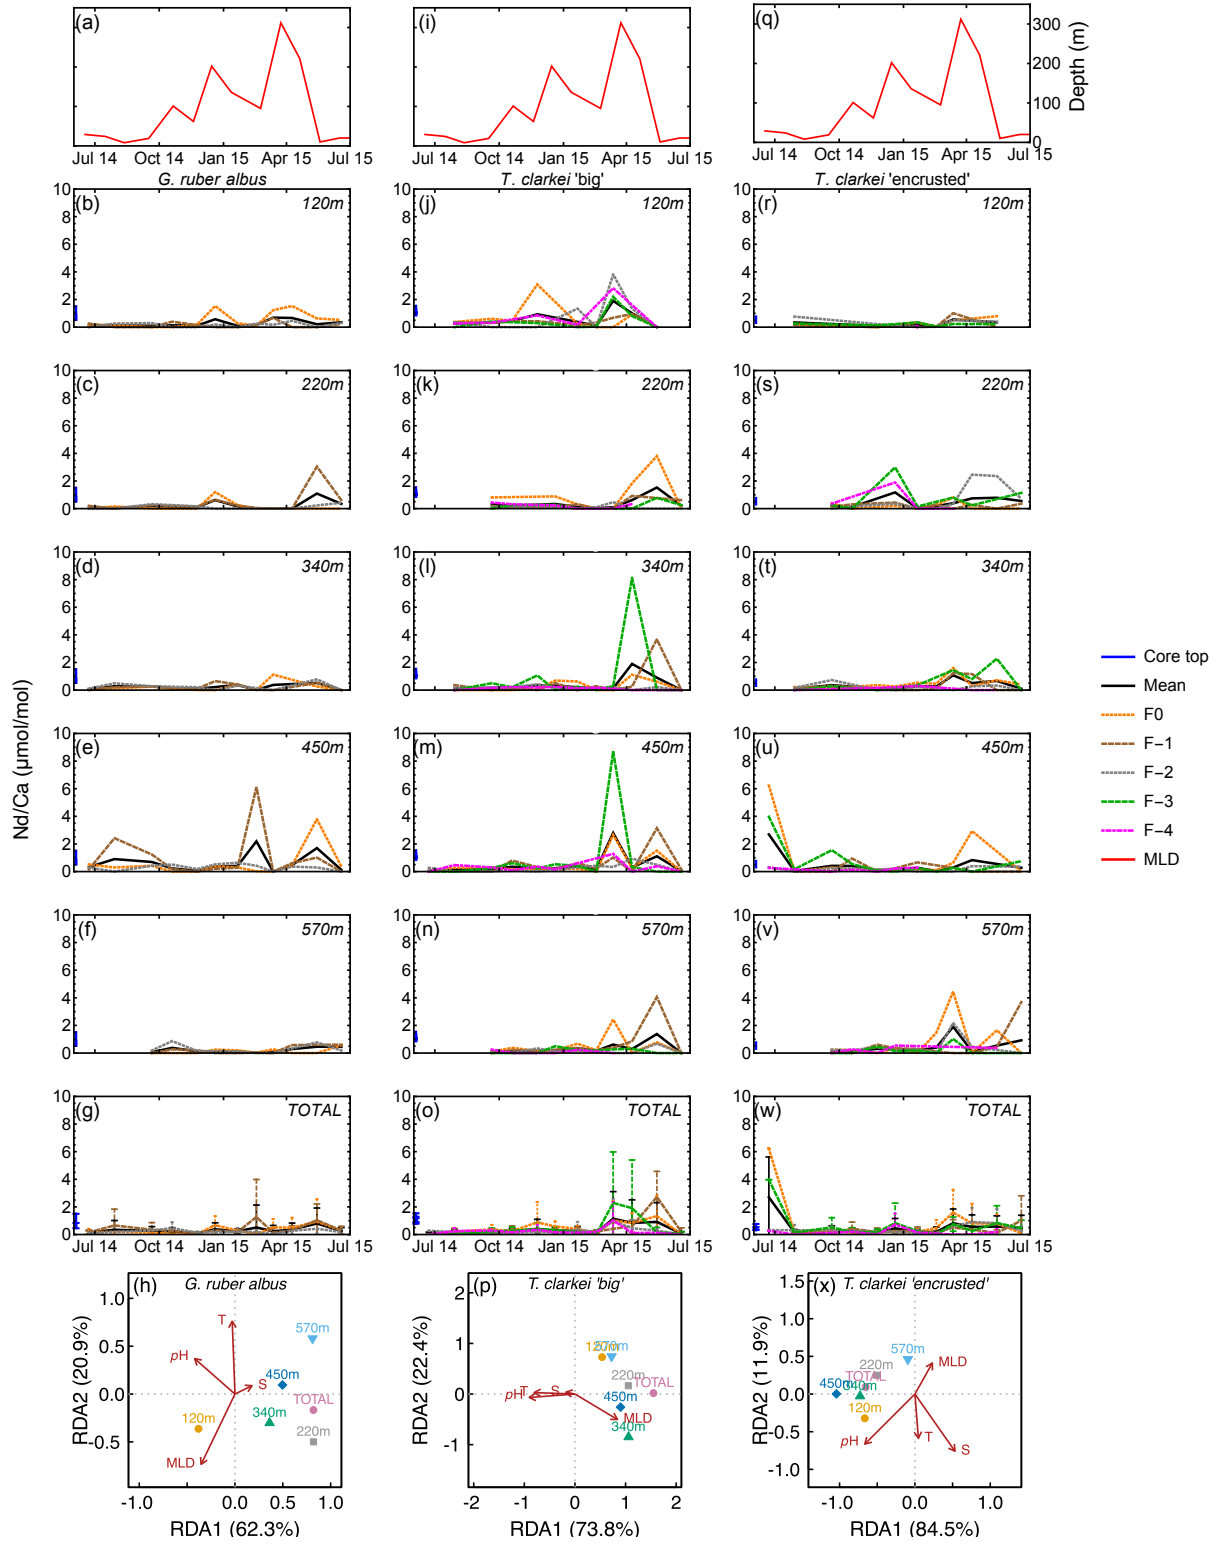

**Figure S8:** Time series of Nd/Ca values measured from the shells of *G. ruber albus* (b-f), *T. clarkei* 'big' (j-n) and *T. clarkei* 'encrusted' (r-v), derived from sediment traps located at different water depths (120-570 m). Nd/Ca of core top are marked by a blue bar along the left y-axes. Top panels a, i, and q show the depth (meters below surface layer) of the mixed layer depth (MLD). Panels g, o, and w represent the average values of all depths for each chamber for each species. Panels h, p and x show the redundancy analysis (RDA) per species for each water depth with MLD depth, temperature, salinity and pH as explanatory variables.

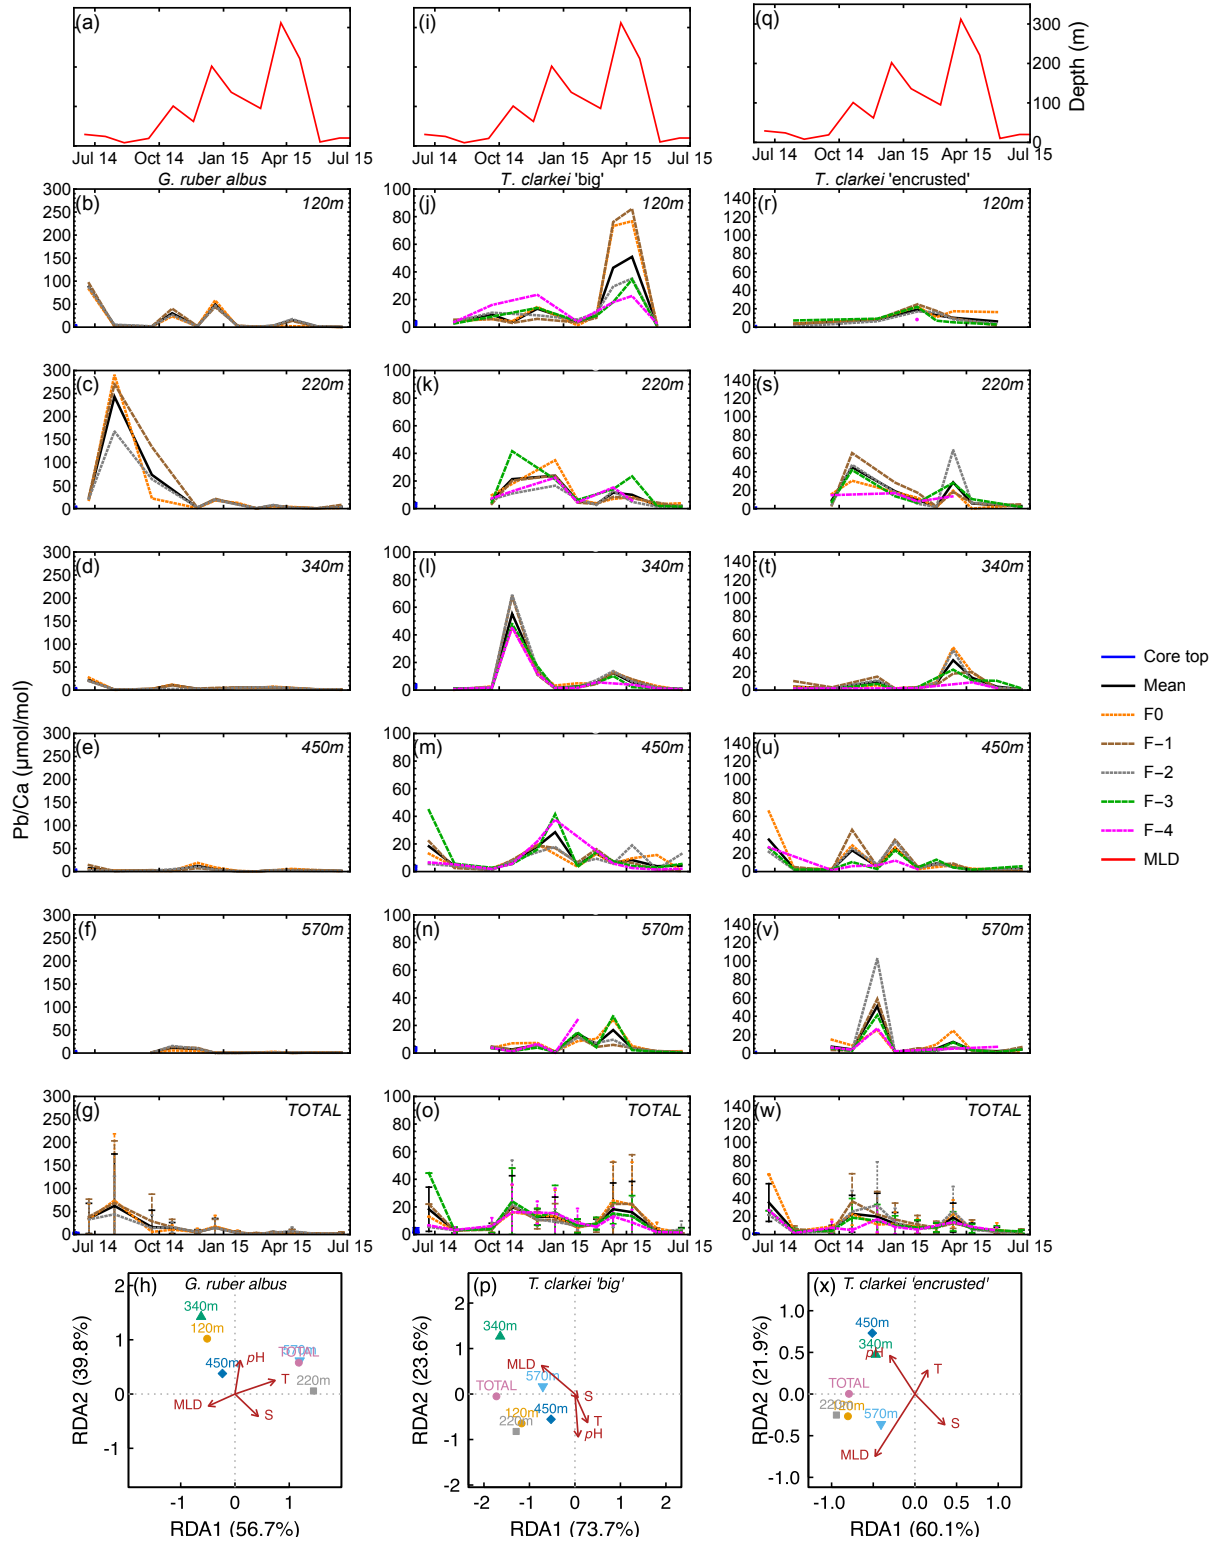

**Figure S9:** Time series of Pb/Ca values measured from the shells of *G. ruber albus* (b-f), *T. clarkei* 'big' (j-n) and *T. clarkei* 'encrusted' (r-v), derived from sediment traps located at different water depths (120-570 m). Pb/Ca of core top are marked by a blue bar along the left y-axes. Top panels a, i, and q show the depth (meters below surface layer) of the mixed layer depth (MLD). Panels g, o, and w represent the average values of all depths for each chamber for each species. Panels h, p and x show the redundancy analysis (RDA) per species for each water depth with MLD depth, temperature, salinity and pH as explanatory variables. Almost no ICV in *G. ruber albus* (except in 340 m during August). Similar trends in both *T. clarkei* phenotypes albite with peaks in different months and depths.

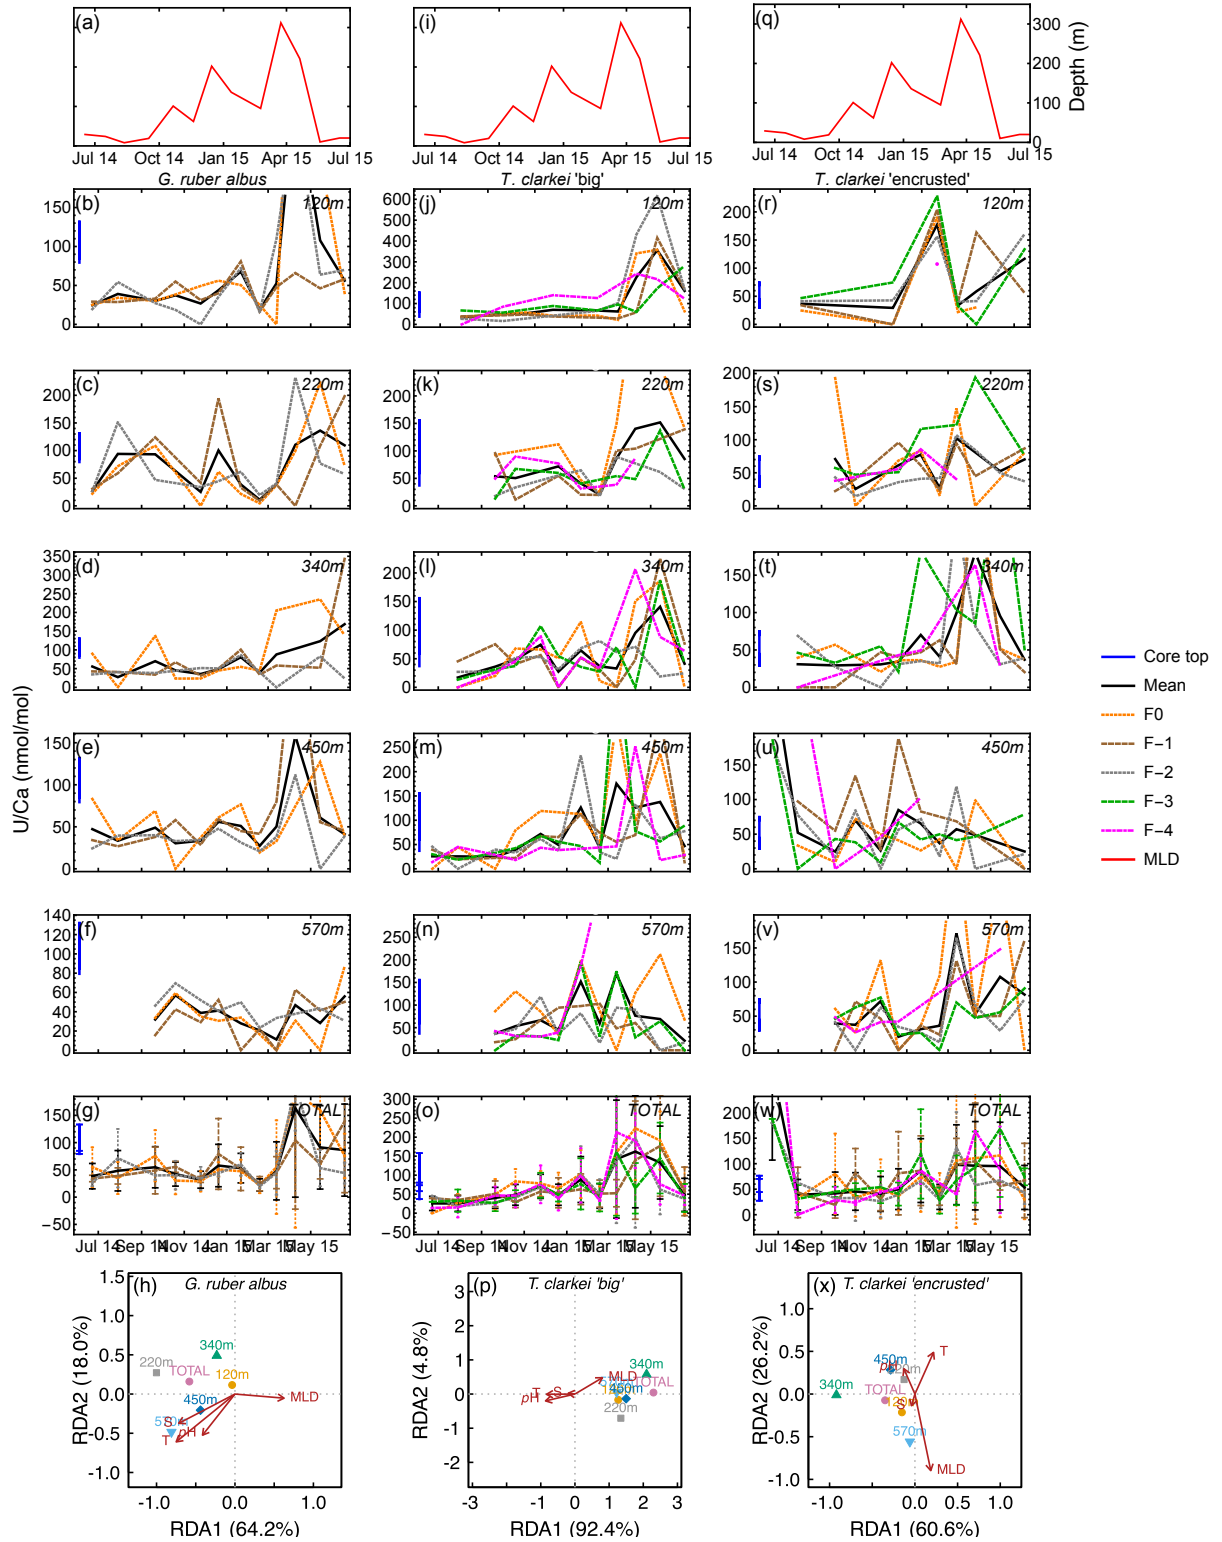

**Figure S10:** Time series of U/Ca values measured from the shells of *G. ruber albus* (b-f), *T. clarkei* 'big' (j-n) and *T. clarkei* 'encrusted' (r-v), derived from sediment traps located at different water depths (120-570 m). U/Ca of core top are marked by a blue bar along the left y-axes. Top panels a, i, and q show the depth (meters below surface layer) of the mixed layer depth (MLD). Panels g, o, and w represent the average values of all depths for each chamber for each species. Panels h, p and x show the redundancy analysis (RDA) per species for each water depth with MLD depth, temperature, salinity and pH as explanatory variables. *T. clarkei* 'big' exhibit higher values in the upper water column in the spring compared to *G. ruber albus* and *T. clarkei* 'encrusted' as well as to other water depths.

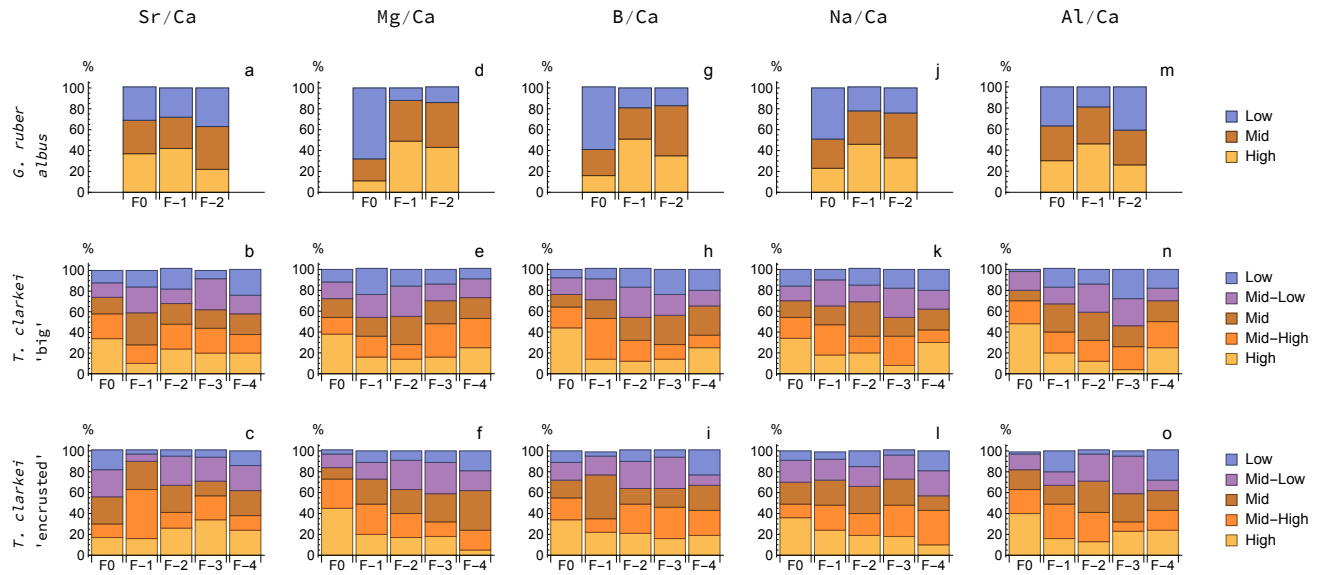

**Figure S11:** Frequency distribution of calcium-normalized element ratios in individual chambers of planktic foraminifera shells, categorized by the relative ranking of each chamber's value within the same shell: highest, second highest, middle, second lowest, and lowest. For example, Mg/Ca in ~65% of the *G. ruber albus* specimens (d) was lower in the F0 chamber than in the other two preceding chambers in the final whorl; similarly, about 50% of the specimens of *T. clarkei* 'big' display the highest Al/Ca values in F0 (n).

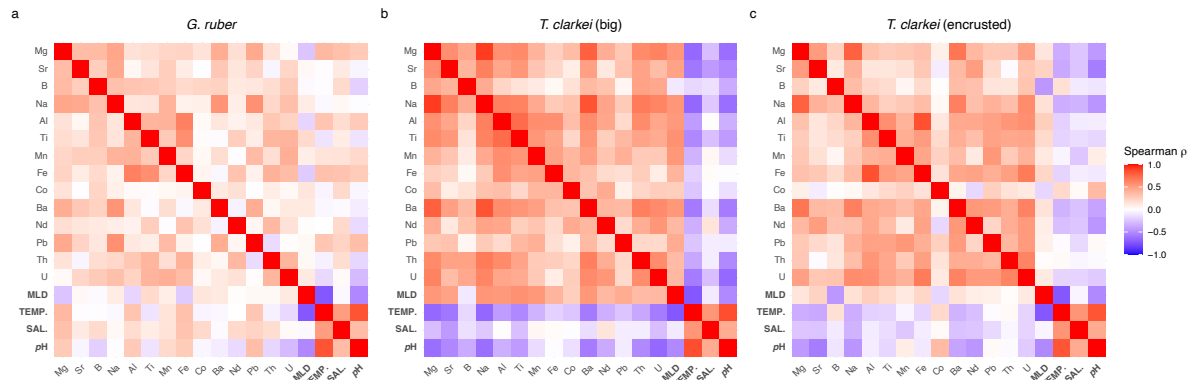

**Figure S12:** Spearman correlation matrix of the different trace element-Ca normalized abundances standard deviation in *G. ruber albus* (a), *T. clarkei* "big" (b) and, *T. clarkei* "encrusted" (c).
