# Supplementary material for: Monthly element ∕ Ca trends and inter chamber variability in two planktic Foraminifera species: Globigerinoides ruber albus and Turborotalita clarkei from a hypersaline oligotrophic sea
Source: Copernicus journal article supplement (doi:10.5194/bg-23-1065-2026), 2026-02-05
Supplement: Supplementary file 1 [file Levy et al., Supplementary tables_B.xlsx]

## Sheet: Table S1 - RSE 
	Element	Isotope	RSD (%)
	B	11	15.5
	Na	23	8.1
	Mg	25	9.3
	Al	27	7.8
	Ti	49	11.6
	Mn	55	7.1
	Fe	57	9.3
	Co	59	12.5
	Sr	88	5.2
	Ba	137	8
	Nd	146	7.6
	Pb	208	9.4
	Th	232	8.9
	U	238	17.4

## Sheet: Table S2 - Mean Spearman pvalue
	Variable	Mg	Sr	B	Na	Al	Ti	Mn	Fe	Co	Ba	Nd	Pb	Th	U	MLD	T	S	pH
G. ruber albus	Mg		0.196199	0.00425319	0.0198739	0.010307	0.47482	0.0136471	0.00253976	0.270169	0.0253047	0.645333	0.00121422	0.00447341	0.190589	0.0881778	7.24523e-05	0.000122791	0.000196726
	Sr	0.196199		0.000628351	0.000156082	0.475754	0.0311734	0.902502	0.340859	0.960124	0.0231742	0.183831	0.453606	0.148829	0.00599318	0.562522	0.368032	0.71909	0.00659245
	B	0.00425319	0.000628351		0.00378158	0.000780324	2.86924e-05	0.238174	0.00143786	0.95176	0.150372	0.288031	0.383739	0.0252423	6.64793e-05	0.0171852	0.439674	0.461221	0.367897
	Na	0.0198739	0.000156082	0.00378158		0.50423	0.0925852	0.0481024	0.300858	0.00670912	4.50383e-07	0.908826	0.00283516	0.502651	2.44784e-05	0.210176	0.168683	0.879363	0.189652
	Al	0.010307	0.475754	0.000780324	0.50423		4.2727e-07	0.000427978	4.21885e-15	0.896169	0.855177	0.0633091	0.811844	6.17551e-06	0.0053912	0.469408	0.233217	0.0704365	0.498426
	Ti	0.47482	0.0311734	2.86924e-05	0.0925852	4.2727e-07		0.0107383	7.56658e-06	0.7202	0.575284	0.0182514	0.566412	3.47554e-05	7.47297e-06	0.273618	0.125071	0.747653	0.0078827
	Mn	0.0136471	0.902502	0.238174	0.0481024	0.000427978	0.0107383		0.00661988	0.0943129	0.00611626	0.766731	3.54866e-05	0.0137223	0.00763574	0.155827	0.459839	0.462298	0.159927
	Fe	0.00253976	0.340859	0.00143786	0.300858	4.21885e-15	7.56658e-06	0.00661988		0.227391	0.954149	0.0563914	0.799062	3.40846e-05	0.0274847	0.283458	0.194025	0.0421444	0.220232
	Co	0.270169	0.960124	0.95176	0.00670912	0.896169	0.7202	0.0943129	0.227391		0.000158789	0.760049	0.0509167	0.361483	0.0228825	0.00454185	0.0899457	0.358257	0.369248
	Ba	0.0253047	0.0231742	0.150372	4.50383e-07	0.855177	0.575284	0.00611626	0.954149	0.000158789		0.739733	4.45708e-06	0.390406	3.35632e-06	0.0305111	0.49427	0.551015	0.276422
	Nd	0.645333	0.183831	0.288031	0.908826	0.0633091	0.0182514	0.766731	0.0563914	0.760049	0.739733		0.542777	0.00761629	0.0123096	0.855941	0.768926	0.161972	0.266937
	Pb	0.00121422	0.453606	0.383739	0.00283516	0.811844	0.566412	3.54866e-05	0.799062	0.0509167	4.45708e-06	0.542777		0.534289	0.121847	0.567975	0.104714	0.294584	0.0215359
	Th	0.00447341	0.148829	0.0252423	0.502651	6.17551e-06	3.47554e-05	0.0137223	3.40846e-05	0.361483	0.390406	0.00761629	0.534289		0.00444984	0.724073	0.550019	0.0232635	0.71842
	U	0.190589	0.00599318	6.64793e-05	2.44784e-05	0.0053912	7.47297e-06	0.00763574	0.0274847	0.0228825	3.35632e-06	0.0123096	0.121847	0.00444984		0.292827	0.239597	0.171974	0.0132884
	MLD	0.0881778	0.562522	0.0171852	0.210176	0.469408	0.273618	0.155827	0.283458	0.00454185	0.0305111	0.855941	0.567975	0.724073	0.292827		3.2902e-10	0.827018	4.61058e-05
	T	7.24523e-05	0.368032	0.439674	0.168683	0.233217	0.125071	0.459839	0.194025	0.0899457	0.49427	0.768926	0.104714	0.550019	0.239597	3.2902e-10		8.00203e-05	3.77476e-15
	S	0.000122791	0.71909	0.461221	0.879363	0.0704365	0.747653	0.462298	0.0421444	0.358257	0.551015	0.161972	0.294584	0.0232635	0.171974	0.827018	8.00203e-05		0.00906425
	pH	0.000196726	0.00659245	0.367897	0.189652	0.498426	0.0078827	0.159927	0.220232	0.369248	0.276422	0.266937	0.0215359	0.71842	0.0132884	4.61058e-05	3.77476e-15	0.00906425
T. clarkei 'big'	Mg		0.00120251	0.00063071	1.82965e-13	1.1861e-05	0.000172461	0.000352077	0.0470322	0.176387	1.12842e-09	0.000592434	0.0116838	0.000261345	2.36979e-05	0.00930681	0.000242295	0.0580619	0.0010777
	Sr	0.00120251		0.02207	0.000253556	0.0115459	0.00154646	0.142373	0.570343	0.530165	0.000159407	0.0593869	0.809197	0.00120565	0.000232144	0.0336165	0.000119387	0.147224	6.92207e-10
	B	0.00063071	0.02207		0.372904	0.988434	0.802848	0.178889	0.138513	0.358026	0.774679	0.288265	0.718758	0.194216	0.848522	0.0107811	0.336726	0.65841	0.455895
	Na	1.82965e-13	0.000253556	0.372904		4.83428e-10	2.40611e-08	5.13996e-07	0.00562423	0.0207542	0	8.76302e-05	0.027006	2.47351e-06	1.33334e-08	3.42807e-06	3.29701e-09	0.0175562	2.15785e-06
	Al	1.1861e-05	0.0115459	0.988434	4.83428e-10		2.73115e-13	2.60327e-09	1.01583e-08	0.0474054	2.26348e-11	4.70834e-06	0.00562423	9.71569e-11	1.50534e-07	1.4184e-07	1.03159e-05	0.522923	0.000984707
	Ti	0.000172461	0.00154646	0.802848	2.40611e-08	2.73115e-13		7.50226e-08	3.7069e-05	0.160545	4.35279e-08	0.00376715	0.00357662	3.62132e-07	3.22288e-06	3.76872e-07	1.60133e-06	0.0969884	0.000115937
	Mn	0.000352077	0.142373	0.178889	5.13996e-07	2.60327e-09	7.50226e-08		7.60249e-06	0.00634837	1.943e-09	0.000965442	6.98178e-08	0.00801034	3.60232e-05	1.93059e-07	0.000836865	0.414564	0.179661
	Fe	0.0470322	0.570343	0.138513	0.00562423	1.01583e-08	3.7069e-05	7.60249e-06		0.0166582	0.000243745	0.00431703	0.0206789	0.000114957	0.0124436	9.70836e-05	0.017804	0.853885	0.244365
	Co	0.176387	0.530165	0.358026	0.0207542	0.0474054	0.160545	0.00634837	0.0166582		0.00786145	0.00254749	0.0322291	0.145591	0.0345871	0.0061468	0.120831	0.993184	0.97249
	Ba	1.12842e-09	0.000159407	0.774679	0	2.26348e-11	4.35279e-08	1.943e-09	0.000243745	0.00786145		1.96988e-05	0.00137538	2.1869e-06	1.13643e-09	2.18707e-07	5.63479e-08	0.0696571	5.98846e-06
	Nd	0.000592434	0.0593869	0.288265	8.76302e-05	4.70834e-06	0.00376715	0.000965442	0.00431703	0.00254749	1.96988e-05		0.104767	1.55269e-06	5.04956e-07	0.00276668	0.0674553	0.161639	0.0928402
	Pb	0.0116838	0.809197	0.718758	0.027006	0.00562423	0.00357662	6.98178e-08	0.0206789	0.0322291	0.00137538	0.104767		0.162491	0.0289434	0.00202283	0.11733	0.55466	0.995961
	Th	0.000261345	0.00120565	0.194216	2.47351e-06	9.71569e-11	3.62132e-07	0.00801034	0.000114957	0.145591	2.1869e-06	1.55269e-06	0.162491		9.51409e-10	0.00174874	0.00150631	0.919104	0.000150782
	U	2.36979e-05	0.000232144	0.848522	1.33334e-08	1.50534e-07	3.22288e-06	3.60232e-05	0.0124436	0.0345871	1.13643e-09	5.04956e-07	0.0289434	9.51409e-10		0.000113689	3.01952e-05	0.319262	6.45784e-05
	MLD	0.00930681	0.0336165	0.0107811	3.42807e-06	1.4184e-07	3.76872e-07	1.93059e-07	9.70836e-05	0.0061468	2.18707e-07	0.00276668	0.00202283	0.00174874	0.000113689		1.50179e-09	0.528982	0.000113197
	T	0.000242295	0.000119387	0.336726	3.29701e-09	1.03159e-05	1.60133e-06	0.000836865	0.017804	0.120831	5.63479e-08	0.0674553	0.11733	0.00150631	3.01952e-05	1.50179e-09		4.57108e-05	5.32907e-15
	S	0.0580619	0.147224	0.65841	0.0175562	0.522923	0.0969884	0.414564	0.853885	0.993184	0.0696571	0.161639	0.55466	0.919104	0.319262	0.528982	4.57108e-05		0.00170922
	pH	0.0010777	6.92207e-10	0.455895	2.15785e-06	0.000984707	0.000115937	0.179661	0.244365	0.97249	5.98846e-06	0.0928402	0.995961	0.000150782	6.45784e-05	0.000113197	5.32907e-15	0.00170922
T. clarkei 'encrusted'	Mg		0.00454495	0.000265369	5.52234e-11	0.00116415	0.0185248	0.0209748	0.00400835	0.290393	4.37609e-07	0.00113061	0.00667164	0.0026684	1.51056e-07	0.396435	0.181893	0.314814	0.021206
	Sr	0.00454495		0.00632772	0.0599356	0.503038	0.0511503	0.898709	0.11315	0.0298269	0.0189944	5.37132e-05	0.767543	0.545259	0.00169892	0.188374	0.0293893	0.608707	7.08102e-06
	B	0.000265369	0.00632772		0.00438383	0.149228	0.15195	0.889556	0.144112	0.0913509	0.0378362	0.00737002	0.478574	0.39398	0.00189895	0.0105758	0.70928	0.341874	0.142033
	Na	5.52234e-11	0.0599356	0.00438383		0.00484273	0.0414169	0.000396814	0.00701329	0.0864851	5.25802e-10	0.0146877	0.00322746	0.0222945	4.56954e-08	0.131127	0.00179185	0.00295676	0.000387351
	Al	0.00116415	0.503038	0.149228	0.00484273		1.29502e-05	0.000408459	6.66134e-16	0.0395536	0.00902706	0.0094943	0.000333021	9.60968e-05	3.82622e-05	0.0117024	0.0647144	0.643414	0.628994
	Ti	0.0185248	0.0511503	0.15195	0.0414169	1.29502e-05		0.0127586	2.22128e-05	0.278714	0.00591957	0.0274535	0.0654746	5.25267e-05	0.000756329	0.0940939	0.192423	0.534639	0.113869
	Mn	0.0209748	0.898709	0.889556	0.000396814	0.000408459	0.0127586		0.000115373	0.00223822	5.7071e-05	0.24845	5.03168e-05	0.0105413	0.0290175	0.0128681	0.095055	0.0612259	0.640075
	Fe	0.00400835	0.11315	0.144112	0.00701329	6.66134e-16	2.22128e-05	0.000115373		0.0259604	0.0111321	0.00966269	0.00294957	0.00186073	5.81801e-06	0.0312145	0.0873494	0.632587	0.560844
	Co	0.290393	0.0298269	0.0913509	0.0864851	0.0395536	0.278714	0.00223822	0.0259604		0.101549	0.73996	0.353491	0.000754743	0.245551	0.617719	0.795507	0.723485	0.0641812
	Ba	4.37609e-07	0.0189944	0.0378362	5.25802e-10	0.00902706	0.00591957	5.7071e-05	0.0111321	0.101549		0.00305454	0.00301041	0.00700233	5.27875e-05	0.00424953	0.000246393	0.0526545	0.000201787
	Nd	0.00113061	5.37132e-05	0.00737002	0.0146877	0.0094943	0.0274535	0.24845	0.00966269	0.73996	0.00305454		0.616673	0.00337869	0.00105224	0.245238	0.0738666	0.404118	0.00536018
	Pb	0.00667164	0.767543	0.478574	0.00322746	0.000333021	0.0654746	5.03168e-05	0.00294957	0.353491	0.00301041	0.616673		0.138049	0.000678088	0.115915	0.468133	0.16341	0.643414
	Th	0.0026684	0.545259	0.39398	0.0222945	9.60968e-05	5.25267e-05	0.0105413	0.00186073	0.000754743	0.00700233	0.00337869	0.138049		0.00598971	0.535269	0.930717	0.679877	0.892633
	U	1.51056e-07	0.00169892	0.00189895	4.56954e-08	3.82622e-05	0.000756329	0.0290175	5.81801e-06	0.245551	5.27875e-05	0.00105224	0.000678088	0.00598971		0.124675	0.0112928	0.0681735	0.00739232
	MLD	0.396435	0.188374	0.0105758	0.131127	0.0117024	0.0940939	0.0128681	0.0312145	0.617719	0.00424953	0.245238	0.115915	0.535269	0.124675		7.72871e-09	0.758603	0.000263296
	T	0.181893	0.0293893	0.70928	0.00179185	0.0647144	0.192423	0.095055	0.0873494	0.795507	0.000246393	0.0738666	0.468133	0.930717	0.0112928	7.72871e-09		7.70738e-05	1.20171e-12
	S	0.314814	0.608707	0.341874	0.00295676	0.643414	0.534639	0.0612259	0.632587	0.723485	0.0526545	0.404118	0.16341	0.679877	0.0681735	0.758603	7.70738e-05		0.00232103
	pH	0.021206	7.08102e-06	0.142033	0.000387351	0.628994	0.113869	0.640075	0.560844	0.0641812	0.000201787	0.00536018	0.643414	0.892633	0.00739232	0.000263296	1.20171e-12	0.00232103

## Sheet: Table S3 - SD Spearman pvalue
	Variable	Mg	Sr	B	Na	Al	Ti	Mn	Fe	Co	Ba	Nd	Pb	Th	U	MLD	T	S	pH
G. ruber albus	Mg		0.00927885	0.00704147	0.000391924	0.255423	0.189032	0.11442	0.0937003	0.284784	0.00104795	0.213749	0.000649081	0.275816	0.81262	0.0587716	0.00498348	0.0140601	0.0376961
	Sr	0.00927885		0.0570159	0.000667545	0.758755	0.301808	0.0568103	0.459701	0.950167	0.0331893	0.328342	0.0990075	0.751941	0.109282	0.797805	0.937019	0.429115	0.754323
	B	0.00704147	0.0570159		0.0157218	0.0236341	0.0283225	0.0545221	0.151397	0.102019	0.0801773	0.403402	0.344723	0.194046	0.041672	0.853701	0.928243	0.165674	0.137988
	Na	0.000391924	0.000667545	0.0157218		0.321946	0.303474	0.00247382	0.619159	0.558954	1.28294e-05	0.524764	5.83085e-06	0.12992	0.0128974	0.463839	0.823105	0.781564	0.924655
	Al	0.255423	0.758755	0.0236341	0.321946		0.00341828	0.00236431	1.35534e-07	0.824285	0.349135	0.628506	0.367129	0.0305281	0.0929895	0.192267	0.0228273	0.19332	0.0373782
	Ti	0.189032	0.301808	0.0283225	0.303474	0.00341828		0.0382843	3.83899e-06	0.891028	0.90686	0.0545456	0.502626	0.00415324	0.0033874	0.154179	0.376186	0.456469	0.380028
	Mn	0.11442	0.0568103	0.0545221	0.00247382	0.00236431	0.0382843		0.111362	0.789414	0.197087	0.934041	0.00752342	0.210539	0.00145516	0.503565	0.292944	0.267515	0.141595
	Fe	0.0937003	0.459701	0.151397	0.619159	1.35534e-07	3.83899e-06	0.111362		0.682324	0.806415	0.019866	0.609639	0.00232268	0.0100173	0.101577	0.0151867	0.0191797	0.0466635
	Co	0.284784	0.950167	0.102019	0.558954	0.824285	0.891028	0.789414	0.682324		0.418562	0.231065	0.949769	0.483574	0.802156	0.335096	0.728319	0.142086	0.792188
	Ba	0.00104795	0.0331893	0.0801773	1.28294e-05	0.349135	0.90686	0.197087	0.806415	0.418562		0.676581	0.00120195	0.768741	0.418852	0.410446	0.796254	0.879363	0.580335
	Nd	0.213749	0.328342	0.403402	0.524764	0.628506	0.0545456	0.934041	0.019866	0.231065	0.676581		0.742192	0.00515121	0.26221	0.941898	0.998098	0.136994	0.249622
	Pb	0.000649081	0.0990075	0.344723	5.83085e-06	0.367129	0.502626	0.00752342	0.609639	0.949769	0.00120195	0.742192		0.270135	0.916774	0.811599	0.0263444	0.0978233	0.0104876
	Th	0.275816	0.751941	0.194046	0.12992	0.0305281	0.00415324	0.210539	0.00232268	0.483574	0.768741	0.00515121	0.270135		0.00391953	0.805976	0.65238	0.200559	0.204107
	U	0.81262	0.109282	0.041672	0.0128974	0.0929895	0.0033874	0.00145516	0.0100173	0.802156	0.418852	0.26221	0.916774	0.00391953		0.414634	0.238372	0.827601	0.0273056
	MLD	0.0587716	0.797805	0.853701	0.463839	0.192267	0.154179	0.503565	0.101577	0.335096	0.410446	0.941898	0.811599	0.805976	0.414634		3.2902e-10	0.827018	4.61058e-05
	T	0.00498348	0.937019	0.928243	0.823105	0.0228273	0.376186	0.292944	0.0151867	0.728319	0.796254	0.998098	0.0263444	0.65238	0.238372	3.2902e-10		8.00203e-05	3.77476e-15
	S	0.0140601	0.429115	0.165674	0.781564	0.19332	0.456469	0.267515	0.0191797	0.142086	0.879363	0.136994	0.0978233	0.200559	0.827601	0.827018	8.00203e-05		0.00906425
	pH	0.0376961	0.754323	0.137988	0.924655	0.0373782	0.380028	0.141595	0.0466635	0.792188	0.580335	0.249622	0.0104876	0.204107	0.0273056	4.61058e-05	3.77476e-15	0.00906425
T. clarkei 'big'	Mg		1.17687e-05	0.000770966	0	1.70362e-05	4.56455e-06	0.0039288	0.0810692	0.0129397	1.60369e-11	0.00223611	0.0400575	4.81966e-06	5.69216e-07	6.16526e-05	1.97642e-07	0.0481118	8.87979e-07
	Sr	1.17687e-05		0.00479995	3.46206e-07	0.000710246	5.43921e-05	0.0316341	0.143797	0.507966	0.000268541	0.39303	0.026308	0.000358335	0.0132197	0.000415446	5.3436e-06	0.00134206	0.000101514
	B	0.000770966	0.00479995		0.00135089	0.121473	0.301009	0.461929	0.819479	0.268394	0.0093682	0.0243336	0.749188	0.00037772	0.000892132	0.503227	0.244496	0.363	0.00940257
	Na	0	3.46206e-07	0.00135089		4.01993e-07	5.80343e-07	0.00129636	0.0526431	0.0222693	6.75016e-14	0.000511739	0.0515918	9.80941e-08	1.22832e-06	4.46549e-05	1.6758e-07	0.0957977	7.86917e-07
	Al	1.70362e-05	0.000710246	0.121473	4.01993e-07		1.0969e-09	7.3308e-06	1.2237e-05	0.0152126	5.88064e-06	0.00068443	0.170041	4.77957e-06	0.000708299	7.72075e-05	0.00171827	0.92966	0.0130522
	Ti	4.56455e-06	5.43921e-05	0.301009	5.80343e-07	1.0969e-09		4.79856e-05	0.000560865	0.14523	4.21295e-05	0.0746868	0.00761864	0.000469125	0.00145868	1.81718e-05	9.03917e-05	0.0535169	0.00152951
	Mn	0.0039288	0.0316341	0.461929	0.00129636	7.3308e-06	4.79856e-05		0.000328022	0.00654163	0.000258204	0.0304037	0.0027523	0.0502427	0.0444864	5.77404e-05	0.0199142	0.763885	0.294757
	Fe	0.0810692	0.143797	0.819479	0.0526431	1.2237e-05	0.000560865	0.000328022		0.00602863	0.0205664	0.185	0.240794	0.0631894	0.503098	0.00538081	0.172692	0.87504	0.932678
	Co	0.0129397	0.507966	0.268394	0.0222693	0.0152126	0.14523	0.00654163	0.00602863		0.0283994	0.00142035	0.578111	0.128875	0.0646189	0.075533	0.0861294	0.922621	0.349298
	Ba	1.60369e-11	0.000268541	0.0093682	6.75016e-14	5.88064e-06	4.21295e-05	0.000258204	0.0205664	0.0283994		0.00682117	0.0096978	2.59586e-07	4.96245e-06	4.98001e-05	1.10111e-05	0.30632	1.30317e-05
	Nd	0.00223611	0.39303	0.0243336	0.000511739	0.00068443	0.0746868	0.0304037	0.185	0.00142035	0.00682117		0.187806	0.00188297	4.87404e-05	0.00807965	0.0138278	0.324395	0.00826709
	Pb	0.0400575	0.026308	0.749188	0.0515918	0.170041	0.00761864	0.0027523	0.240794	0.578111	0.0096978	0.187806		0.148679	0.157468	0.00157688	0.0763012	0.604462	0.54553
	Th	4.81966e-06	0.000358335	0.00037772	9.80941e-08	4.77957e-06	0.000469125	0.0502427	0.0631894	0.128875	2.59586e-07	0.00188297	0.148679		5.73709e-06	0.0112327	0.00658543	0.565581	0.00013221
	U	5.69216e-07	0.0132197	0.000892132	1.22832e-06	0.000708299	0.00145868	0.0444864	0.503098	0.0646189	4.96245e-06	4.87404e-05	0.157468	5.73709e-06		0.00815359	1.19821e-05	0.047657	2.45616e-07
	MLD	6.16526e-05	0.000415446	0.503227	4.46549e-05	7.72075e-05	1.81718e-05	5.77404e-05	0.00538081	0.075533	4.98001e-05	0.00807965	0.00157688	0.0112327	0.00815359		1.50179e-09	0.528982	0.000113197
	T	1.97642e-07	5.3436e-06	0.244496	1.6758e-07	0.00171827	9.03917e-05	0.0199142	0.172692	0.0861294	1.10111e-05	0.0138278	0.0763012	0.00658543	1.19821e-05	1.50179e-09		4.57108e-05	5.32907e-15
	S	0.0481118	0.00134206	0.363	0.0957977	0.92966	0.0535169	0.763885	0.87504	0.922621	0.30632	0.324395	0.604462	0.565581	0.047657	0.528982	4.57108e-05		0.00170922
	pH	8.87979e-07	0.000101514	0.00940257	7.86917e-07	0.0130522	0.00152951	0.294757	0.932678	0.349298	1.30317e-05	0.00826709	0.54553	0.00013221	2.45616e-07	0.000113197	5.32907e-15	0.00170922
T. clarkei 'encrusted'	Mg		0.000244204	0.103245	1.81288e-10	0.0285894	0.070649	0.0483712	0.0276303	0.5674	8.73497e-08	0.0107545	0.0540573	0.0509266	0.00046809	0.362205	0.015354	0.0966737	0.00209958
	Sr	0.000244204		0.456164	0.0052424	0.355525	0.376676	0.26905	0.0483712	0.604726	0.0137433	0.000308149	0.183288	0.919494	0.047074	0.117231	0.00996054	0.0857793	3.78429e-05
	B	0.103245	0.456164		0.016938	0.148778	0.219893	0.752247	0.205367	0.947106	0.018737	0.0276895	0.350251	0.373253	0.037076	0.00151282	0.270701	0.559795	0.467893
	Na	1.81288e-10	0.0052424	0.016938		0.00882335	0.0938622	0.0567754	0.01617	0.808549	1.22093e-06	0.0231771	0.0051715	0.020084	1.42033e-05	0.292579	0.014837	0.0254175	0.00121681
	Al	0.0285894	0.355525	0.148778	0.00882335		2.79977e-05	0.00571653	1.31672e-13	0.408223	0.00171485	0.00156142	0.000548774	9.10988e-05	2.78696e-05	0.0860022	0.18294	0.56505	0.610614
	Ti	0.070649	0.376676	0.219893	0.0938622	2.79977e-05		0.0031445	0.000212848	0.191798	0.00389695	0.0217367	0.0006597	0.00145933	0.000988496	0.204513	0.222351	0.330609	0.242512
	Mn	0.0483712	0.26905	0.752247	0.0567754	0.00571653	0.0031445		0.00100162	0.106528	0.0156502	0.463254	0.000110771	0.0580362	0.00548982	0.439395	0.750107	0.10843	0.520878
	Fe	0.0276303	0.0483712	0.205367	0.01617	1.31672e-13	0.000212848	0.00100162		0.306825	0.00117552	0.000699323	0.00380979	0.000444481	3.98287e-07	0.160646	0.216092	0.60898	0.509046
	Co	0.5674	0.604726	0.947106	0.808549	0.408223	0.191798	0.106528	0.306825		0.669364	0.255964	0.0935454	0.30714	0.43755	0.23571	0.187038	0.859202	0.0140978
	Ba	8.73497e-08	0.0137433	0.018737	1.22093e-06	0.00171485	0.00389695	0.0156502	0.00117552	0.669364		0.000105903	0.000256518	0.00323286	2.01938e-06	0.330413	0.0258354	0.0726859	0.00603719
	Nd	0.0107545	0.000308149	0.0276895	0.0231771	0.00156142	0.0217367	0.463254	0.000699323	0.255964	0.000105903		0.142146	0.0030775	0.000184469	0.556392	0.0613397	0.0961858	0.0014633
	Pb	0.0540573	0.183288	0.350251	0.0051715	0.000548774	0.0006597	0.000110771	0.00380979	0.0935454	0.000256518	0.142146		0.0100479	0.000177412	0.587903	0.907815	0.274154	0.840678
	Th	0.0509266	0.919494	0.373253	0.020084	9.10988e-05	0.00145933	0.0580362	0.000444481	0.30714	0.00323286	0.0030775	0.0100479		2.71629e-06	0.917943	0.859794	0.801773	0.898906
	U	0.00046809	0.047074	0.037076	1.42033e-05	2.78696e-05	0.000988496	0.00548982	3.98287e-07	0.43755	2.01938e-06	0.000184469	0.000177412	2.71629e-06		0.452698	0.221449	0.21228	0.129899
	MLD	0.362205	0.117231	0.00151282	0.292579	0.0860022	0.204513	0.439395	0.160646	0.23571	0.330413	0.556392	0.587903	0.917943	0.452698		7.72871e-09	0.758603	0.000263296
	T	0.015354	0.00996054	0.270701	0.014837	0.18294	0.222351	0.750107	0.216092	0.187038	0.0258354	0.0613397	0.907815	0.859794	0.221449	7.72871e-09		7.70738e-05	1.20171e-12
	S	0.0966737	0.0857793	0.559795	0.0254175	0.56505	0.330609	0.10843	0.60898	0.859202	0.0726859	0.0961858	0.274154	0.801773	0.21228	0.758603	7.70738e-05		0.00232103
	pH	0.00209958	3.78429e-05	0.467893	0.00121681	0.610614	0.242512	0.520878	0.509046	0.0140978	0.00603719	0.0014633	0.840678	0.898906	0.129899	0.000263296	1.20171e-12	0.00232103

## Sheet: Table S4 - LA_ICP_MS_ data
#	Sampling date	Sampling depth	Species	Chamber number	Mg/Ca (shell)	Mg/Ca (mean)	SD	Sr/Ca (shell)	Sr/Ca (mean)	SD	B/Ca (shell)	B/Ca (mean)	SD	Na/Ca (shell)	Na/Ca (mean)	SD	Al/Ca (shell)	Al/Ca (mean)	SD	Ti/Ca (shell)	Ti/Ca (mean)	SD	Mn/Ca (shell)	Mn/Ca (mean)	SD	Fe/Ca (shell)	Fe/Ca (mean)	SD	Co/Ca (shell)	Co/Ca (mean)	SD	Ba/Ca (shell)	Ba/Ca (mean)	SD	Nd/Ca (shell)	Nd/Ca (mean)	SD	Pb/Ca (shell)	Pb/Ca (mean)	SD	Th/Ca (shell)	Th/Ca (mean)	SD	U/Ca (shell)	U/Ca (mean)	SD
		(mbsl)			(mmol/mol)			(mmol/mol)			(mmol/mol)			(mmol/mol)			(mmol/mol)			(µmol/mol)			(µmol/mol)			(mmol/mol)			(µmol/mol)			(µmol/mol)			(µmol/mol)			(µmol/mol)			(µmol/mol)			(nmol/mol)
1	2015-01-21	340	G. ruber	F0	6.08			1.54			0.135			9.24			0.34			5			38.87			0.22			1.78			5.45			0.41			4.71			0			54.77
2	2015-01-21	340	G. ruber	F-1	6.36			1.46			0.151			7.84			0.57			9.08			32.2			0.23			8.24			13.44			0.41			5.99			0			100.73
3	2015-01-21	340	G. ruber	F-2	7.81	6.75	0.93	1.49	1.5	0.04	0.146	0.144	0.008	8.65	8.58	0.7	1	0.64	0.34	37.25	17.11	17.56	34.39	35.15	3.4	0.41	0.29	0.11	3.76	4.59	3.31	6.61	8.5	4.32	0.31	0.38	0.06	5.28	5.33	0.65	0.113	0.038	0.066	86.15	80.55	23.48
4	2015-01-21	120	T. clarkei (big)	F0	4.05			1.46			0.107			9.96			0.12			6.51			3.79			0.09			9.78			3.2			0.24			1.22			0			42.32
5	2015-01-21	120	T. clarkei (big)	F-1	6.99			1.37			0.044			14.85			0.63			27.78			15.57			0.72			1.81			4.37			0.14			3.41			0.022			32.26
6	2015-01-21	120	T. clarkei (big)	F-2	6.84			1.24			0.031			14.64			0.34			11.11			11.71			0.05			5.82			4.13			1.34			5.52			0			64.58
7	2015-01-21	120	T. clarkei (big)	F-3	6.27			1.25			0.03			13.38			0.04			3.35			13.16			0.08			6.55			4.89			0			4.35			0			66.92
8	2015-01-21	120	T. clarkei (big)	F-4	9.26	6.68	1.86	1.31	1.33	0.09	0.023	0.047	0.035	20.91	14.75	3.96	0.76	0.38	0.31	9.25	11.6	9.51	10.97	11.04	4.42	0.16	0.22	0.28	2.99	5.39	3.14	9.11	5.14	2.3	0.18	0.38	0.54	3.96	3.69	1.58	0.01	0.007	0.01	126.41	66.5	36.57
9	2015-01-21	120	T. clarkei (encrusted)	F0	10.86			1.56			0.032			25.86			1.13			24.79			28.7			0.61			7.74			18.59			0.33			22.49			0			191.29
10	2015-01-21	120	T. clarkei (encrusted)	F-1	11.4			1.78			0.042			17.22			1.31			74.49			39.59			1.22			4.43			23.47			0.34			24.84			0.085			204.36
11	2015-01-21	120	T. clarkei (encrusted)	F-2	7.23			1.63			0.037			11.21			0.23			11.78			10.97			0.18			5.77			11.37			0			16.95			0.021			156.41
12	2015-01-21	120	T. clarkei (encrusted)	F-3	10.87			1.73			0.068			18.03			0.6			10.16			19.48			0.35			7.22			17.49			0.34			22.03			0			228.39
13	2015-01-21	120	T. clarkei (encrusted)	F-4	7.67	9.61	1.99	1.83	1.71	0.11	0.045	0.045	0.014	12.66	17	5.75	0.19	0.69	0.51	4.64	25.17	28.55	5.18	20.78	13.77	0.1	0.49	0.45	3.27	5.69	1.87	10.24	16.23	5.46	0	0.2	0.19	8.81	19.02	6.39	0	0.021	0.037	106.81	177.45	47.28
14	2015-01-21	120	G. ruber	F0	3.87			1.47			0.056			9.86			0.1			11.11			6.36			0.1			4.31			4.85			0.28			0.95			0			50.46
15	2015-01-21	120	G. ruber	F-1	X			1.6			0.1			42.73			1.12			22.22			33.13			0.45			3.17			13.01			0			3.58			0			80.91
16	2015-01-21	120	G. ruber	F-2	7.43	6.32	2.13	1.37	1.48	0.12	0.066	0.074	0.023	10.42	21	18.82	0.03	0.42	0.61	8.42	13.92	7.31	11.72	17.07	14.16	0.1	0.22	0.2	4.91	4.13	0.88	5.57	7.81	4.51	0	0.09	0.16	2.14	2.23	1.32	0	0	0	72.2	67.86	15.68
17	2015-01-21	220	T. clarkei (big)	F0	6.64			1.47			0.042			9.34			0.91			31.79			13.92			0.51			4.03			8.52			0.31			6.35			0			46.89
18	2015-01-21	220	T. clarkei (big)	F-1	6.6			1.4			0.042			14.5			0.15			34.38			9.77			0.12			5.08			4.22			0.31			4.31			0.02			20.27
19	2015-01-21	220	T. clarkei (big)	F-2	7.47			1.41			0.044			11.9			0.27			10.29			14.27			0.1			6.99			6.63			0			6.98			0.01			64.75
20	2015-01-21	220	T. clarkei (big)	F-3	7.41			1.43			0.046			9.77			0.35			8.23			10.94			0.1			3.52			5.58			0			6.28			0.023			40.43
21	2015-01-21	220	T. clarkei (big)	F-4	8.25	7.27	0.68	0.94	1.33	0.22	0.038	0.042	0.003	15.82	12.26	2.85	1.9	0.71	0.72	34.69	23.88	13.41	9.13	11.61	2.37	0.68	0.3	0.28	2.89	4.5	1.61	5.32	6.06	1.62	0	0.12	0.17	4.59	5.7	1.18	0.033	0.017	0.013	31.4	40.75	16.74
22	2015-01-21	220	T. clarkei (encrusted)	F0	9.09			1.33			0.055			16.48			2.24			24.42			18.85			0.58			7.89			10.66			0			11.81			0			83.52
23	2015-01-21	220	T. clarkei (encrusted)	F-1	10.76			1.38			0.042			18.68			2.91			42.65			6.68			0.47			2.76			10.09			0			17.34			0.024			61.17
24	2015-01-21	220	T. clarkei (encrusted)	F-2	6.38			1.3			0.039			13.49			0.2			4.09			7.65			0.09			0.42			3.38			0			5.3			0			41.03
25	2015-01-21	220	T. clarkei (encrusted)	F-3	9.02			1.38			0.015			25.95			0.22			5.16			5.37			0.19			9.86			8.62			0.15			6.26			0.017			116.31
26	2015-01-21	220	T. clarkei (encrusted)	F-4	8.49	8.75	1.57	1.43	1.36	0.05	0.045	0.039	0.015	18.25	18.57	4.6	1.37	1.39	1.21	20.24	19.31	15.84	27.8	13.27	9.74	0.5	0.37	0.21	2.12	4.61	4.05	5.11	7.57	3.19	0	0.03	0.07	7.82	9.71	4.93	0.019	0.012	0.011	85.54	77.51	28.3
27	2015-01-21	220	G. ruber	F0	3.62			1.38			0.042			10.28			0.02			4.93			20.27			0.11			4.18			3.38			0.26			12.61			0			21.65
28	2015-01-21	220	G. ruber	F-1	4.83			1.33			0.045			10.16			0.05			3.88			9.21			0.06			4.52			2.42			0.22			9.19			0			33.01
29	2015-01-21	220	G. ruber	F-2	5.68	4.71	1.04	1.3	1.34	0.04	0.052	0.046	0.005	12.21	10.89	1.15	0.02	0.03	0.02	10.04	6.28	3.29	9.24	12.91	6.38	0.04	0.07	0.04	2.19	3.63	1.26	3.63	3.14	0.64	0	0.16	0.14	8.96	10.25	2.04	0	0	0	61.63	38.76	20.6
30	2015-01-21	340	T. clarkei (big)	F0	X			1.58			0.039			28.98			7.75			236.52			65.76			4.53			5.35			22.09			0.62			4.95			0.628			114.51
31	2015-01-21	340	T. clarkei (big)	F-1	5.07			1.91			0.026			10.72			0.77			22.17			32.97			0.51			3.14			11.09			0			1.85			0			51.73
32	2015-01-21	340	T. clarkei (big)	F-2	4.91			1.22			0.016			8.99			0.46			7.91			15.19			0.02			5.01			3.52			0			2.28			0			68.44
33	2015-01-21	340	T. clarkei (big)	F-3	5.17			1.62			0.033			9.98			0.12			12.71			14.54			0.1			7.89			3.2			0.25			2.52			0			35.77
34	2015-01-21	340	T. clarkei (big)	F-4	7.18	5.59	1.07	1.43	1.55	0.25	0.032	0.029	0.009	9.13	13.56	8.65	1.6	2.14	3.18	29.52	61.77	98.05	13.31	28.35	22.42	0.67	1.17	1.9	2.08	4.69	2.24	3.36	8.65	8.22	0.14	0.2	0.26	1.63	2.65	1.33	0.374	0.2	0.289	52.5	64.59	30.21
35	2015-01-21	340	T. clarkei (encrusted)	F0	8.45			1.31			0.015			10.31			1.03			9.25			10.76			0.44			7.88			10.49			0.53			3.23			0.039			36.31
36	2015-01-21	340	T. clarkei (encrusted)	F-1	5.41			1.38			0.027			9.89			0.13			0			9.84			0.09			7.64			6.33			0			1.69			0			46.9
37	2015-01-21	340	T. clarkei (encrusted)	F-2	5.97			1.38			0.031			9.37			0.17			29.93			14.2			0.13			9.36			9.17			0.23			1.93			0			35.1
38	2015-01-21	340	T. clarkei (encrusted)	F-3	9.17			1.48			0.024			19.2			1.2			X			18.68			1.01			9.23			12.82			0.35			3.06			0.044			182.91
39	2015-01-21	340	T. clarkei (encrusted)	F-4	7.77	7.35	1.61	1.31	1.37	0.07	0.032	0.026	0.007	16.52	13.06	4.5	0.99	0.7	0.51	20.99	15.04	13.13	25.89	15.87	6.59	0.26	0.39	0.37	7.25	8.27	0.96	18	11.36	4.39	0.31	0.28	0.19	2.42	2.47	0.68	0.121	0.041	0.049	49.35	70.11	63.37
40	2015-01-21	450	T. clarkei (big)	F0	11.41			1.55			0.042			22.27			1.15			47.5			28.59			1.22			1.68			25.38			0.18			3.51			0			112.81
41	2015-01-21	450	T. clarkei (big)	F-1	12.58			1.53			0.047			34.88			1.04			4.58			48.26			0.23			4.31			48.97			0.61			6.67			0.027			112.26
42	2015-01-21	450	T. clarkei (big)	F-2	19.95			1.47			0.06			24.73			1.58			16.98			59.18			1.05			6.27			39.43			0.3			6.06			0.03			233.21
43	2015-01-21	450	T. clarkei (big)	F-3	13.39	14.33	3.83	1.57	1.53	0.04	0.04	0.047	0.009	23.64	26.38	5.75	0.26	1.01	0.55	0	17.27	21.4	31.15	41.8	14.51	0.24	0.68	0.52	13.48	6.44	5.06	28	35.44	10.88	0.41	0.38	0.18	3.4	4.91	1.7	0	0.014	0.017	46.82	126.27	77.73
44	2015-01-21	450	T. clarkei (encrusted)	F0	9.17			1.45			0.026			14.92			0.81			18.56			13.32			0.61			1.76			13.03			0.13			2.54			0.173			26.48
45	2015-01-21	450	T. clarkei (encrusted)	F-1	14.58			1.52			0.033			34.93			1.29			27.72			41.1			0.51			6.09			27.21			0.67			5.58			0.041			82.77
46	2015-01-21	450	T. clarkei (encrusted)	F-2	13.45			1.54			0.024			35.88			0.81			18.03			33.86			0.18			0			27.07			0			3.35			0.049			72.33
47	2015-01-21	450	T. clarkei (encrusted)	F-3	9.92			1.58			0.036			21.31			2.22			95.48			23			0.59			7.51			19.21			0.24			4.38			0.027			42.29
48	2015-01-21	450	T. clarkei (encrusted)	F-4	10.6	11.54	2.35	1.38	1.49	0.08	0.051	0.034	0.011	18.09	25.02	9.74	3.18	1.66	1.03	121.1	56.18	48.58	26.51	27.56	10.58	1.16	0.61	0.36	9.93	5.06	4.1	15.55	20.41	6.52	0.29	0.27	0.25	2.64	3.7	1.28	0.064	0.071	0.059	102.98	65.37	30.87
49	2015-01-21	450	G. ruber	F0	6.4			1.45			0.131			13.21			1.28			46.39			9.14			0.37			5.94			4.9			0.3			1.38			0.05			76.8
50	2015-01-21	450	G. ruber	F-1	8.64			1.38			0.229			15.37			0.17			3.84			22.28			0.12			0			2.39			0.27			0.86			0			44.92
51	2015-01-21	450	G. ruber	F-2	5.09	6.71	1.79	1.3	1.38	0.08	0.086	0.149	0.073	11.18	13.25	2.1	0.03	0.49	0.68	25.98	25.4	21.28	4.29	11.91	9.31	0.12	0.2	0.15	8.98	4.97	4.57	1.67	2.99	1.69	0.64	0.4	0.2	0.49	0.91	0.45	0	0.017	0.029	31.3	51.01	23.35
52	2015-01-21	570	T. clarkei (big)	F0	39.98			1.49			0.067			151.84			1.99			79.17			53.47			0.27			3.62			40.36			0.68			8.55			0.061			197.32
53	2015-01-21	570	T. clarkei (big)	F-1	23.87			1.55			0.069			53.36			0.56			6.86			79.83			0.21			4.97			41.25			0.38			11.81			0.017			97.83
54	2015-01-21	570	T. clarkei (big)	F-2	21.79			1.44			0.038			46.88			0.31			13.6			49.14			0.12			2.08			30.27			0.18			11.26			0			81.9
55	2015-01-21	570	T. clarkei (big)	F-3	45.12			1.46			0.064			144.81			2.44			24.11			59.21			0.74			12.47			58.04			0.22			14.93			0.078			195.45
56	2015-01-21	570	T. clarkei (big)	F-4	33.42	32.84	10.06	1.61	1.51	0.07	0.086	0.065	0.017	114.7	102.32	49.7	0.91	1.24	0.93	7.91	26.33	30.32	117.53	71.84	28.13	0.69	0.41	0.29	16.72	7.97	6.31	112.5	56.48	32.86	0.23	0.34	0.2	23.89	14.09	5.93	0.075	0.046	0.035	186.9	151.88	57.03
57	2015-01-21	570	T. clarkei (encrusted)	F0	6.9			1.39			0.042			10.13			0.34			14.72			13.29			0.06			5.46			6.65			0			2.89			0			36.05
58	2015-01-21	570	T. clarkei (encrusted)	F-1	9.19			1.4			0.058			7.87			0.77			21.48			35.71			0.33			7.47			15.13			0.31			5.22			0			36.31
59	2015-01-21	570	T. clarkei (encrusted)	F-2	6.05			1.39			0.05			7.25			0.11			1.98			6.91			0.11			3.99			5.57			0.26			2.74			0.02			25.77
60	2015-01-21	570	T. clarkei (encrusted)	F-3	5.9	7.01	1.52	1.45	1.41	0.03	0.053	0.051	0.007	8.08	8.33	1.25	0.04	0.31	0.33	0	9.54	10.29	5.21	15.28	14.05	0.09	0.15	0.13	0	4.23	3.16	4.01	7.84	4.98	0.18	0.19	0.14	2.03	3.22	1.38	0	0.005	0.01	25.75	30.97	6.01
61	2015-01-21	570	G. ruber	F0	4.03			1.31			0.026			8.36			0.07			24.15			12.38			0.13			3.81			2.29			0.2			0.66			0			33.93
62	2015-01-21	570	G. ruber	F-1	7.35			1.34			0.079			12.17			0.07			6.74			10.74			0.24			10.14			3.11			0			0.35			0			0
63	2015-01-21	570	G. ruber	F-2	6.39	5.93	1.71	1.25	1.3	0.05	0.042	0.049	0.027	11.8	10.78	2.1	0.42	0.19	0.2	6.06	12.31	10.25	16.09	13.07	2.74	0.25	0.21	0.07	4.79	6.25	3.4	2.82	2.74	0.41	0.14	0.11	0.1	0.52	0.51	0.15	0.065	0.022	0.037	49.93	27.95	25.5
64	2015-02-17	120	T. clarkei (big)	F0	11.8			1.53			0.114			25.26			0.51			35.89			16.48			0.07			7.91			8.28			0			8.19			0.01			21.02
65	2015-02-17	120	T. clarkei (big)	F-1	10.4			1.47			0.114			31.02			0.38			19.61			13.52			0			8.46			14.44			0.34			6.73			0.029			28.78
66	2015-02-17	120	T. clarkei (big)	F-2	14.87			1.38			0.099			21			0.29			11.4			29.66			0.04			6.32			15.1			0			10.18			0.012			101.91
67	2015-02-17	120	T. clarkei (big)	F-3	10.47	11.89	2.09	1.57	1.49	0.08	0.105	0.108	0.007	18.94	24.05	5.34	0.21	0.35	0.13	11.71	19.66	11.47	15.85	18.87	7.3	0.37	0.12	0.17	11.13	8.45	2	10.51	12.08	3.24	0.04	0.09	0.16	8.2	8.32	1.42	0	0.013	0.012	95.35	61.77	42.77
68	2015-02-17	120	T. clarkei (encrusted)	F0	6.06			1.53			0.062			13.95			0.28			5.62			11.13			0.16			0			13.55			0.04			10.79			0			21.94
69	2015-02-17	120	T. clarkei (encrusted)	F-1	6.78			1.53			0.063			15.38			0.16			6.79			15.26			0.16			2.58			12.76			0.04			17.7			0			39.58
70	2015-02-17	120	T. clarkei (encrusted)	F-2	8.66			1.55			0.062			17.53			0.19			11.31			50.2			0.16			0			10.22			0.03			16.25			0			40.41
71	2015-02-17	120	T. clarkei (encrusted)	F-3	4.95	6.61	1.56	1.33	1.48	0.1	0.04	0.057	0.011	10.74	14.4	2.85	0.09	0.18	0.08	0.81	6.13	4.32	6.97	20.89	19.83	0.11	0.15	0.03	0	0.64	1.29	4.03	10.14	4.31	0.04	0.04	0.01	7.05	12.95	4.93	0	0	0	32.84	33.69	8.54
72	2015-02-17	120	G. ruber	F0	4.53			1.45			0.039			8.15			0.04			7			3.43			0.1			7.4			2.03			0.1			0.92			0			24.93
73	2015-02-17	120	G. ruber	F-1	5.65			1.43			0.04			8.15			0.08			7.26			3.54			0.07			0			3.14			0.13			0.95			0			16.52
74	2015-02-17	120	G. ruber	F-2	5.8	5.33	0.69	1.47	1.45	0.02	0.044	0.041	0.003	7.96	8.09	0.11	0.06	0.06	0.02	11.89	8.72	2.75	4.61	3.86	0.65	0	0.06	0.05	1.28	2.89	3.96	2.71	2.63	0.56	0.26	0.16	0.09	1.06	0.97	0.07	0	0	0	15.68	19.04	5.12
75	2015-02-17	220	T. clarkei (big)	F0	9.78			1.55			0.048			12.8			0.28			6.08			11.68			0.15			0			8.26			0			3.95			0			24.4
76	2015-02-17	220	T. clarkei (big)	F-1	8.41			1.37			0.073			11.51			0.17			17.18			15.58			0.38			0			5			0			3.41			0			19.95
77	2015-02-17	220	T. clarkei (big)	F-2	6.56	8.25	1.62	1.45	1.46	0.09	0.049	0.057	0.014	11.15	11.82	0.87	0.29	0.25	0.06	13.89	12.38	5.7	10.25	12.5	2.76	0.22	0.25	0.12	0	0	0	4.6	5.95	2.01	0.1	0.03	0.06	2.61	3.32	0.67	0.003	0.001	0.002	17.87	20.74	3.33
78	2015-02-17	220	T. clarkei (encrusted)	F0	9.58			1.45			0.036			11.1			0.25			10.68			10.37			0.18			10.56			5.06			0.28			1.4			0.026			15.8
79	2015-02-17	220	T. clarkei (encrusted)	F-1	4.54			1.33			0.028			10.99			0.42			51.03			8.12			0.25			2.84			3.19			0.29			2.36			0.022			24.11
80	2015-02-17	220	T. clarkei (encrusted)	F-2	5.87	6.66	2.61	1.49	1.43	0.08	0.041	0.035	0.007	14.26	12.12	1.86	0.32	0.33	0.09	14.43	25.38	22.29	5.92	8.14	2.22	0.18	0.2	0.04	1.36	4.92	4.94	3.56	3.94	0.99	0	0.19	0.16	1.83	1.86	0.48	0.018	0.022	0.004	41.68	27.2	13.21
81	2015-02-17	220	G. ruber	F0	4.26			1.39			0.053			10.49			0.25			8.5			3			0.09			0			1.57			0			0.49			0			4.48
82	2015-02-17	220	G. ruber	F-1	4.93			1.42			0.054			10.31			0.11			11.05			5.76			0.1			0			3.25			0.04			0.54			0.005			9.14
83	2015-02-17	220	G. ruber	F-2	5.21	4.8	0.49	1.38	1.4	0.02	0.054	0.054	0	11.06	10.62	0.39	0.01	0.12	0.12	5.15	8.23	2.95	4.37	4.37	1.38	0.12	0.1	0.02	0	0	0	3.05	2.62	0.92	0	0.01	0.03	1.12	0.71	0.35	0	0.002	0.003	19.49	11.04	7.68
84	2015-02-17	340	T. clarkei (big)	F0	9.83			1.45			0.075			26.67			0.15			40.5			19.25			0.05			11.53			12.03			0			4.58			0			11.02
85	2015-02-17	340	T. clarkei (big)	F-1	5.54			1.4			0.068			10.31			0.16			104.32			24.19			0.04			4.57			16.93			0.29			4.32			0.006			31.03
86	2015-02-17	340	T. clarkei (big)	F-2	6.14			1.59			0.078			16.41			0.39			X			36.1			0.23			7.25			18.93			0.14			7.19			0.007			81.09
87	2015-02-17	340	T. clarkei (big)	F-3	7.09			1.5			0.077			15.38			0.1			11.12			27.52			0.1			0			13.21			0			5.08			0.009			27.76
88	2015-02-17	340	T. clarkei (big)	F-4	7.47	7.22	1.65	1.53	1.49	0.07	0.093	0.078	0.009	14.84	16.72	6.03	0.08	0.18	0.12	13.62	42.39	43.37	36.74	28.76	7.59	0.07	0.1	0.08	1.27	4.92	4.66	13.64	14.95	2.87	0.17	0.12	0.12	5.64	5.36	1.14	0	0.004	0.004	33.13	36.81	26.24
89	2015-02-17	340	T. clarkei (encrusted)	F0	X			1.42			0.099			30.59			0.52			16.06			27			0.19			10.12			15.82			0.46			8.33			0.007			27.55
90	2015-02-17	340	T. clarkei (encrusted)	F-1	5.42			1.49			0.039			7.93			0.34			23.82			19.36			0.12			2.06			5.51			0.11			5.61			0.01			63.06
91	2015-02-17	340	T. clarkei (encrusted)	F-2	5.96	5.69	0.39	1.52	1.48	0.05	0.048	0.062	0.032	10.42	16.31	12.43	0.11	0.32	0.2	3.64	14.51	10.18	30.88	25.75	5.86	0.04	0.12	0.08	0	4.06	5.35	5.85	9.06	5.85	0.2	0.26	0.18	8.38	7.44	1.58	0.004	0.007	0.003	32.03	40.88	19.34
92	2015-02-17	340	G. ruber	F0	6.03			1.58			0.069			21.69			0.17			6.81			7.88			0.23			4.56			2.62			0			4.26			0.004			45.05
93	2015-02-17	340	G. ruber	F-1	6.81	6.42	0.55	1.68	1.63	0.07	0.057	0.063	0.009	9.49	15.59	8.62	0.59	0.38	0.3	X	6.81	0	10.37	9.12	1.76	0.24	0.24	0	4.11	4.34	0.32	5.07	3.84	1.73	0.02	0.01	0.02	6.05	5.15	1.27	0	0.002	0.003	33.88	39.46	7.9
94	2015-02-17	450	T. clarkei (big)	F0	5.96			2.01			0.054			18.04			1.58			17.49			45.78			0.48			0			5.57			0			12.87			0.013			52.07
95	2015-02-17	450	T. clarkei (big)	F-1	8.77			1.58			0.083			32.72			1.07			90.9			83.83			0.61			6.66			8.7			0.24			16.26			0.025			73.95
96	2015-02-17	450	T. clarkei (big)	F-2	5.79			1.46			0.029			16.33			0.2			25.54			34.75			0.08			3.65			4.94			0.43			9.3			0			34.42
97	2015-02-17	450	T. clarkei (big)	F-3	5.25	6.44	1.58	1.44	1.62	0.27	0.043	0.052	0.023	12.34	19.86	8.9	0.29	0.78	0.66	3.06	34.25	38.9	74.53	59.72	23.23	0.07	0.31	0.28	0.79	2.77	3.03	5.41	6.15	1.72	0	0.17	0.21	14.1	13.13	2.91	0	0.009	0.012	12.63	43.27	26.05
98	2015-02-17	450	T. clarkei (encrusted)	F0	14.09			1.34			0.039			31.88			0.62			2.21			25.74			0.19			2.9			19.62			0.11			4.9			0.008			42.79
99	2015-02-17	450	T. clarkei (encrusted)	F-2	11.3			1.58			0.036			31.11			0.49			13.33			35.41			0.1			7.82			9.74			0.04			8.54			0.039			17.92
100	2015-02-17	450	T. clarkei (encrusted)	F-3	7.13	10.84	3.5	1.81	1.58	0.23	0.041	0.038	0.003	13.32	25.43	10.5	0.26	0.46	0.18	6.43	7.32	5.61	43.34	34.83	8.82	0.24	0.18	0.07	7.79	6.17	2.83	6.87	12.08	6.69	0	0.05	0.05	12.94	8.79	4.03	0.011	0.019	0.017	49.85	36.85	16.77
101	2015-02-17	450	G. ruber	F0	4.11			1.44			0.059			7.92			0.1			5.86			5.9			0.19			5.31			2.13			0.03			0.42			0			19.48
102	2015-02-17	450	G. ruber	F-1	4.38			1.48			0.053			9.92			0.16			19.94			8.75			0.28			2.37			1.36			6.12			0.33			0.039			41.62
103	2015-02-17	450	G. ruber	F-2	4.22	4.23	0.14	1.43	1.45	0.03	0.06	0.057	0.004	9.86	9.23	1.14	0.2	0.15	0.05	21.32	15.71	8.55	5.63	6.76	1.73	0.13	0.2	0.07	6.19	4.63	2	2.16	1.88	0.45	0.42	2.19	3.41	0.22	0.33	0.1	0.001	0.013	0.022	20.78	27.29	12.43
104	2015-02-17	570	T. clarkei (big)	F0	21.54			1.56			0.077			33.54			0.99			56.76			48.47			0.22			1.33			37.89			0.21			10.3			0.037			87.88
105	2015-02-17	570	T. clarkei (big)	F-1	21.41			1.56			0.053			X			2.42			52.3			41.89			0.65			10.17			18.53			0.21			4.43			0.099			103.27
106	2015-02-17	570	T. clarkei (big)	F-2	11.08			1.83			0.046			46.2			2.12			27.17			51.12			0.76			0			14.77			0.07			7.28			0.025			16.5
107	2015-02-17	570	T. clarkei (big)	F-3	6.57	15.15	7.53	1.17	1.53	0.27	0.029	0.051	0.02	27.04	35.59	9.74	0.19	1.43	1.03	6.91	35.78	23.24	39.79	45.32	5.35	0.2	0.46	0.29	5.94	4.36	4.63	5.44	19.16	13.65	0.18	0.17	0.07	4.2	6.55	2.86	0.017	0.045	0.037	30.06	59.43	42.57
108	2015-02-17	570	T. clarkei (encrusted)	F0	10.45			1.62			0.065			25.24			3.08			X			52.89			0.86			5.12			25.14			1.48			9.25			0.572			109.39
109	2015-02-17	570	T. clarkei (encrusted)	F-1	6.59			1.47			0.046			13.38			1.71			19.84			23.82			0.36			5.58			6.57			0.1			4.57			0.005			22.76
110	2015-02-17	570	T. clarkei (encrusted)	F-2	6.13			1.45			0.031			12.29			0.18			3.1			26.9			0.05			6.65			5.41			0.02			2.19			0.005			11.88
111	2015-02-17	570	T. clarkei (encrusted)	F-3	6.75	7.48	2	1.48	1.5	0.08	0.042	0.046	0.014	15.98	16.72	5.89	0.13	1.28	1.41	40.42	21.12	18.69	44.85	37.11	14.02	0	0.32	0.39	10.06	6.85	2.23	6.39	10.88	9.52	0	0.4	0.72	3.26	4.82	3.11	0	0.145	0.284	0	36.01	49.8
112	2015-02-17	570	G. ruber	F0	4.09			1.5			0.065			9.83			0.18			23.06			6.97			0.14			6.38			2.48			0.02			0.8			0.004			16.48
113	2015-02-17	570	G. ruber	F-1	5.66			1.49			0.063			9.82			0.06			5			6.27			0.11			6.42			2.23			0.03			0.85			0.003			21.95
114	2015-02-17	570	G. ruber	F-2	5.12	4.96	0.8	1.41	1.47	0.05	0.068	0.066	0.002	9.92	9.86	0.06	0.05	0.1	0.07	8.93	12.33	9.49	6.84	6.69	0.37	0.11	0.12	0.02	6.57	6.46	0.1	1.2	1.97	0.68	0	0.02	0.02	0.52	0.72	0.18	0	0.002	0.002	23.29	20.57	3.61
115	2015-03-13	120	T. clarkei (big)	F0	31.18			2.37			0.174			45.28			4.31			107.43			84.97			1.43			3.75			59.23			0			73.25			0.075			340.51
116	2015-03-13	120	T. clarkei (big)	F-1	12.2			1.87			0.062			30.17			2.23			16.43			43.66			0.63			3			44.34			0.68			76.15			0.087			57.91
117	2015-03-13	120	T. clarkei (big)	F-2	77.02			1.32			0.06			276.59			8.49			309.27			60.01			0.33			9.48			77.57			3.82			29.41			0.529			431.37
118	2015-03-13	120	T. clarkei (big)	F-3	44.24			1.37			0.122			213.49			4.31			58.89			37.69			0.14			0			129.02			2.2			18.12			0.256			59.62
119	2015-03-13	120	T. clarkei (big)	F-4	38.67	40.66	23.66	1.68	1.72	0.43	0.191	0.122	0.061	128.15	138.73	106.33	4.47	4.76	2.28	80.29	114.46	113.87	51.37	55.54	18.46	0.16	0.54	0.54	13.02	5.85	5.27	54.67	72.97	33.56	2.82	1.91	1.56	18.04	43	29.33	0.233	0.236	0.183	242.81	226.44	166.96
120	2015-03-13	220	T. clarkei (big)	F0	39.45			1.43			0.062			103.76			3.82			137.87			18.81			0.24			0			28.92			0			7.05			0.136			148.41
121	2015-03-13	220	T. clarkei (big)	F-1	29.24			1.57			0.056			84.09			5.9			117.04			39.88			0.96			1.48			47.51			0			8.52			0.175			100.51
122	2015-03-13	220	T. clarkei (big)	F-2	34.78			1.34			0.062			127.35			3.15			115.46			36.25			1.2			5.46			X			0.47			12.82			0.237			89.06
123	2015-03-13	220	T. clarkei (big)	F-3	6.08			1.53			0.039			19.52			0.11			2.5			33.48			0.17			3.82			21.85			0			14.06			0			54.2
124	2015-03-13	220	T. clarkei (big)	F-4	7.38	23.38	15.63	1.59	1.49	0.1	0.049	0.054	0.01	16.44	70.23	50.11	0.79	2.76	2.35	19.42	78.46	62.54	24.67	30.62	8.67	0.12	0.54	0.5	2.48	2.65	2.1	23.5	30.45	11.77	0	0.09	0.21	15.31	11.55	3.59	0	0.109	0.106	38.45	86.13	42.97
125	2015-03-13	340	T. clarkei (big)	F0	5.87			2.23			0.067			8.76			0.5			25.87			24.87			0.23			0.86			11.82			0			13.28			0			0
126	2015-03-13	340	T. clarkei (big)	F-1	5.84			1.68			0.08			11.56			1.62			300.52			31.55			0.45			1.11			21.59			0			12.54			0.045			0
127	2015-03-13	340	T. clarkei (big)	F-2	13.14			1.54			0.093			32.5			1.27			19.08			26.98			0.27			3.11			17.87			0.23			13.8			0			61.89
128	2015-03-13	340	T. clarkei (big)	F-3	10.07	8.73	3.55	1.58	1.76	0.32	0.069	0.077	0.012	21.72	18.64	10.79	0.65	1.01	0.52	18.64	91.03	139.7	21.91	26.32	4.06	0.12	0.27	0.14	2.91	2	1.18	26.9	19.55	6.35	0.28	0.13	0.15	10.21	12.46	1.59	0.033	0.02	0.023	69.76	32.91	38.14
129	2015-03-13	450	T. clarkei (big)	F0	28.3			1.32			0.164			46.41			X			X			251.18			X			7.13			246.54			2.66			5.78			0.265			306.51
130	2015-03-13	450	T. clarkei (big)	F-1	7.8			1.68			0.054			11.77			7.45			261.74			40.5			3.8			4.72			21.18			1.02			7.34			0.133			55.35
131	2015-03-13	450	T. clarkei (big)	F-2	5.23			1.7			0.053			10.43			1.27			14.99			30.19			0.56			1.78			13.92			0.33			5.69			0.155			20.55
132	2015-03-13	450	T. clarkei (big)	F-3	13.71			1.56			0.07			11.05			12.13			X			147.34			9.38			2.05			54.5			8.7			7.5			0.13			448.45
133	2015-03-13	450	T. clarkei (big)	F-4	6.66	12.34	9.49	1.71	1.6	0.17	0.058	0.08	0.047	10.4	18.01	15.89	2.49	5.83	4.97	72.5	116.41	129.1	86.63	111.17	90.92	0.8	3.63	4.1	1.31	3.4	2.48	22.39	71.71	98.98	1.28	2.8	3.41	5.83	6.43	0.91	0.106	0.158	0.063	46.03	175.38	191.62
134	2015-03-13	570	T. clarkei (big)	F0	23.4			2.39			0.135			50.41			9.58			359.87			196.81			3.29			6.92			53.37			2.43			24.25			0.045			0
135	2015-03-13	570	T. clarkei (big)	F-1	12.02			1.5			0.074			37.99			0.66			22.51			41.18			0.11			3.16			25.09			0.39			5.94			0.039			48.59
136	2015-03-13	570	T. clarkei (big)	F-2	13.35			1.6			0.097			27.3			0.81			7.16			66.13			0.38			0.78			22.78			0			9.69			0.028			94.27
137	2015-03-13	570	T. clarkei (big)	F-3	12.28			1.86			0.173			24.38			7.32			164.75			124.8			1.71			5.89			41.59			0.26			26.8			0.074			174.86
138	2015-03-13	570	T. clarkei (big)	F-4	14.77	15.16	4.73	X	1.84	0.4	0.101	0.116	0.039	X	33.05	11.14	4.59	4.59	3.94	42.27	119.31	148.17	211.89	128.16	76.07	2.99	1.69	1.46	X	14.61	23.42	X	35.71	14.45	0	0.62	1.03	X	16.67	10.39	0	0.037	0.027	524.97	168.54	209.4
139	2015-03-13	120	T. clarkei (encrusted)	F0	7.51			1.99			0.071			9.69			3.03			59.71			17.75			0.88			2.59			19.32			0.49			17.3			0.024			30.42
140	2015-03-13	120	T. clarkei (encrusted)	F-1	7.17			1.94			0.038			7.29			1.43			21.5			18.91			0.67			1.9			8.88			1.01			9.79			0.046			163.35
141	2015-03-13	120	T. clarkei (encrusted)	F-2	8.39			1.82			0.046			20.7			1.28			22.95			21.49			0.53			2.94			7.53			0.5			8.47			0.037			41.4
142	2015-03-13	120	T. clarkei (encrusted)	F-3	6.86	7.48	0.66	1.7	1.86	0.13	0.041	0.049	0.015	13.84	12.88	5.87	0.26	1.5	1.15	15.08	29.81	20.22	7.47	16.41	6.16	0.15	0.56	0.31	2.18	2.4	0.46	5.13	10.22	6.26	0.23	0.56	0.33	5.27	10.21	5.09	0.017	0.031	0.013	0	58.79	71.87
143	2015-03-13	220	T. clarkei (encrusted)	F0	34.4			1.64			0.144			100.65			2			124.35			38.38			0.38			3.03			74.79			0.8			19.52			0.068			147.32
144	2015-03-13	220	T. clarkei (encrusted)	F-1	22.65			1.87			0.156			51.66			2.32			109.8			53.24			0.28			4.28			97.75			0			18.14			0			94.62
145	2015-03-13	220	T. clarkei (encrusted)	F-2	29.16			2.08			0.115			38.95			3.82			506.39			62.81			1.24			4.01			171.41			0.34			63.75			0.064			106.73
146	2015-03-13	220	T. clarkei (encrusted)	F-3	23.49			1.97			0.149			35.36			5.66			602.74			42.87			1.52			2.43			82			0.8			27.98			0.049			122.42
147	2015-03-13	220	T. clarkei (encrusted)	F-4	17.69	25.48	6.44	1.56	1.83	0.22	0.078	0.128	0.032	28.13	50.95	29.06	5.31	3.82	1.67	68.71	282.4	251.6	22.97	44.05	15.12	0.31	0.75	0.59	1.3	3.01	1.21	137.16	112.62	40.77	0	0.39	0.4	13.34	28.55	20.37	0.101	0.056	0.037	40.22	102.26	39.89
148	2015-03-13	340	T. clarkei (encrusted)	F0	9.66			1.82			0.071			22.3			6.05			157.61			59.33			1.86			2.52			31.01			1.61			46.37			0.075			34.08
149	2015-03-13	340	T. clarkei (encrusted)	F-1	50.36			1.23			0.062			168.19			10.91			173.09			83.95			2.34			4.96			91.89			1.23			17.88			0.493			31.39
150	2015-03-13	340	T. clarkei (encrusted)	F-2	34.75			1.85			0.064			128.07			6.22			102.54			92.51			0.96			3.71			50.2			0			43.33			0.301			227.03
151	2015-03-13	340	T. clarkei (encrusted)	F-3	15.86	27.66	18.52	1.46	1.59	0.3	0.062	0.065	0.004	66.63	96.3	64.64	1.81	6.25	3.72	15.53	112.19	71.2	75.92	77.93	14.13	0.18	1.33	0.96	0	2.8	2.11	31.21	51.08	28.65	1.45	1.07	0.73	22.24	32.46	14.48	0.156	0.256	0.183	103.4	98.98	91.64
152	2015-03-13	450	T. clarkei (encrusted)	F0	7.88			1.65			0.06			29.44			0.22			16.54			25.61			0.2			2.02			10.11			0.64			6.84			0.038			0
153	2015-03-13	450	T. clarkei (encrusted)	F-1	5.31			1.67			0.079			12.41			0.14			7.3			99.4			0.1			1.17			12.86			0.26			8.76			0			68.56
154	2015-03-13	450	T. clarkei (encrusted)	F-2	8.08			1.53			0.1			19.06			0.18			37.7			67.96			0.16			1.71			14.96			0			4.77			0			118.7
155	2015-03-13	450	T. clarkei (encrusted)	F-3	6.19	6.87	1.34	1.76	1.65	0.09	0.052	0.073	0.022	13.92	18.71	7.7	0.33	0.22	0.08	8.53	17.52	14.06	20.27	53.31	37.41	0.08	0.13	0.06	1.2	1.53	0.41	10.75	12.17	2.2	0.27	0.29	0.26	4.46	6.21	2	0	0.01	0.019	41.4	57.17	49.78
156	2015-03-13	570	T. clarkei (encrusted)	F0	39.99			1.55			X			176.91			16.55			161.58			80.98			3.28			8.77			62.71			4.45			24.42			0.115			318.68
157	2015-03-13	570	T. clarkei (encrusted)	F-1	38.92			1.78			0.106			154.09			4.77			57.57			57.77			0.18			7.45			53.04			0			6.08			0.316			131.38
158	2015-03-13	570	T. clarkei (encrusted)	F-2	38.61			1.41			0.076			131.79			4.81			82.63			100.13			0.24			1.73			55.96			2.17			6.32			0.106			165.16
159	2015-03-13	570	T. clarkei (encrusted)	F-3	20.77	34.57	9.22	1.83	1.64	0.2	0.133	0.105	0.028	73.06	133.96	44.58	1.6	6.93	6.58	157.41	114.8	52.64	69.34	77.05	18.06	0.3	1	1.52	3.66	5.4	3.27	39.51	52.81	9.74	1.02	1.91	1.91	11.61	12.11	8.6	0.223	0.19	0.1	70.03	171.31	105.84
160	2015-03-13	120	G. ruber	F0	4.53			1.75			0.104			10.54			0.1			26.26			6.48			0.07			1.91			10.5			1.23			2.36			0.031			0
161	2015-03-13	120	G. ruber	F-1	7.04			1.7			0.084			10.48			0.08			14.12			11.08			0.09			3.02			10.27			0.68			2.36			0			47.9
162	2015-03-13	120	G. ruber	F-2	7.17	6.25	1.49	1.65	1.7	0.05	0.095	0.095	0.01	13.6	11.54	1.79	0.2	0.12	0.06	74.05	38.14	31.68	19.55	12.37	6.63	0.07	0.08	0.01	9.08	4.67	3.86	18.27	13.01	4.55	0.17	0.69	0.53	3.29	2.67	0.54	0.042	0.024	0.022	109.89	52.6	55.09
163	2015-03-13	220	G. ruber	F0	4.84			1.58			0.095			11.93			0.27			91.94			19.67			0.17			3.62			3.56			0			4.74			0			37.46
164	2015-03-13	220	G. ruber	F-1	5.1			1.56			0.187			11.55			0.31			44.36			11.96			0.16			4.91			2.9			0			6.67			0			38.72
165	2015-03-13	220	G. ruber	F-2	5.72	5.22	0.45	1.57	1.57	0.01	0.118	0.133	0.048	12.77	12.08	0.62	0.23	0.27	0.04	69.71	68.67	23.81	15.75	15.79	3.85	0.11	0.15	0.03	3.3	3.94	0.85	3.39	3.28	0.35	0	0	0	7.87	6.43	1.58	0	0	0	40.59	38.93	1.57
166	2015-03-13	340	G. ruber	F0	5.76			1.72			0.081			17.85			3.68			125.35			81.31			0.78			9.28			27.49			1.12			7.55			0.14			205.37
167	2015-03-13	340	G. ruber	F-1	4.63			1.6			0.074			13.95			0.37			75.88			59.5			0.1			6.55			6.51			0			5.11			0			58.23
168	2015-03-13	340	G. ruber	F-2	6.92	5.77	1.15	1.6	1.64	0.07	0.22	0.125	0.082	27.02	19.61	6.71	0.53	1.53	1.87	X	100.61	34.98	64.62	68.48	11.41	0.33	0.4	0.34	6.41	7.41	1.61	11.85	15.29	10.9	0	0.37	0.65	6.54	6.4	1.23	0.1	0.08	0.072	0	87.87	105.85
169	2015-03-13	450	G. ruber	F0	3.97			1.52			0.063			9.49			0.13			42.64			22.48			0.12			1.6			3.09			0			2.41			0.019			32.88
170	2015-03-13	450	G. ruber	F-1	4.39			1.59			0.05			10.22			0.33			29.76			35.68			0.07			2.09			2.41			0			3.12			0.052			79.73
171	2015-03-13	450	G. ruber	F-2	5.61	4.66	0.85	1.45	1.52	0.07	0.079	0.064	0.015	9.91	9.87	0.37	0.11	0.19	0.12	12.44	28.28	15.16	41.9	33.36	9.92	0.07	0.09	0.03	0.78	1.49	0.66	1.94	2.48	0.58	0	0	0	2.74	2.76	0.36	0.037	0.036	0.017	38.08	50.23	25.68
172	2015-03-13	570	G. ruber	F0	3.25			1.59			0.045			8.24			0.21			8.4			24.06			0.16			1.2			2.99			0.27			2.84			0			0
173	2015-03-13	570	G. ruber	F-1	6			1.55			0.07			9.65			0.1			10.05			20.94			0.1			1.74			1.24			0			1.11			0			0
174	2015-03-13	570	G. ruber	F-2	6.06	5.1	1.61	1.58	1.57	0.03	0.094	0.07	0.025	10.19	9.36	1.01	0.1	0.14	0.06	18.15	12.2	5.22	18.77	21.26	2.66	0.08	0.11	0.04	2.47	1.81	0.64	4.19	2.8	1.48	0	0.09	0.16	1.34	1.76	0.94	0	0	0	33.51	11.17	19.35
175	2015-04-09	120	T. clarkei (big)	F0	46.11			2.76			0.326			156.31			4.07			97.75			51.79			0.48			3.79			91.67			0.92			76.74			0.252			357.72
176	2015-04-09	120	T. clarkei (big)	F-1	39.51			1.91			0.285			113.75			3.24			63.1			45.83			0.12			2.07			51.16			0.96			85.72			0.224			415.24
177	2015-04-09	120	T. clarkei (big)	F-2	56.45			1.95			0.32			201.79			5.26			61.57			23.9			0.29			4.9			46.29			1.34			35.17			0.269			616.17
178	2015-04-09	120	T. clarkei (big)	F-3	41.15			1.97			0.233			149.92			3.84			90.82			37.99			0.16			5.78			62.44			0.8			34.51			0.218			173.04
179	2015-04-09	120	T. clarkei (big)	F-4	20.28	40.7	13.19	1.76	2.07	0.4	0.238	0.28	0.044	47.12	133.78	57.67	0.68	3.42	1.7	7.98	64.24	35.37	X	39.88	12.06	X	0.26	0.16	2.66	3.84	1.53	103.94	71.1	25.45	X	1	0.23	22.57	50.94	28.28	0	0.193	0.11	216.74	355.78	176.12
180	2015-04-09	220	T. clarkei (big)	F0	62.7			1.89			0.191			177.21			11.62			300.23			34.35			X			9.73			53.99			1.83			8.21			0.341			384.62
181	2015-04-09	220	T. clarkei (big)	F-1	34.79			1.55			0.08			105.96			3.15			55.29			54.71			0.36			4.42			28.86			0.92			7.58			0.221			104.16
182	2015-04-09	220	T. clarkei (big)	F-2	4.92			1.72			0.063			13.01			0.22			11.03			12.4			0.11			3.05			8.09			0			4.86			0.016			77.3
183	2015-04-09	220	T. clarkei (big)	F-3	5.56			1.65			0.042			10.09			0.25			15.7			14.09			0.15			0.34			4.23			0			23.48			0.012			48.54
184	2015-04-09	220	T. clarkei (big)	F-4	7.81	23.16	25.38	1.87	1.74	0.14	0.08	0.091	0.058	15.65	64.38	74.87	0.46	3.14	4.9	8.12	78.07	125.65	59.15	34.94	21.91	0.17	0.2	0.11	1.46	3.8	3.66	6.39	20.31	21.26	0.34	0.62	0.78	5.98	10.02	7.64	0.046	0.127	0.147	86.62	140.25	138.09
185	2015-04-09	340	T. clarkei (big)	F0	17.62			1.72			0.326			80.99			12.19			497.48			63.69			3.88			11.39			38.8			1.11			7.61			0.345			150.6
186	2015-04-09	340	T. clarkei (big)	F-1	10.37			1.98			0.064			17.45			1.06			27.82			43.92			0.22			1.93			20.79			0.26			7.88			0			48.01
187	2015-04-09	340	T. clarkei (big)	F-2	9.2			1.6			0.058			16.08			1.55			50.71			40.71			0.44			1.94			21.66			0			6.17			0.095			70.92
188	2015-04-09	340	T. clarkei (big)	F-3	45.03			1.63			0.291			148.93			5.43			117.54			17.59			0.39			14.43			77.81			8.12			2.15			0.775			0
189	2015-04-09	340	T. clarkei (big)	F-4	56.5	27.75	21.64	1.61	1.71	0.16	0.188	0.186	0.125	211.58	95.01	85.06	5.78	5.2	4.47	67.18	152.14	195.84	55.87	44.35	17.58	0.78	1.14	1.54	4.34	6.8	5.76	53.52	42.52	23.91	0	1.9	3.51	3.95	5.55	2.46	0.34	0.311	0.3	206.18	95.14	82.56
190	2015-04-09	450	T. clarkei (big)	F0	10.18			1.88			0.096			X			X			X			51.56			X			2.22			X			0.26			9.63			0.037			97.34
191	2015-04-09	450	T. clarkei (big)	F-1	9.91			1.79			0.083			23.68			0.94			25.4			41.03			0.25			1.79			15.72			0			6.29			0.064			69.6
192	2015-04-09	450	T. clarkei (big)	F-2	21.68			2.38			0.16			66.55			2.2			61.44			43.3			0.21			2.24			64.8			0.94			19.04			0.09			132.8
193	2015-04-09	450	T. clarkei (big)	F-3	12.33			1.67			0.087			32.01			0.87			80.33			35			0.3			0.65			16.67			0.32			4.02			0.449			77.57
194	2015-04-09	450	T. clarkei (big)	F-4	19.77	14.77	5.55	1.56	1.85	0.32	0.006	0.087	0.055	72.35	48.65	24.37	1.79	1.45	0.65	80.06	61.81	25.83	24.53	39.09	10.07	0.12	0.22	0.08	0.69	1.52	0.8	24.75	30.48	23.23	0	0.3	0.38	2.56	8.31	6.57	0.138	0.155	0.168	252.04	125.87	74.63
195	2015-04-09	570	T. clarkei (big)	F0	17.88			1.64			0.096			47.29			3.53			27.91			51.08			0.9			5.06			24.75			0			5.14			0.193			126.98
196	2015-04-09	570	T. clarkei (big)	F-1	10.49			1.35			0.061			19.77			3.86			63.48			20.55			0.65			1.74			16.7			0.85			3.78			0			60.57
197	2015-04-09	570	T. clarkei (big)	F-2	11.15			2.27			0.042			31.71			1.8			43.19			15.01			1.48			2.51			14.68			0			2.88			0.127			89.61
198	2015-04-09	570	T. clarkei (big)	F-3	6.66	11.55	4.66	1.76	1.76	0.39	0.054	0.063	0.023	18.02	29.2	13.51	0.23	2.36	1.68	9.75	36.08	22.81	47.79	33.61	18.46	0.23	0.82	0.52	2.3	2.9	1.48	9.29	16.35	6.41	0.32	0.29	0.4	2.14	3.48	1.29	0.042	0.091	0.086	28.41	76.39	41.98
199	2015-04-09	220	T. clarkei (encrusted)	F0	33.31			0.54			X			X			X			X			X			X			X			0			0			0			0			0
200	2015-04-09	220	T. clarkei (encrusted)	F-1	7.53			1.91			0.102			19.15			0.69			36			25			0.2			2.61			18.7			0.27			6.16			0			44.93
201	2015-04-09	220	T. clarkei (encrusted)	F-2	20.68			1.95			0.111			72.12			X			344.13			31.1			1.3			1.84			31.14			2.46			6.12			0.038			84.4
202	2015-04-09	220	T. clarkei (encrusted)	F-3	11.63	18.29	11.42	1.98	1.6	0.7	X	0.106	0.007	21.5	37.59	29.93	3.65	2.17	2.09	3.87	19.93	22.71	65.53	45.26	28.66	4.57	2.39	3.09	X	2.22	0.54	76.14	31.5	32.4	0.24	0.74	1.15	10.33	5.65	4.26	0	0.01	0.019	194.16	80.87	83.02
203	2015-04-09	340	T. clarkei (encrusted)	F0	19.68			1.54			0.144			36.22			X			X			63.9			6.22			5.44			114.49			0.31			19.05			0.143			294.75
204	2015-04-09	340	T. clarkei (encrusted)	F-1	51.22			1.88			0.122			X			X			X			60.46			3.05			4.57			47.26			1.16			19.61			0.319			275.84
205	2015-04-09	340	T. clarkei (encrusted)	F-2	15.17			1.79			0.07			19.87			8.99			187.86			77			1.78			2.2			15.64			0.28			9.44			0.025			81.57
206	2015-04-09	340	T. clarkei (encrusted)	F-3	12.45			1.66			0.098			25.2			2.16			561.43			24.84			0.79			2.29			17.92			0.8			10.63			0.177			85.4
207	2015-04-09	340	T. clarkei (encrusted)	F-4	15.25	22.75	16.12	1.99	1.77	0.18	0.143	0.115	0.032	36.14	29.36	8.17	5.47	5.54	3.41	125.89	291.73	235.62	43.52	53.95	20.18	2.36	2.84	2.06	3.58	3.62	1.41	19.13	42.89	42.06	0	0.51	0.46	8.4	13.42	5.45	0.09	0.151	0.11	163.75	180.26	101.55
208	2015-04-09	450	T. clarkei (encrusted)	F0	11.92			2.09			0.066			21.39			1.19			51.47			19.5			0.29			3.75			26.36			2.93			3.12			0.18			98.91
209	2015-04-09	450	T. clarkei (encrusted)	F-1	7.66			1.93			0.078			13.65			0.52			23.12			13.75			0.27			1.27			7.74			0			1.47			0			49.58
210	2015-04-09	450	T. clarkei (encrusted)	F-2	6.91			1.81			0.076			12.23			0.38			6.82			11.74			0.16			2.8			8.99			0.39			1.56			0			0
211	2015-04-09	450	T. clarkei (encrusted)	F-3	7.24	8.43	2.35	1.83	1.92	0.13	0.057	0.069	0.01	12.47	14.94	4.35	0.14	0.56	0.45	36.37	29.44	19.02	6.88	12.97	5.22	0.14	0.21	0.07	2.32	2.54	1.03	5.13	12.06	9.67	0	0.83	1.41	2.02	2.04	0.76	0.04	0.055	0.086	46.42	48.73	40.41
212	2015-04-09	570	T. clarkei (encrusted)	F0	8.98			1.98			0.132			11.89			3.29			35.17			15.45			0.4			1.15			13.17			0			2.42			0			49.91
213	2015-04-09	570	T. clarkei (encrusted)	F-1	7.22			1.81			0.054			9.97			1.34			17.59			11.24			1.24			0.69			8.01			0			3.6			0			49.45
214	2015-04-09	570	T. clarkei (encrusted)	F-2	6.99			1.74			0.054			8			0.68			104.49			10.61			0.38			2.19			8.47			0.46			3.13			0.033			65.34
215	2015-04-09	570	T. clarkei (encrusted)	F-3	6.38	7.39	1.11	1.74	1.82	0.11	0.083	0.081	0.037	7.54	9.35	2	0.21	1.38	1.35	59.99	54.31	37.7	8.75	11.51	2.83	0.14	0.54	0.48	1.88	1.48	0.68	5.13	8.7	3.33	0	0.12	0.23	3.1	3.06	0.49	0	0.008	0.016	47.28	52.99	8.31
216	2015-04-09	120	G. ruber	F0	X			2.04			X			X			X			271.74			X			2.01			X			X			1.53			X			0.383			558.36
217	2015-04-09	120	G. ruber	F-1	4.96			1.69			0.228			15.54			0.83			74.31			15.72			0.38			6.83			17.03			0			13.43			0.163			66
218	2015-04-09	120	G. ruber	F-2	15.24	10.1	7.27	1.82	1.85	0.18	0.286	0.257	0.041	64.14	39.84	34.37	0.81	0.82	0.01	19.52	121.85	132.66	10.11	12.91	3.97	0.35	0.91	0.95	7.75	7.29	0.65	28.28	22.66	7.95	0.46	0.66	0.79	17.34	15.39	2.76	0.53	0.359	0.185	270.42	298.26	247.36
219	2015-04-09	220	G. ruber	F0	10.62			1.58			0.2			24.83			0.25			53.72			7.12			0.09			3.03			3.04			0			3.72			0.327			99.26
220	2015-04-09	220	G. ruber	F-1	4.65			1.5			0.311			15.08			0.48			86.18			41.75			0.13			7.58			9.35			0			2.07			0			0
221	2015-04-09	220	G. ruber	F-2	6.18	7.15	3.1	1.58	1.55	0.05	0.212	0.241	0.061	11.31	17.07	6.97	0.1	0.28	0.19	34.76	58.22	26.01	21.33	23.4	17.41	0.15	0.12	0.03	7.64	6.08	2.64	3.39	5.26	3.54	0	0	0	1.67	2.49	1.09	0	0.109	0.189	232.36	110.54	116.59
222	2015-04-09	450	G. ruber	F0	8.3			1.72			0.28			19.74			1.86			69.66			24.78			0.43			2.68			7.06			0.44			5.98			0			74.51
223	2015-04-09	450	G. ruber	F-1	9.4			1.75			0.172			14.11			0.6			112.8			23.09			0.39			2.52			3.49			0.61			3.09			0.03			287.83
224	2015-04-09	450	G. ruber	F-2	5.98	7.89	1.74	1.61	1.69	0.07	0.186	0.213	0.059	9.83	14.56	4.97	0.36	0.94	0.81	314.88	165.78	130.91	9.04	18.97	8.64	0.28	0.37	0.08	0.97	2.06	0.95	4.14	4.9	1.9	0.36	0.47	0.13	1.95	3.67	2.08	0.031	0.02	0.017	111.63	157.99	113.97
225	2015-04-09	570	G. ruber	F0	5.35			1.72			0.125			10.2			0.52			22.4			4.56			0.32			0.6			1.74			0			0.36			0.026			30.93
226	2015-04-09	570	G. ruber	F-1	6.04	5.7	0.49	1.63	1.67	0.07	0.236	0.18	0.079	10.89	10.54	0.49	0.71	0.61	0.14	56.9	39.65	24.39	11.58	8.07	4.96	0.24	0.28	0.06	3.35	1.97	1.95	1.56	1.65	0.13	0.58	0.29	0.41	0.48	0.42	0.08	0.043	0.034	0.012	62.76	46.84	22.51
227	2015-05-14	120	T. clarkei (big)	F0	7.51			1.72			0.057			9.49			0.33			3.23			7.2			0.09			0.9			9.49			0			2.71			0.026			62.93
228	2015-05-14	120	T. clarkei (big)	F-1	5.14			1.81			0.081			9.89			0.09			28.94			6.69			0.12			2.1			6.1			0			0.99			0.042			168.11
229	2015-05-14	120	T. clarkei (big)	F-2	5.96			1.84			0.088			10.6			0.07			32.87			11.44			0.08			1.3			18.32			0			2.04			0.049			168.76
230	2015-05-14	120	T. clarkei (big)	F-3	5.04			1.94			0.061			11.65			0.02			38.35			11.93			0.08			2.88			8.53			0			0.9			0			280.97
231	2015-05-14	120	T. clarkei (big)	F-4	5.76	5.88	0.99	1.69	1.8	0.1	0.087	0.075	0.015	13.42	11.01	1.58	0.1	0.12	0.12	13.63	23.4	14.54	6.14	8.68	2.77	0.13	0.1	0.02	3.94	2.22	1.22	11.73	10.83	4.65	0	0	0	2.69	1.86	0.88	0	0.023	0.023	123.11	160.78	79.93
232	2015-05-14	220	T. clarkei (big)	F0	48.33			1.51			0.167			185.12			4.49			201.44			19.67			0			7.56			28.51			3.8			3.13			0.316			256.74
233	2015-05-14	220	T. clarkei (big)	F-2	9.15			1.97			0.15			25.73			0.09			13.72			12.99			0.06			1.05			11.48			0			1.47			0			61.54
234	2015-05-14	220	T. clarkei (big)	F-3	18.32	25.27	20.49	1.89	1.79	0.25	0.106	0.141	0.031	54.04	88.3	85.04	0.19	1.59	2.51	11.25	75.47	109.1	21.22	17.96	4.37	0.15	0.1	0.07	1.09	3.23	3.75	29.06	23.02	10	0.78	1.53	2.01	2.02	2.21	0.84	0.096	0.138	0.162	137.23	151.84	98.42
235	2015-05-14	340	T. clarkei (big)	F0	20.06			2.16			0.16			80.88			2.7			19			17.61			0.15			1.46			46.85			0.61			2.98			0.108			186.18
236	2015-05-14	340	T. clarkei (big)	F-1	26.55			1.63			0.266			113.73			1.23			25.06			2.28			0.11			16.39			25.7			3.68			2.1			0.267			224.55
237	2015-05-14	340	T. clarkei (big)	F-2	8.86			1.65			0.062			17.54			0.05			19.05			8.57			0.05			0.67			40.17			0.22			1.87			0			19
238	2015-05-14	340	T. clarkei (big)	F-3	6.34			1.64			0.113			14.13			0.11			16.43			7.8			0.07			3.52			2.94			0			1.27			0.059			186.87
239	2015-05-14	340	T. clarkei (big)	F-4	7	13.76	9.06	1.6	1.73	0.24	0.077	0.136	0.082	16.73	48.6	45.97	0.51	0.92	1.1	12.58	18.42	4.55	14.4	10.13	6	0.12	0.1	0.04	0.78	4.57	6.71	5.71	24.27	19.78	0	0.9	1.57	1.2	1.88	0.72	0	0.087	0.11	88.16	140.95	84.86
240	2015-05-14	450	T. clarkei (big)	F0	48.77			1.56			0.394			131.33			X			X			X			X			5.11			62.8			1.52			12.02			0.45			237.4
241	2015-05-14	450	T. clarkei (big)	F-1	20.21			1.71			0.292			71.08			1.36			61.7			12.67			0.26			1.82			13.7			3.14			1.47			0.124			314.38
242	2015-05-14	450	T. clarkei (big)	F-2	5.69			1.83			0.101			13.14			1.2			59.79			17.41			0.26			0			6.24			0.49			1.58			0			62.71
243	2015-05-14	450	T. clarkei (big)	F-3	7.71			2			0.103			9.99			0.39			4.44			28.41			0.16			1.18			4.43			0			2.99			0.03			56.25
244	2015-05-14	450	T. clarkei (big)	F-4	5.71	17.62	18.43	1.75	1.77	0.16	0.106	0.199	0.136	10.39	47.19	53.73	0.09	0.76	0.62	14.39	35.08	29.92	17.45	18.99	6.67	0.09	0.19	0.08	1.33	1.89	1.92	3.38	18.11	25.31	0.38	1.11	1.27	1.43	3.9	4.59	0	0.121	0.191	17.83	137.71	130.17
245	2015-05-14	570	T. clarkei (big)	F0	4.59			1.4			0.075			10.77			2.84			25.34			28.61			0.95			2.19			8.08			0.78			0.95			0.19			211.94
246	2015-05-14	570	T. clarkei (big)	F-1	34.48			1.51			0.252			128.51			3.76			126.75			13.46			1.46			7.63			32.46			4.06			1.55			0.074			0
247	2015-05-14	570	T. clarkei (big)	F-2	5.59			1.65			0.067			17.02			0.11			9.92			16.85			0.15			0			5.35			0.68			1.2			0			0
248	2015-05-14	570	T. clarkei (big)	F-3	5.82	12.62	14.58	1.83	1.6	0.18	0.124	0.13	0.085	10.94	41.81	57.87	0.09	1.7	1.89	15.36	44.34	55.3	6.62	16.39	9.19	0.84	0.85	0.54	0.66	2.62	3.46	2.84	12.18	13.69	0	1.38	1.82	0.87	1.14	0.31	0	0.066	0.09	64.22	69.04	99.96
249	2015-05-14	120	T. clarkei (encrusted)	F0	27.92			2			0.472			87.58			1.33			17.07			X			0.68			3.4			55.79			0.79			16.36			0.052			X
250	2015-05-14	120	T. clarkei (encrusted)	F-1	5.07			1.81			0.084			11.52			0			9.54			2.85			0.08			2.01			3.27			0			1.54			0.121			55.95
251	2015-05-14	120	T. clarkei (encrusted)	F-2	6.11			1.77			0.112			12.15			0.1			11.76			6.2			0.22			0.78			15.62			0.4			4.03			0.057			160.6
252	2015-05-14	120	T. clarkei (encrusted)	F-3	10.13	12.31	10.64	1.8	1.85	0.11	0.082	0.187	0.19	17.83	32.27	36.98	0.27	0.57	0.67	22.61	15.24	5.84	10.18	6.41	3.67	0.12	0.28	0.27	1.34	1.88	1.13	11.84	21.63	23.35	0.22	0.35	0.34	2.94	6.22	6.84	0	0.057	0.049	133.55	116.7	54.32
253	2015-05-14	220	T. clarkei (encrusted)	F0	10.02			1.8			0.076			12.31			0.22			69.45			4.99			0.07			0.94			7.54			0			2.03			0.02			40.95
254	2015-05-14	220	T. clarkei (encrusted)	F-1	8.23			1.86			0.077			7.31			0.12			12.52			8.22			0.05			1.13			20.05			0			3.96			0.018			66.39
255	2015-05-14	220	T. clarkei (encrusted)	F-2	7.78	8.68	1.18	1.9	1.86	0.05	0.039	0.064	0.022	8.18	9.27	2.67	0.3	0.21	0.09	8.27	30.08	34.16	6.23	6.48	1.62	0.13	0.08	0.04	1.21	1.09	0.14	13.67	13.75	6.26	2.36	0.79	1.36	5.42	3.8	1.7	0.14	0.06	0.07	49.79	52.38	12.91
256	2015-05-14	340	T. clarkei (encrusted)	F0	9.35			1.62			0.118			23.7			0.35			1.39			7.89			0.27			1.83			7.85			0.71			1.45			0.029			51.66
257	2015-05-14	340	T. clarkei (encrusted)	F-1	13.23			2.13			0.159			32.97			0.09			19.85			10.83			0.06			0.96			9.65			0			2.04			0.057			50.77
258	2015-05-14	340	T. clarkei (encrusted)	F-2	9.58			1.76			0.082			16.73			0.33			32.85			14.67			0.14			1.79			5.88			0.33			2.79			0.122			30.85
259	2015-05-14	340	T. clarkei (encrusted)	F-3	13.31			2.27			0.111			20.45			0.93			47.79			17.94			0.89			8.84			22.94			2.28			10.08			0			316.25
260	2015-05-14	340	T. clarkei (encrusted)	F-4	11.23	11.34	1.91	1.85	1.93	0.27	0.062	0.106	0.037	29.38	24.65	6.57	0.45	0.43	0.31	2.06	20.79	20.02	10.73	12.41	3.92	0.08	0.29	0.35	2.85	3.26	3.2	7.69	10.8	6.92	0	0.66	0.95	2.15	3.7	3.6	0	0.042	0.051	27.82	95.47	123.91
261	2015-05-14	570	T. clarkei (encrusted)	F0	24			1.48			0.188			74.63			1.96			114.15			30.31			1.27			4.83			17.79			1.65			0.98			0.147			255.75
262	2015-05-14	570	T. clarkei (encrusted)	F-1	5.99			1.75			0.058			8.68			0.15			9.52			12			0.11			3.52			5.25			0.45			1.01			0			50.28
263	2015-05-14	570	T. clarkei (encrusted)	F-2	6.17			1.77			0.107			9.25			0			13.76			5.15			0.04			0.79			3.77			0.23			0.4			0.034			28.82
264	2015-05-14	570	T. clarkei (encrusted)	F-3	6.38			1.69			0.044			7.73			0.21			12.98			7.68			0.13			1.06			3.99			0			0.9			0.067			55.71
265	2015-05-14	570	T. clarkei (encrusted)	F-4	5.72	9.65	8.02	1.72	1.68	0.12	0.113	0.102	0.056	17.74	23.6	28.81	0.39	0.68	0.86	14.1	32.9	45.45	10.14	13.06	9.98	0.22	0.35	0.52	3.61	2.76	1.76	5.34	7.23	5.94	0.37	0.54	0.64	6.75	2.01	2.66	0	0.05	0.061	147.92	107.7	94.55
266	2015-05-14	120	G. ruber	F0	10.83			1.84			0.125			15.88			X			153.54			14.82			2.62			2.7			7.6			0.63			1.54			0.169			213.46
267	2015-05-14	120	G. ruber	F-1	10.2			1.78			0.236			11.41			0.21			107			14.58			0.32			8.35			9.38			0			0.93			0			46.25
268	2015-05-14	120	G. ruber	F-2	11.74	10.92	0.77	1.78	1.8	0.03	0.295	0.219	0.086	13.45	13.58	2.24	0.43	0.32	0.15	271.22	177.25	84.64	28.42	19.27	7.92	0.69	1.21	1.23	6.95	6	2.94	8.81	8.6	0.91	0	0.21	0.36	2.13	1.53	0.6	0.385	0.185	0.193	63.78	107.83	91.9
269	2015-05-14	220	G. ruber	F0	3.86			1.65			0.13			11.8			0.2			17.4			8.33			0.06			2.41			3.61			0			0.82			0.029			223.44
270	2015-05-14	220	G. ruber	F-1	5.39			1.71			0.147			11.45			0.13			46.11			6.59			0.07			2.09			2.76			3.04			0.61			0			108.51
271	2015-05-14	220	G. ruber	F-2	5.43	4.89	0.89	1.51	1.62	0.1	0.137	0.138	0.008	11.45	11.57	0.2	0.16	0.17	0.04	45.26	36.26	16.33	6.95	7.29	0.92	0.24	0.13	0.1	3.43	2.64	0.7	2.45	2.94	0.6	0.23	1.09	1.69	0.62	0.68	0.12	0	0.01	0.017	76.67	136.21	77.21
272	2015-05-14	340	G. ruber	F0	6.15			1.62			0.117			15.19			0.19			40.83			7.17			0.24			2.41			3.31			0.26			1.56			0			234.95
273	2015-05-14	340	G. ruber	F-1	4.03			1.69			0.15			11.57			0.11			17.74			7.28			0.14			2.05			3.54			0.52			0.74			0.036			52.17
274	2015-05-14	340	G. ruber	F-2	6.81	5.66	1.45	1.7	1.67	0.05	0.132	0.133	0.017	20.65	15.8	4.57	1	0.43	0.49	13.9	24.16	14.57	19.17	11.2	6.9	0.37	0.25	0.12	1.97	2.14	0.24	7.1	4.65	2.13	0.78	0.52	0.26	1.95	1.42	0.61	0.059	0.032	0.03	82.59	123.24	97.93
275	2015-05-14	450	G. ruber	F0	5.61			1.52			0.118			11.47			0.28			43.83			6.33			0.11			3.31			2.84			3.8			2.71			0.159			127.15
276	2015-05-14	450	G. ruber	F-1	4.75			1.66			0.193			14.48			1.21			27.41			24.94			0.42			1.96			2.9			1.01			3.4			0.058			55.48
277	2015-05-14	450	G. ruber	F-2	4.49	4.95	0.58	1.77	1.65	0.12	0.136	0.149	0.039	12.71	12.89	1.52	0.11	0.53	0.59	18.17	29.8	13	9.8	13.69	9.9	0.11	0.21	0.18	2.7	2.66	0.67	2.86	2.86	0.03	0.3	1.7	1.85	1.44	2.52	0.99	0	0.072	0.08	0	60.88	63.75
278	2015-05-14	570	G. ruber	F0	3.47			1.67			0.121			9.79			0.11			24.26			7.36			0.09			2.6			1.97			0			1.16			0			0
279	2015-05-14	570	G. ruber	F-1	4.52			1.64			0.136			11.21			0.18			8.44			4.98			0.12			0.79			2.07			0.6			1.02			0			41.25
280	2015-05-14	570	G. ruber	F-2	4.57	4.19	0.62	1.65	1.65	0.02	0.126	0.127	0.008	10.68	10.56	0.72	0.2	0.16	0.05	12.55	15.08	8.21	4.72	5.68	1.46	0.16	0.12	0.03	1.57	1.65	0.91	2.11	2.05	0.07	0.78	0.46	0.41	0.6	0.93	0.29	0.036	0.012	0.021	43.51	28.25	24.49
281	2014-06-22	120	G. ruber	F0	4.29			1.43			0.076			6.6			0.02			1.21			7.05			0.06			0.63			1.31			0.16			82.09			0			25.15
282	2014-06-22	120	G. ruber	F-1	6.68			1.4			0.162			9.71			0.17			2.39			13.57			0.07			1.19			3.15			0.26			95.34			0			29.19
283	2014-06-22	120	G. ruber	F-2	6.65	5.87	1.37	1.41	1.41	0.02	0.105	0.114	0.044	7.82	8.04	1.56	0.06	0.08	0.08	9.36	4.32	4.41	18.7	13.11	5.84	0.09	0.07	0.01	3.64	1.82	1.6	3.93	2.8	1.35	0	0.14	0.13	86.07	87.83	6.8	0	0	0	19.61	24.65	4.81
284	2014-06-22	220	G. ruber	F0	7.04			1.41			0.259			12.17			0.01			1.99			9.59			0.08			1			2.96			0			19.03			0			21.96
285	2014-06-22	220	G. ruber	F-1	10.4			1.56			0.249			15.89			0.04			5.59			17.46			0.09			2.57			6.43			0.2			26.09			0.026			30.95
286	2014-06-22	220	G. ruber	F-2	9.49	8.98	1.74	1.51	1.49	0.07	0.247	0.251	0.006	14.22	14.09	1.86	0.03	0.03	0.01	3.87	3.82	1.8	9.62	12.22	4.53	0.09	0.09	0.01	2.71	2.09	0.95	4.53	4.64	1.74	0	0.07	0.12	21.92	22.35	3.55	0.011	0.012	0.013	26.84	26.58	4.5
287	2014-06-22	340	G. ruber	F0	12.78			1.49			0.235			20.23			1.6			49.24			49.15			4.32			8.55			12.9			0.08			27.25			0.019			89.77
288	2014-06-22	340	G. ruber	F-1	8.59			1.53			0.234			17.75			0.47			7.9			39.03			0.19			4.87			8.04			0			19.88			0			42.59
289	2014-06-22	340	G. ruber	F-2	8.79	10.05	2.36	1.62	1.55	0.07	0.192	0.22	0.024	12.61	16.86	3.89	0.14	0.74	0.77	5.86	21	24.48	41.74	43.31	5.24	0.12	1.54	2.4	1.62	5.01	3.47	6.8	9.24	3.23	0.11	0.06	0.06	19.62	22.25	4.33	0.018	0.012	0.011	34.44	55.6	29.87
290	2014-06-22	450	T. clarkei (big)	F0	9.87			1.39			0.104			10.11			0.25			2.16			3.14			0.04			4.11			0.96			0			12.95			0			0
291	2014-06-22	450	T. clarkei (big)	F-1	8.44			1.96			0.265			10.48			0.27			13.75			15.5			0.29			5.58			5.21			0			21.97			0			39.13
292	2014-06-22	450	T. clarkei (big)	F-2	6.97			1.36			0.216			7.06			0.09			12.88			11.43			0.08			1.52			0.53			0.27			5.49			0.056			45.57
293	2014-06-22	450	T. clarkei (big)	F-3	8.82			1.27			0.533			11.35			0.06			24.77			13.19			0.07			0.83			3.09			0			44.43			0			29.95
294	2014-06-22	450	T. clarkei (big)	F-4	7.76	8.37	1.09	1.42	1.48	0.28	0.177	0.259	0.164	7.82	9.37	1.83	0.21	0.18	0.1	3.14	11.34	9.22	7.6	10.17	4.87	0.09	0.11	0.1	2.98	3	1.92	2.47	2.45	1.87	0	0.05	0.12	6.64	18.3	16.01	0	0.011	0.025	13.89	25.71	18.66
295	2014-06-22	450	T. clarkei (encrusted)	F0	X			1.66			X			X			X			X			X			X			X			39.51			6.22			65.25			2.049			X
296	2014-06-22	450	T. clarkei (encrusted)	F-2	14.36			1.5			0.365			20.76			9.48			134.01			84.06			3.17			11.72			10.01			0.32			21.38			0.164			179.79
297	2014-06-22	450	T. clarkei (encrusted)	F-3	12.41			1.5			0.294			21.25			6.61			142.74			39.89			4.12			2.94			7.9			3.97			25.87			0.599			187.88
298	2014-06-22	450	T. clarkei (encrusted)	F-4	13.95	13.57	1.03	1.53	1.52	0.09	0.328	0.329	0.035	21.08	21.03	0.25	15.27	10.46	4.41	410.47	229.07	157.15	63.03	62.33	22.09	5.58	4.29	1.21	3.9	6.19	4.81	14.72	14.92	14.43	0.27	2.16	2.8	26.34	29.1	21.73	0.672	0.697	0.807	498.28	288.65	181.59
299	2014-06-22	450	G. ruber	F0	7.3			1.39			0.097			8.66			2.97			133.12			16.48			1.1			1.36			2.09			0.52			4.77			0.172			83.14
300	2014-06-22	450	G. ruber	F-1	11.91			1.37			0.097			15.26			1.28			15.46			26.42			0.37			1			3.08			0.16			14.14			0.055			34.11
301	2014-06-22	450	G. ruber	F-2	7.89	9.03	2.51	1.36	1.37	0.01	0.109	0.101	0.007	9.22	11.05	3.66	0.11	1.46	1.44	5.86	51.48	70.86	44.64	29.18	14.28	0.14	0.54	0.5	1.54	1.3	0.27	2.1	2.42	0.57	0.29	0.32	0.18	3.45	7.45	5.83	0	0.076	0.088	24.32	47.19	31.52
302	2015-06-18	220	T. clarkei (big)	F0	4			1.52			0.058			7.37			0.12			5.64			6.79			0.12			0			5.08			0			3.93			0.06			141.24
303	2015-06-18	220	T. clarkei (big)	F-1	5.02			1.56			0.044			8.39			0.07			17.48			3.17			0.05			2.7			4.32			0.62			1.39			0			139.16
304	2015-06-18	220	T. clarkei (big)	F-2	4.04			1.57			0.028			7.13			0.02			0.91			3.38			0.04			0.76			1.94			0			1.46			0.042			30.93
305	2015-06-18	220	T. clarkei (big)	F-3	4.14	4.3	0.49	1.58	1.56	0.03	0.058	0.047	0.014	6.74	7.41	0.7	0.05	0.06	0.04	0	6.01	8.04	5.2	4.64	1.7	0.05	0.06	0.04	1.66	1.28	1.17	1.94	3.32	1.62	0.25	0.22	0.29	1.37	2.04	1.26	0.014	0.029	0.027	29.85	85.3	63.41
306	2015-06-18	340	T. clarkei (big)	F0	6.13			1.48			0.057			8.62			0.17			1.47			8.83			0.12			1.47			2.63			0			0.12			0			0
307	2015-06-18	340	T. clarkei (big)	F-1	4.64			1.52			0.105			9.52			1.16			39.05			11			0.03			1.9			1.94			0			0.43			0			76.53
308	2015-06-18	340	T. clarkei (big)	F-2	5.1			1.48			0.072			7.94			0.07			0			0			0.02			1.1			0.39			0			0.05			0			24.57
309	2015-06-18	340	T. clarkei (big)	F-3	5.6			1.55			0.052			9.43			0.05			12.62			13.17			0			0.9			2.07			0			1.17			0			41.69
310	2015-06-18	340	T. clarkei (big)	F-4	11.22	6.54	2.67	1.8	1.57	0.13	0.113	0.08	0.028	27.09	12.52	8.17	0.45	0.38	0.47	30.11	16.65	17.37	7.65	8.13	5.01	0.15	0.06	0.07	1.22	1.32	0.39	8.62	3.13	3.18	0	0	0	0.89	0.53	0.49	0.117	0.023	0.052	63.85	41.33	30.56
311	2015-06-18	450	T. clarkei (big)	F0	6.29			1.56			0.088			7.14			0.86			22.5			3.91			0.13			1.81			1.68			0			0.93			0.026			26.48
312	2015-06-18	450	T. clarkei (big)	F-1	6.63			1.53			0.126			7.78			0.1			0			1.57			0.01			0.6			1.3			0.15			0.32			0			13.61
313	2015-06-18	450	T. clarkei (big)	F-2	13.61			2.02			0.152			24.64			0.77			74.53			19.26			0.93			3.13			11.73			0			12.69			0.101			77.45
314	2015-06-18	450	T. clarkei (big)	F-3	16.76			1.77			0.209			12.33			0.16			3.53			32.07			0.08			2.56			9.21			0			5.47			0			88.86
315	2015-06-18	450	T. clarkei (big)	F-4	9.81	10.62	4.52	1.67	1.71	0.2	0.153	0.146	0.044	12.35	12.85	7.03	0.09	0.39	0.39	5.14	21.14	31.08	6.43	12.65	12.83	0.11	0.25	0.38	1.99	2.02	0.95	3.31	5.45	4.73	0	0.03	0.07	2.04	4.29	5.1	0	0.025	0.044	28.53	46.99	33.75
316	2015-06-18	570	T. clarkei (big)	F0	5.46			1.58			0.064			8.67			1.54			6.72			16.06			0.2			0.24			15.22			0			1.38			0.031			67.76
317	2015-06-18	570	T. clarkei (big)	F-1	6.36			1.66			0.089			10.01			0.19			29.16			5.28			0.05			1.35			11.38			0			0.72			0			0
318	2015-06-18	570	T. clarkei (big)	F-2	5.41			1.55			0.039			7.64			0.2			1.23			3.33			0.11			0			6.97			0			0.46			0			17.39
319	2015-06-18	570	T. clarkei (big)	F-3	5.92	5.79	0.45	1.52	1.58	0.06	0.067	0.065	0.02	9.36	8.92	1.02	0.07	0.5	0.7	3.6	10.18	12.85	3.64	7.07	6.05	0.05	0.11	0.07	0.59	0.54	0.59	11.29	11.22	3.37	0	0	0	0.38	0.73	0.45	0	0.008	0.015	0	21.29	32.05
320	2015-06-18	220	T. clarkei (encrusted)	F0	9.55			1.84			0.046			7.55			0.21			18.41			11.51			0.07			0.85			5.84			0			3.59			0			80.34
321	2015-06-18	220	T. clarkei (encrusted)	F-1	7.7			1.48			0.103			8.3			0.42			19.06			4.96			0.08			1.13			2.96			0.36			4.66			0			86.81
322	2015-06-18	220	T. clarkei (encrusted)	F-2	6.93			1.51			0.243			8.46			0.01			47.66			0			0.03			0.98			4.09			0.71			1.28			0.031			37.1
323	2015-06-18	220	T. clarkei (encrusted)	F-3	18.32	10.62	5.25	1.53	1.59	0.17	0.102	0.123	0.084	49.86	18.54	20.88	1.33	0.49	0.58	57.36	35.62	19.9	0	4.12	5.45	0.07	0.06	0.02	0	0.74	0.51	10.43	5.83	3.29	1.14	0.55	0.49	1.78	2.82	1.58	0.054	0.021	0.026	76.49	70.19	22.46
324	2015-06-18	340	T. clarkei (encrusted)	F0	7.99			1.68			0.075			10.62			0.23			17.84			9.77			0.09			1.4			9.02			0.4			0.76			0.034			37.23
325	2015-06-18	340	T. clarkei (encrusted)	F-1	8.02			1.67			0.112			9.1			0.19			22.07			13.76			0.03			0.21			3.45			0			0.39			0			20.38
326	2015-06-18	340	T. clarkei (encrusted)	F-2	6.19			2.03			0.092			10.09			0.11			22.01			10.04			0.1			2.52			1.28			0			0.54			0			39.17
327	2015-06-18	340	T. clarkei (encrusted)	F-3	8.58	7.7	1.04	1.52	1.72	0.21	0.048	0.082	0.027	10.62	10.11	0.72	0.25	0.19	0.06	1.76	15.92	9.64	35.03	17.15	12.06	0.36	0.14	0.14	3.66	1.95	1.48	3.36	4.28	3.32	0	0.1	0.2	1.95	0.91	0.71	0	0.008	0.017	51.11	36.97	12.65
328	2015-06-18	450	T. clarkei (encrusted)	F0	7.03			1.37			0.089			11.7			0.09			11.98			5.35			0.07			1.37			3.28			0			1.37			0			0
329	2015-06-18	450	T. clarkei (encrusted)	F-1	5.58			1.42			0.134			20.69			0.09			8.03			5.91			0.03			1.54			4.95			0			1.52			0			0
330	2015-06-18	450	T. clarkei (encrusted)	F-2	4.39			1.54			0.02			6.13			0.08			10.04			7.84			0.06			0.9			7.25			0.35			3.38			0			21.38
331	2015-06-18	450	T. clarkei (encrusted)	F-3	29.79	11.7	12.11	1.88	1.55	0.23	0.287	0.132	0.113	42.39	20.23	15.94	0	0.08	0.01	24.71	13.69	7.52	16.3	8.85	5.08	0.12	0.07	0.04	1.98	1.45	0.45	43.77	14.81	19.37	0.75	0.28	0.36	5.75	3	2.05	0	0	0	78.68	25.02	37.17
332	2015-06-18	570	T. clarkei (encrusted)	F0	5.51			1.49			0.04			10.23			0.05			9.52			2.29			0			3.11			2.86			0			0.66			0			0
333	2015-06-18	570	T. clarkei (encrusted)	F-1	18.78			2.92			0.165			37.46			1.01			54.59			74.09			1.67			6.7			37.86			3.69			6.41			0			161.13
334	2015-06-18	570	T. clarkei (encrusted)	F-2	28.63			1.81			0.207			80.25			X			69.92			82.21			1.22			13.71			47.26			0			4.8			0.098			74.55
335	2015-06-18	570	T. clarkei (encrusted)	F-3	18.74	17.91	9.49	1.97	2.05	0.61	0.106	0.129	0.072	35.93	40.97	29.01	0.19	0.42	0.52	47.62	45.41	25.68	43.4	50.5	36.23	0.08	0.74	0.83	2.16	6.42	5.24	27.13	28.78	19.13	0	0.92	1.84	3.73	3.9	2.43	0	0.024	0.049	90.73	81.6	66.12
336	2015-06-18	120	G. ruber	F0	4.56			1.44			0.07			6.64			0.05			24.96			5.23			0.05			0.91			1.67			0.52			0.2			0			40.41
337	2015-06-18	120	G. ruber	F-1	6.44			1.49			0.135			7.74			0.16			24.15			7.26			0.09			1.92			2.55			0.23			0.66			0			58.14
338	2015-06-18	120	G. ruber	F-2	6.77	5.92	1.19	1.47	1.47	0.03	0.119	0.108	0.034	7.05	7.14	0.55	0.07	0.09	0.06	25.24	24.78	0.57	5.53	6.01	1.1	0.08	0.07	0.02	0.6	1.14	0.69	3.86	2.7	1.1	0.31	0.35	0.15	0.64	0.5	0.26	0.041	0.014	0.023	69.92	56.16	14.86
339	2015-06-18	220	G. ruber	F0	2.01			1.49			0.139			8.34			0.14			20.17			7.11			0.06			2.58			1.91			0			1.33			0			72.52
340	2015-06-18	220	G. ruber	F-1	X			1.67			0.168			16.33			0.17			18.25			11.67			0.19			4.19			36.81			0.61			8.2			0			198.45
341	2015-06-18	220	G. ruber	F-2	5.69	3.85	2.6	1.54	1.57	0.09	0.142	0.15	0.016	9.07	11.25	4.42	0.09	0.13	0.04	31.42	23.28	7.12	5.66	8.15	3.13	0.09	0.11	0.07	1.96	2.91	1.15	5.75	14.82	19.14	0.43	0.34	0.31	3.22	4.25	3.55	0	0	0	57.62	109.53	77.37
342	2015-06-18	340	G. ruber	F0	4.26			1.44			0.192			11.94			2.2			42.6			14.6			0.2			0.88			4.33			0			0.54			0.022			139
343	2015-06-18	340	G. ruber	F-1	5.25			1.48			0.348			8.7			0.24			36.24			20.74			0.21			5.15			8.62			0			1.06			0			342.97
344	2015-06-18	340	G. ruber	F-2	5.57	5.03	0.68	1.46	1.46	0.02	0.275	0.272	0.078	11.27	10.64	1.71	0.69	1.04	1.03	29.88	36.24	6.36	24.42	19.92	4.96	0.04	0.15	0.09	5.55	3.86	2.59	5.4	6.12	2.23	0	0	0	1.47	1.02	0.46	0	0.007	0.013	23.87	168.61	161.6
345	2015-06-18	450	G. ruber	F0	3.49			1.54			0.103			9.39			0.24			6.63			6.73			0.06			0.99			3.66			0.36			1.06			0.118			39.61
346	2015-06-18	450	G. ruber	F-1	5.98			1.52			0.131			10.93			0.24			13.5			11.46			0.1			3.42			3.24			0			1.4			0			45.11
347	2015-06-18	450	G. ruber	F-2	7.52	5.66	2.04	1.54	1.53	0.01	0.118	0.117	0.014	13.05	11.12	1.84	0.31	0.26	0.04	29.41	16.51	11.69	11.65	9.94	2.79	0.12	0.09	0.03	2.04	2.15	1.22	7.47	4.79	2.33	0	0.12	0.21	1.87	1.44	0.41	0	0.039	0.068	38.8	41.17	3.43
348	2015-06-18	570	G. ruber	F0	4.94			1.58			0.112			8.73			0.29			23.26			6.73			0.08			1.84			2.69			0.56			0.91			0.035			86.86
349	2015-06-18	570	G. ruber	F-1	7.47			1.48			0.125			10.43			1.76			29.42			22.3			0.8			1.24			4.08			0.61			1.23			0.085			50.2
350	2015-06-18	570	G. ruber	F-2	6.29	6.23	1.27	1.61	1.56	0.07	0.102	0.113	0.012	9.57	9.57	0.85	0.41	0.82	0.82	46.18	32.95	11.86	17.6	15.54	7.99	0.14	0.34	0.4	2.62	1.9	0.69	3.34	3.37	0.7	0.19	0.45	0.23	0.62	0.92	0.31	0.071	0.064	0.026	30.6	55.89	28.56
351	2014-07-29	450	T. clarkei (encrusted)	F0	6.17			1.39			0.093			11.83			0.24			11.82			20.09			0.2			10.09			4.45			0			2.94			0.542			33.56
352	2014-07-29	450	T. clarkei (encrusted)	F-1	7.63			1.41			0.089			11.07			0.12			10.24			11.31			0.07			2.39			4.49			0			4.89			0.04			97.27
353	2014-07-29	450	T. clarkei (encrusted)	F-2	9.01			1.5			0.126			17.89			1.22			9.17			15.01			0.57			9.18			5.34			0			1.67			0			77.68
354	2014-07-29	450	T. clarkei (encrusted)	F-3	8.62	7.86	1.27	1.46	1.44	0.05	0.069	0.094	0.023	21.03	15.45	4.81	0.2	0.44	0.52	16.31	11.88	3.14	19.21	16.4	4.06	0.12	0.24	0.22	4.48	6.53	3.7	6.55	5.21	0.99	0.17	0.04	0.08	2.08	2.9	1.43	0.026	0.152	0.26	0	52.13	43.79
355	2014-07-29	120	T. clarkei (big)	F0	7.61			1.51			X			9.8			0.15			1.37			8.47			2.13			9			13.76			0.37			4.37			0.074			36.34
356	2014-07-29	120	T. clarkei (big)	F-1	7.01			1.58			0.178			7.71			0.02			9.49			3.42			0.08			2.89			3.06			0.35			5.41			0			38.5
357	2014-07-29	120	T. clarkei (big)	F-2	7.56			1.64			0.214			7.71			0.08			6.81			12.6			0.11			1.99			2.99			0.36			4.09			0			26.58
358	2014-07-29	120	T. clarkei (big)	F-3	8.41			1.53			0.178			8.12			0.03			2.7			6.45			0.02			6.32			4.09			0			2.64			0.047			66.67
359	2014-07-29	120	T. clarkei (big)	F-4	8.77	7.87	0.7	1.55	1.56	0.05	0.144	0.179	0.029	7.54	8.17	0.93	0.05	0.07	0.05	5.94	5.26	3.26	7.32	7.65	3.34	0.05	0.48	0.92	1.3	4.3	3.26	3.44	5.47	4.65	0.27	0.27	0.16	3.76	4.06	1	0.03	0.03	0.032	0	33.62	24
360	2014-07-29	120	T. clarkei (encrusted)	F0	7.73			1.41			0.064			8.76			0.69			35.57			13.99			0.47			1.89			3.25			0.19			3.79			0.02			24.49
361	2014-07-29	120	T. clarkei (encrusted)	F-1	7.58			1.44			0.075			11.37			0.16			4.8			12.13			0.09			1.92			5.56			0.15			3.19			0			33.8
362	2014-07-29	120	T. clarkei (encrusted)	F-2	5.91			1.65			0.076			9.32			0.6			2.87			2.79			0.1			3.33			2.72			0.76			0.58			0.043			41.26
363	2014-07-29	120	T. clarkei (encrusted)	F-3	8.72	7.48	1.17	1.58	1.52	0.12	0.093	0.077	0.012	17.27	11.68	3.89	0.19	0.41	0.27	0	10.81	16.63	21.63	12.64	7.74	0.16	0.21	0.18	0	1.79	1.37	8.73	5.07	2.74	0.26	0.34	0.29	7.27	3.71	2.76	0.012	0.019	0.018	46.95	36.63	9.72
364	2014-07-29	120	G. ruber	F0	10.26			1.64			0.082			8.8			0.97			X			7.23			0.43			2.18			4.12			0.15			2.22			0.018			34.18
365	2014-07-29	120	G. ruber	F-1	12.47			1.48			0.148			9.53			0.08			15.08			9.65			0.13			0			8.01			0			2.47			0			28.7
366	2014-07-29	120	G. ruber	F-2	16.31	13.02	3.06	1.52	1.55	0.08	0.195	0.142	0.057	15.7	11.34	3.79	0.21	0.42	0.48	7.26	11.17	5.53	8.68	8.52	1.22	0.17	0.24	0.16	1.48	1.22	1.11	12.27	8.13	4.08	0.26	0.14	0.13	5.49	3.39	1.82	0.039	0.019	0.02	54.33	39.07	13.5
367	2014-07-29	220	G. ruber	F0	11.19			1.6			0.171			17.03			0.04			7.17			3.91			0.09			4.34			2.96			0.16			291.01			0.013			71.76
368	2014-07-29	220	G. ruber	F-1	18.49			1.72			0.178			25.84			0.05			7.6			12.05			0.09			6.63			9.4			0			270.72			0.019			58.99
369	2014-07-29	220	G. ruber	F-2	17.69	15.79	4	1.71	1.68	0.07	0.252	0.2	0.045	26.3	23.06	5.23	0.18	0.09	0.08	2.54	5.77	2.81	12.57	9.51	4.86	0.05	0.07	0.02	4.17	5.05	1.37	3.91	5.42	3.48	0	0.05	0.09	167.75	243.16	66.09	0.017	0.017	0.003	151.3	94.02	50.02
370	2014-07-29	340	T. clarkei (big)	F0	5.16			1.46			0.175			6.87			0.06			6.13			7.92			0.08			3.66			1.01			0			0.19			0			0
371	2014-07-29	340	T. clarkei (big)	F-1	6.19			1.41			0.17			7.41			0.09			12.89			7.95			0.06			8.4			1.72			0.36			0.65			0.016			45.53
372	2014-07-29	340	T. clarkei (big)	F-2	4.98			1.41			0.158			7.03			0.22			8.87			8.09			0.27			4.83			1.93			0.18			0.94			0.037			27.05
373	2014-07-29	340	T. clarkei (big)	F-3	5.06			1.42			0.164			7.91			0.05			6.69			6.61			0.05			0.62			0.73			0			1.33			0			13.4
374	2014-07-29	340	T. clarkei (big)	F-4	4.28	5.13	0.69	1.44	1.43	0.02	0.111	0.156	0.026	6.34	7.11	0.59	0.24	0.13	0.09	8.6	8.64	2.65	8.6	7.83	0.74	0.13	0.12	0.09	3.74	4.25	2.8	1.1	1.3	0.5	0	0.11	0.16	0.86	0.79	0.42	0	0.011	0.016	0	17.2	19.4
375	2014-07-29	340	T. clarkei (encrusted)	F0	7.26			1.51			0.043			7.61			0.22			250.21			10.29			0.05			0.6			13.56			0.22			3.55			0.061			39.56
376	2014-07-29	340	T. clarkei (encrusted)	F-1	9.79			1.51			0.13			11.69			0.22			13.14			28.31			0.11			2.03			30.02			0.11			9.69			0.054			0
377	2014-07-29	340	T. clarkei (encrusted)	F-2	7.26			1.45			0.084			10.8			0.15			1.23			5.19			0.1			3.94			4.69			0.16			2.2			0.038			68.83
378	2014-07-29	340	T. clarkei (encrusted)	F-3	6.77			1.54			0.099			9.6			0.05			7.24			7.82			0.06			4.74			4.19			0			1.35			0.014			46.17
379	2014-07-29	340	T. clarkei (encrusted)	F-4	5.69	7.35	1.51	1.49	1.5	0.03	0.09	0.089	0.031	7.3	9.4	1.93	0.04	0.14	0.09	3.85	55.13	109.14	7.21	11.77	9.43	0.08	0.08	0.03	1.91	2.64	1.67	4.92	11.48	11.07	0	0.1	0.1	1.72	3.7	3.45	0.018	0.037	0.021	0	30.91	30.23
380	2014-07-29	340	G. ruber	F0	7.16			1.51			0.135			7.94			0.28			11.05			1.4			0.14			2.1			1.15			0.14			0.48			0			0
381	2014-07-29	340	G. ruber	F-1	9.67			1.47			0.152			8.85			0.49			25.01			11.46			0.14			6.82			2.39			0.21			1.02			0.023			41.07
382	2014-07-29	340	G. ruber	F-2	12.32	9.72	2.58	1.45	1.48	0.03	0.205	0.164	0.037	8.33	8.37	0.46	2.79	1.18	1.39	19.85	18.64	7.06	33.88	15.58	16.63	1.65	0.64	0.87	2.12	3.68	2.72	1.31	1.62	0.67	0.49	0.28	0.19	1.31	0.94	0.42	0.078	0.034	0.04	40.54	27.2	23.56
383	2014-07-29	450	T. clarkei (big)	F0	9.28			1.58			0.175			9.84			0.25			25.39			2.66			0.21			3.29			1.64			0.28			3.56			0.015			44.54
384	2014-07-29	450	T. clarkei (big)	F-1	9.45			1.54			0.187			9.85			0.01			6.66			2.76			0.07			0.77			1.93			0			2.57			0.009			19.63
385	2014-07-29	450	T. clarkei (big)	F-2	8.76			1.51			0.147			8.72			0.04			5.23			6.31			0.09			0.46			1.01			0			4.04			0.012			0
386	2014-07-29	450	T. clarkei (big)	F-3	8.52			1.52			0.136			8.62			0.19			17.2			3.08			0.14			2.35			1.73			0			5.72			0.012			18.75
387	2014-07-29	450	T. clarkei (big)	F-4	9.98	9.2	0.58	1.54	1.54	0.03	0.143	0.158	0.022	10.69	9.54	0.87	0.14	0.13	0.1	10.48	12.99	8.34	8.7	4.7	2.7	0.07	0.12	0.06	3.58	2.09	1.43	2.51	1.77	0.54	0.47	0.15	0.22	5.23	4.22	1.27	0	0.01	0.006	45.06	25.59	19.21
388	2014-07-29	450	G. ruber	F0	6.95			1.43			0.148			10.2			0.81			99.43			14.54			0.76			0.52			2.21			0.3			2.76			0.032			33.83
389	2014-07-29	450	G. ruber	F-1	12.58			1.61			0.242			9.44			1.77			81.73			11.39			1.49			6.19			1.78			2.42			0.94			0.048			26.8
390	2014-07-29	450	G. ruber	F-2	10.89	10.14	2.89	1.52	1.52	0.09	0.211	0.2	0.048	9.1	9.58	0.56	0.03	0.87	0.87	5.85	62.34	49.72	12.74	12.89	1.58	0.09	0.78	0.7	2.54	3.08	2.87	1.03	1.67	0.6	0	0.9	1.32	1.5	1.73	0.93	0.041	0.04	0.008	39.54	33.39	6.38
391	2014-09-20	120	T. clarkei (big)	F0	5.96			1.44			0.064			7.83			0.18			17.54			2.49			0.08			6.88			2.64			0.61			5.84			0			47.94
392	2014-09-20	120	T. clarkei (big)	F-1	6.66			1.51			0.06			8.03			0.38			17.05			11.5			0.2			3.72			8.17			0.3			5.89			0.015			43.5
393	2014-09-20	120	T. clarkei (big)	F-2	5.88			1.52			0.099			8			0.16			9.24			9.88			0.06			5.33			2.5			0			10.47			0.046			16.17
394	2014-09-20	120	T. clarkei (big)	F-3	6.83			1.51			0.093			9.58			0.88			17.01			17.57			0.26			2.9			4.21			0.41			7.64			0.123			56.54
395	2014-09-20	120	T. clarkei (big)	F-4	6.54	6.37	0.43	1.47	1.49	0.04	0.112	0.085	0.023	11.68	9.02	1.64	1.27	0.57	0.49	28.66	17.9	6.94	15.21	11.33	5.79	0.73	0.27	0.27	10.6	5.88	3.05	7.26	4.95	2.63	0.33	0.33	0.22	16.03	9.17	4.27	0.064	0.05	0.048	84.76	49.78	24.71
396	2014-09-20	120	G. ruber	F0	4.93			1.53			0.126			7.74			0.22			11.65			4.95			0.29			1.31			0.99			0			1.02			0.036			30.08
397	2014-09-20	120	G. ruber	F-1	9.68			1.56			0.135			9.46			0.59			15.2			8.95			0.61			1.76			2.64			0			1.78			0.077			33.04
398	2014-09-20	120	G. ruber	F-2	10.27	8.29	2.93	1.56	1.55	0.02	0.155	0.138	0.015	9.46	8.89	0.99	1.25	0.69	0.52	16.99	14.61	2.71	7.05	6.98	2	0.21	0.37	0.21	3.58	2.21	1.2	2.92	2.18	1.05	0.29	0.1	0.17	1.84	1.55	0.46	0.15	0.088	0.058	27.28	30.14	2.88
399	2014-09-20	220	T. clarkei (big)	F0	9			1.46			0.075			12.09			2.66			57.1			18.55			1.41			1.25			5.71			0.81			9.8			0.028			92.59
400	2014-09-20	220	T. clarkei (big)	F-1	6.22			1.39			0.104			7.93			0.3			12.69			18.25			0.25			3.78			1.33			0.19			3.47			0.029			95.77
401	2014-09-20	220	T. clarkei (big)	F-2	7.4			1.49			0.064			9.09			0.44			7.12			17			0.13			1.05			1.16			0.12			6.66			0.031			18.06
402	2014-09-20	220	T. clarkei (big)	F-3	7.21			1.45			0.083			7.29			0.15			7.3			7.75			0.2			1.72			2.02			0			4.67			0.029			13.23
403	2014-09-20	220	T. clarkei (big)	F-4	8.73	7.71	1.15	1.45	1.45	0.04	0.093	0.084	0.015	14.26	10.13	2.95	0.96	0.9	1.03	21.48	21.14	20.93	15.22	15.35	4.45	0.14	0.43	0.55	0.56	1.67	1.25	11.72	4.39	4.5	0.44	0.31	0.32	7.4	6.4	2.46	0.051	0.034	0.01	49.56	53.84	39.39
404	2014-09-20	220	T. clarkei (encrusted)	F0	X			1.58			0.325			40.35			X			X			X			X			7.69			18.26			0.39			15.93			0.057			193.11
405	2014-09-20	220	T. clarkei (encrusted)	F-1	9.03			1.61			0.1			7.63			0.04			2.63			6.54			0.1			1.21			1.83			0.13			3.62			0.019			22.38
406	2014-09-20	220	T. clarkei (encrusted)	F-2	8.93			1.61			0.087			8.89			0.69			2.15			3.87			0.09			0.84			1.57			0			4.64			0			43.04
407	2014-09-20	220	T. clarkei (encrusted)	F-3	11.38			1.63			0.112			12.58			2.91			103.86			36.25			1.27			3.25			6.01			0.26			7.49			0.043			57.26
408	2014-09-20	220	T. clarkei (encrusted)	F-4	17.02	11.59	3.79	1.75	1.64	0.07	0.113	0.147	0.1	17.48	17.38	13.39	1.85	1.37	1.27	32.93	35.39	47.86	38.27	21.23	18.56	0.72	0.55	0.57	13.15	5.23	5.2	5.78	6.69	6.8	0.36	0.23	0.16	14.66	9.27	5.7	0.04	0.032	0.022	38.01	70.76	69.52
409	2014-09-20	220	G. ruber	F0	12.43			1.45			0.22			25.5			0.61			23			16.64			0.34			4.56			4.92			0			22.22			0			108.89
410	2014-09-20	220	G. ruber	F-1	18.19			1.98			0.319			X			X			63.89			64.27			X			7.54			X			0.24			134.23			0.042			124.03
411	2014-09-20	220	G. ruber	F-2	8.57	13.06	4.84	1.56	1.66	0.28	0.19	0.243	0.067	13.41	19.45	8.55	0.09	0.35	0.36	0.86	29.25	31.98	10.55	30.49	29.42	0.17	1.76	2.6	5.37	5.82	1.54	3.6	4.26	0.94	0.32	0.19	0.17	63.96	73.47	56.6	0	0.014	0.024	46.97	93.3	40.83
412	2014-09-20	340	T. clarkei (big)	F0	6.33			1.46			0.151			9.39			0.08			5.29			17.94			0.03			2.59			3.86			0			2.7			0			19.92
413	2014-09-20	340	T. clarkei (big)	F-1	8.61			1.4			0.09			7.61			0.05			8			13.17			0.08			3.13			1.87			0			1.93			0			75.42
414	2014-09-20	340	T. clarkei (big)	F-2	8.29			1.51			0.115			8.39			0.41			9.18			42.35			0.13			0			2.46			0.18			2.13			0.025			27.85
415	2014-09-20	340	T. clarkei (big)	F-3	5.51			1.41			0.091			7.5			0.01			13.09			0			0.04			6.89			1.72			0.5			0.89			0			31.72
416	2014-09-20	340	T. clarkei (big)	F-4	5.53	6.85	1.5	1.46	1.45	0.04	0.155	0.121	0.031	7	7.98	0.93	2.62	0.64	1.12	42.87	15.69	15.45	5.11	15.71	16.43	0.64	0.18	0.26	0.4	2.6	2.75	1.45	2.27	0.96	0.15	0.17	0.2	1.73	1.88	0.66	0.023	0.01	0.013	25.84	36.15	22.36
417	2014-09-20	340	T. clarkei (encrusted)	F0	6.47			1.51			0.086			5.65			0.02			14.66			8.27			0.09			0.94			1.76			0.13			1.67			0.02			57.1
418	2014-09-20	340	T. clarkei (encrusted)	F-1	8.25			1.65			0.081			10			0.57			6.72			20.09			0.4			2.92			3.8			0.31			3.01			0.035			0
419	2014-09-20	340	T. clarkei (encrusted)	F-2	8.51			1.45			0.117			9.71			0.08			2.69			13.13			0			2.87			2.67			0.73			1.78			0			27.23
420	2014-09-20	340	T. clarkei (encrusted)	F-3	6.94	7.54	0.99	1.44	1.51	0.1	0.061	0.086	0.023	7.07	8.11	2.1	0	0.22	0.3	3.18	6.81	5.53	0	10.37	8.45	0.05	0.14	0.18	0.93	1.91	1.13	2.14	2.59	0.89	0.27	0.36	0.26	1.02	1.87	0.83	0	0.014	0.017	32.84	29.29	23.44
421	2014-09-20	340	G. ruber	F0	6			1.36			0.112			8.16			0.52			18.18			80.71			1.15			2.98			1.8			0.24			2.68			0.033			137.65
422	2014-09-20	340	G. ruber	F-1	6.13			1.44			0.147			8.59			1.72			22.68			52.89			0.36			1.56			4.25			0.27			2.37			0.029			33.77
423	2014-09-20	340	G. ruber	F-2	7.1	6.41	0.6	1.39	1.4	0.04	0.113	0.124	0.02	8.62	8.46	0.26	0.79	1.01	0.63	33.53	24.8	7.89	8.87	47.49	36.22	0.43	0.64	0.44	1.8	2.11	0.76	1.85	2.64	1.4	0.28	0.26	0.02	2.24	2.43	0.23	0.013	0.025	0.011	38.26	69.89	58.72
424	2014-09-20	450	T. clarkei (big)	F0	6.46			1.36			0.145			7.39			0.05			7.99			26.1			0			4.26			3.61			0.3			2.41			0			0
425	2014-09-20	450	T. clarkei (big)	F-1	7.69			1.41			0.138			8.78			0.04			15.41			14.85			0.17			2.86			2.6			0			1.21			0			22.4
426	2014-09-20	450	T. clarkei (big)	F-2	8.65			1.45			0.131			8.28			0.07			5.48			5.49			0.02			0.29			2.77			0			0.98			0			39.68
427	2014-09-20	450	T. clarkei (big)	F-3	9.49			1.53			0.156			17.13			0.26			17.78			0			0.09			2.88			5.74			0.25			2.75			0			32.71
428	2014-09-20	450	T. clarkei (big)	F-4	9.27	8.31	1.25	1.37	1.42	0.07	0.109	0.136	0.018	14.72	11.26	4.37	0.43	0.17	0.17	6.41	10.61	5.6	16.02	12.49	10.1	0.04	0.06	0.07	1.99	2.45	1.46	10.99	5.14	3.5	0.3	0.17	0.16	1.91	1.85	0.76	0.03	0.006	0.014	28.76	24.71	15.17
429	2014-09-20	450	T. clarkei (encrusted)	F0	6.69			1.46			0.166			6.04			2.06			10.68			17.25			0.19			2.01			2.13			0.29			3.07			0.02			9.67
430	2014-09-20	450	T. clarkei (encrusted)	F-1	5.01			1.56			0.105			6.24			0.44			17.79			4.85			0.25			1.76			4.17			0			1.24			0.013			54.93
431	2014-09-20	450	T. clarkei (encrusted)	F-2	7.1			1.5			0.191			6.6			2.14			6.1			10.28			0.38			1.03			16.9			0.23			1.99			0			16.6
432	2014-09-20	450	T. clarkei (encrusted)	F-3	8.98			1.58			0.117			9.93			3.46			X			23.41			1.88			3.55			3.51			1.55			2.43			0.068			43.09
433	2014-09-20	450	T. clarkei (encrusted)	F-4	7.18	6.99	1.42	1.49	1.52	0.05	0.121	0.14	0.037	8.11	7.38	1.64	0.3	1.68	1.32	9.28	10.96	4.94	17.66	14.69	7.2	0.07	0.55	0.75	3.1	2.29	1.02	1.77	5.7	6.34	0	0.42	0.65	1.57	2.06	0.72	0.028	0.026	0.026	0	24.86	23.2
434	2014-09-20	450	G. ruber	F0	12.34			1.56			0.19			12.23			0.01			5.78			16.39			0.09			1			2.58			0.42			1.57			0.012			68.94
435	2014-09-20	450	G. ruber	F-1	16.09			1.59			0.26			12.52			1.84			79.36			22.52			0.89			0			3.27			1.24			3.22			0.043			37.91
436	2014-09-20	450	G. ruber	F-2	10.02	12.82	3.07	1.52	1.56	0.04	0.185	0.212	0.042	13.31	12.69	0.56	1.5	1.12	0.97	16.79	33.98	39.69	13.96	17.62	4.41	0.24	0.41	0.43	1.99	0.99	0.99	2.14	2.66	0.57	0.42	0.69	0.47	1.63	2.14	0.94	0.027	0.027	0.016	40.01	48.95	17.34
437	2014-09-20	570	T. clarkei (big)	F0	7.47			1.57			0.123			6.68			0.75			27.66			12.25			0.41			1.14			2.19			0.1			3.74			0.016			86.36
438	2014-09-20	570	T. clarkei (big)	F-1	6.36			1.49			0.114			6.23			0.27			3.08			23.17			0.15			1.45			1.35			0			4.79			0.01			17.99
439	2014-09-20	570	T. clarkei (big)	F-2	6.59			1.48			0.147			7.41			1.39			12.3			8.34			0.29			1.44			1.36			0.12			4.19			0.021			36.62
440	2014-09-20	570	T. clarkei (big)	F-3	7.22			1.51			0.106			6.46			0.06			0.42			5.73			0.12			1.74			1.05			0			3.47			0			0
441	2014-09-20	570	T. clarkei (big)	F-4	7.16	6.96	0.46	1.5	1.51	0.03	0.15	0.128	0.02	6.68	6.69	0.44	0.22	0.54	0.54	42.25	17.14	17.62	7.5	11.4	7	0.16	0.22	0.12	0.21	1.2	0.59	1.32	1.45	0.43	0.25	0.09	0.1	3.75	3.99	0.52	0	0.009	0.009	42.35	36.67	32.39
442	2014-09-20	570	T. clarkei (encrusted)	F0	8.15			1.58			0.099			7.07			0.8			31.75			29.7			0.37			1.67			4.47			0.24			14.51			0.016			60.73
443	2014-09-20	570	T. clarkei (encrusted)	F-1	5.66			1.54			0.067			5.43			0.21			10.32			4.08			0.31			0.5			0.87			0.11			3.25			0			0
444	2014-09-20	570	T. clarkei (encrusted)	F-2	6.69			1.51			0.062			7.43			1.16			39.95			6.74			0.46			1.65			2.36			0.24			6.2			0.037			41.27
445	2014-09-20	570	T. clarkei (encrusted)	F-3	6.46			1.43			0.038			7.39			0.77			12.85			5.47			0.38			2.57			1.91			0			4.95			0.052			46.31
446	2014-09-20	570	T. clarkei (encrusted)	F-4	6.6	6.71	0.9	1.43	1.5	0.07	0.101	0.073	0.027	5.87	6.64	0.93	0.75	0.74	0.34	87.6	36.49	31.19	14.46	12.09	10.63	0.47	0.4	0.07	15.04	4.29	6.06	0.96	2.11	1.46	0	0.12	0.12	5.67	6.92	4.39	0	0.021	0.023	48.33	39.33	23.12
447	2014-09-20	570	G. ruber	F0	5.01			1.51			0.116			7.41			0.64			4.25			4.48			0.1			1.04			0.74			0			0.79			0			33.67
448	2014-09-20	570	G. ruber	F-1	7.55			1.44			0.134			6.86			0.75			81.67			10.91			0.28			0.44			1.19			0			1.72			0.02			15.7
449	2014-09-20	570	G. ruber	F-2	9.62	7.4	2.31	1.48	1.48	0.04	0.149	0.133	0.016	9.1	7.79	1.17	0.77	0.72	0.07	18.06	34.66	41.29	16.33	10.57	5.93	0.26	0.22	0.1	1.55	1.01	0.55	1.6	1.17	0.43	0.19	0.06	0.11	0.98	1.16	0.49	0.029	0.016	0.015	46.29	31.89	15.37
450	2014-10-19	120	T. clarkei (big)	F0	20.07			1.59			0.104			74.96			2.42			81.38			27.84			2.61			4.63			22.38			0.46			4.24			0.119			57.24
451	2014-10-19	120	T. clarkei (big)	F-1	14.65	17.36	3.83	1.37	1.48	0.16	0.074	0.089	0.021	56.32	65.64	13.18	0.76	1.59	1.17	10.03	45.7	50.45	33.59	30.71	4.06	0.28	1.44	1.65	2.68	3.66	1.38	29.95	26.16	5.36	0.42	0.44	0.03	3.06	3.65	0.84	0.033	0.076	0.061	47.31	52.28	7.03
452	2014-10-19	120	G. ruber	F0	8.1			1.52			0.071			9.08			0.16			6.8			10.74			0.09			1.6			2.92			0			23.57			0.051			38.38
453	2014-10-19	120	G. ruber	F-1	9.23			1.52			0.1			11.02			2.83			52.87			21.92			0.63			2.89			6.59			0.4			40.22			0.05			55.05
454	2014-10-19	120	G. ruber	F-2	8.76	8.7	0.57	1.51	1.52	0.01	0.07	0.081	0.017	10.24	10.12	0.98	0.09	1.03	1.56	4.94	21.54	27.15	15.41	16.02	5.61	0.1	0.28	0.31	2.04	2.18	0.66	5.49	5	1.89	0	0.13	0.23	26.87	30.22	8.81	0.039	0.047	0.006	18.65	37.36	18.22
455	2014-10-19	220	T. clarkei (big)	F-1	4.95			1.41			0.054			8.97			0.22			54.68			14.4			0.11			4.14			3.63			0.09			20.24			0			11.41
456	2014-10-19	220	T. clarkei (big)	F-2	5.54			1.43			0.076			10.39			0.11			0.46			24.09			0.07			5.4			2.8			0.15			10.96			0			33.58
457	2014-10-19	220	T. clarkei (big)	F-3	7.97			1.44			0.076			10.23			3.88			92.7			50.24			0.97			2.47			8.68			0.28			41.63			0.129			67.27
458	2014-10-19	220	T. clarkei (big)	F-4	7.26	6.43	1.42	1.19	1.37	0.12	0.054	0.065	0.012	9.6	9.8	0.65	0.6	1.2	1.8	12.81	40.16	42.01	22.26	27.75	15.57	0.24	0.35	0.42	0.5	3.13	2.12	5.07	5.05	2.6	0.32	0.21	0.11	12.58	21.35	14.11	0.028	0.039	0.061	89.79	50.51	34.83
459	2014-10-19	220	T. clarkei (encrusted)	F0	11.96			1.47			0.027			9.56			0.35			8.94			44.64			0.12			1.92			3.39			0			30.31			0			0
460	2014-10-19	220	T. clarkei (encrusted)	F-1	10.7			1.53			0.031			9.57			1.4			43.25			39.67			0.27			2.64			7.42			0.31			60.37			0.06			40.18
461	2014-10-19	220	T. clarkei (encrusted)	F-2	10.44			1.48			0.036			16.05			0.83			11.4			33.42			0.14			5.27			8.24			0.16			47.57			0.172			14.69
462	2014-10-19	220	T. clarkei (encrusted)	F-3	9.82	10.73	0.9	1.5	1.49	0.02	0.043	0.034	0.007	10.18	11.34	3.15	0.24	0.71	0.53	2.45	16.51	18.22	17.8	33.88	11.66	0.09	0.16	0.08	3.62	3.36	1.45	4.87	5.98	2.25	0	0.12	0.15	41.95	45.05	12.49	0.038	0.067	0.074	47.07	25.49	21.97
463	2014-10-19	340	T. clarkei (big)	F0	12.58			1.69			0.089			22.98			1.36			31.93			32.01			0.3			7.14			7.67			0			45.67			0			67.78
464	2014-10-19	340	T. clarkei (big)	F-1	8.46			1.51			0.077			13.96			0.44			110.29			38.57			0.13			3.93			57.7			0.16			68			0			40.64
465	2014-10-19	340	T. clarkei (big)	F-2	8.03			1.64			0.065			11.01			0.48			8.45			46.85			0.13			3.06			8.32			0.21			69.08			0			51.83
466	2014-10-19	340	T. clarkei (big)	F-3	9.54			1.69			0.064			16.63			0.31			8.82			64.48			0.11			6.28			11.07			0.2			47.86			0			37.24
467	2014-10-19	340	T. clarkei (big)	F-4	8.03	9.33	1.92	1.39	1.58	0.13	0.069	0.073	0.01	14.89	15.89	4.45	0.54	0.63	0.42	4.61	32.82	44.63	67.86	49.95	15.76	0.22	0.18	0.08	6.7	5.42	1.81	6.2	18.19	22.16	0.22	0.16	0.09	45.44	55.21	12.21	0.033	0.007	0.015	45.76	48.65	12.03
468	2014-10-19	340	G. ruber	F0	6.17			1.47			0.074			12.54			0.07			7.75			27.05			0.09			3.72			5.6			0.14			11.98			0.033			23.37
469	2014-10-19	340	G. ruber	F-1	7.56	6.87	0.98	1.53	1.5	0.04	0.077	0.075	0.002	13.67	13.1	0.8	0.3	0.18	0.16	81.56	44.65	52.19	39.42	33.24	8.75	0.41	0.25	0.22	2.28	3	1.02	5.1	5.35	0.35	0.14	0.14	0	10.53	11.25	1.02	0.031	0.032	0.001	66.99	45.18	30.84
470	2014-10-19	450	T. clarkei (big)	F0	6.35			1.62			0.064			9.94			0.2			5.65			16.24			0.08			6.2			6.58			0.17			7.84			0			79.31
471	2014-10-19	450	T. clarkei (big)	F-1	5.9			1.32			0.053			7.88			0.26			10.37			19.79			0.15			4.47			5.06			0.8			8.42			0.013			22.2
472	2014-10-19	450	T. clarkei (big)	F-2	6.64			1.53			0.05			8.69			0.2			9.48			21.15			0.05			3.95			4.06			0.09			7.77			0			33.44
473	2014-10-19	450	T. clarkei (big)	F-3	8.38			1.52			0.059			9.96			0.04			5.49			32.29			0.03			4.22			3.87			0.61			5.4			0.034			42.57
474	2014-10-19	450	T. clarkei (big)	F-4	7.23	6.9	0.96	1.44	1.49	0.11	0.055	0.056	0.006	8.76	9.04	0.89	0.08	0.16	0.1	6.37	7.47	2.28	32.25	24.34	7.46	0.09	0.08	0.05	0.75	3.92	1.98	2.29	4.37	1.58	0.1	0.35	0.33	5.6	7	1.4	0	0.009	0.015	18.04	39.11	24.44
475	2014-10-19	450	T. clarkei (encrusted)	F0	8.45			1.53			0.051			9.35			4.59			63.61			45.35			1.11			5.76			13.63			0.18			28.69			0.022			72.23
476	2014-10-19	450	T. clarkei (encrusted)	F-1	8.21			1.54			0.033			15.31			2.99			72.38			X			0.64			7.59			14.7			0.95			45.33			0.067			134.09
477	2014-10-19	450	T. clarkei (encrusted)	F-2	8.2			1.43			0.046			9.63			1.08			123.49			30.81			0.65			3.13			3.25			0.22			25.16			0.452			84.24
478	2014-10-19	450	T. clarkei (encrusted)	F-3	6.31			1.48			0.041			8.42			0.23			8.29			36.71			0.16			3.15			1.83			0.55			10.38			0.047			38.3
479	2014-10-19	450	T. clarkei (encrusted)	F-4	6.38	7.51	1.07	1.49	1.49	0.04	0.035	0.041	0.008	7.01	9.94	3.17	0.16	1.81	1.93	5.39	54.63	49.27	10.12	30.75	15	0.14	0.54	0.4	1.74	4.27	2.36	2.71	7.22	6.37	0.13	0.4	0.34	5.94	23.1	15.7	0.021	0.122	0.186	20.46	69.86	44.09
480	2014-10-19	450	G. ruber	F0	6.17			1.53			0.06			8.07			0.06			10.65			7.63			0.27			1.48			1.74			0			1.3			0			0
481	2014-10-19	450	G. ruber	F-1	9.53			1.57			0.052			11.99			0.04			4.81			13.39			0.03			4.18			3.37			0.18			1.53			0			58.08
482	2014-10-19	450	G. ruber	F-2	9.38	8.36	1.9	1.62	1.57	0.04	0.053	0.055	0.004	9.05	9.7	2.04	0.74	0.28	0.4	8.64	8.03	2.97	38.76	19.93	16.56	0.26	0.19	0.14	3.6	3.09	1.42	3.47	2.86	0.97	0.51	0.23	0.26	5.14	2.66	2.15	0.026	0.009	0.015	32.99	30.36	29.13
483	2014-10-19	570	T. clarkei (big)	F0	6.63			1.58			0.105			10.59			0.62			19.48			51.55			0.49			0			2.34			0.38			7.06			0			130.43
484	2014-10-19	570	T. clarkei (big)	F-1	6.15			1.61			0.066			8.9			0.12			13.44			27.08			0.14			4.14			1.79			0.22			2.28			0.044			24.52
485	2014-10-19	570	T. clarkei (big)	F-2	6.19			1.56			0.056			8.24			0.12			34.52			5.43			0.04			1.97			0.75			0			1.21			0			46.95
486	2014-10-19	570	T. clarkei (big)	F-3	8.3			1.58			0.037			11.65			0.24			35.5			25.65			0.14			4.7			1.52			0			1.46			0			33.09
487	2014-10-19	570	T. clarkei (big)	F-4	8.1	7.07	1.05	1.31	1.53	0.12	0.056	0.064	0.025	14.91	10.86	2.64	0.08	0.24	0.22	81.39	36.87	26.65	36.45	29.23	16.84	0.11	0.18	0.17	0.82	2.33	2.05	1.77	1.63	0.58	0	0.12	0.17	1.15	2.63	2.52	0	0.009	0.019	31.71	53.34	43.85
488	2014-10-19	570	T. clarkei (encrusted)	F0	8.1			1.49			0.028			9.58			0.61			4.69			22.58			0.6			0			4.83			0.22			8.25			0.065			25.9
489	2014-10-19	570	T. clarkei (encrusted)	F-1	5.94			1.62			0.032			8.82			0.14			37.66			20.71			0.1			4.68			1.64			0			2.82			0			71.51
490	2014-10-19	570	T. clarkei (encrusted)	F-2	5.56			1.61			0.035			6.37			0.17			9.8			8.44			0.19			1.82			1.3			0.21			2.42			0			0
491	2014-10-19	570	T. clarkei (encrusted)	F-3	5.71			1.92			0.039			8.99			0.14			8.89			42.93			0.18			3.79			1.79			0			2.6			0			62.75
492	2014-10-19	570	T. clarkei (encrusted)	F-4	6.04	6.27	1.04	1.48	1.62	0.18	0.029	0.033	0.005	7.77	8.31	1.26	0.17	0.24	0.2	14.37	15.08	13.08	22.48	23.43	12.39	0.38	0.29	0.2	1.75	2.41	1.85	2.81	2.47	1.43	0.27	0.14	0.13	3.62	3.94	2.45	0.047	0.022	0.031	26.35	37.3	29.41
493	2014-10-19	570	G. ruber	F0	10.26			1.6			0.095			9.62			0.05			3.24			30.01			0.09			4.04			2.92			0			5.65			0			59.35
494	2014-10-19	570	G. ruber	F-1	11.06			1.5			0.065			10.89			0.94			35.08			64.54			0.21			4.56			6.15			0.27			13.14			0.031			42.41
495	2014-10-19	570	G. ruber	F-2	15.03	12.12	2.55	1.64	1.58	0.07	0.096	0.085	0.017	19.46	13.32	5.35	X	0.49	0.62	X	19.16	22.51	X	47.28	24.42	3.96	0.15	0.09	3.73	4.11	0.42	6.88	5.32	2.11	0.86	0.38	0.44	15.45	11.41	5.13	0.092	0.041	0.047	69.58	57.11	13.72
496	2014-11-24	570	T. clarkei (encrusted)	F0	14.39			1.31			0.281			58.6			1.26			10.28			19.29			0.32			7.69			14.84			0			25.1			0.093			131.57
497	2014-11-24	570	T. clarkei (encrusted)	F-1	12.21			1.64			0.148			22.54			1.97			40.26			36.8			0.59			9.23			33.29			0.61			58.68			0.069			46.33
498	2014-11-24	570	T. clarkei (encrusted)	F-2	14.17			1.52			0.115			38.81			0.67			26.18			53.39			0.11			0			24.87			0.42			102.47			0.141			63.07
499	2014-11-24	570	T. clarkei (encrusted)	F-3	22.56			1.38			0.23			68.36			1.58			36.42			27.12			0.24			6.05			42.74			0.48			41.14			0.129			77.35
500	2014-11-24	570	T. clarkei (encrusted)	F-4	6.83	14.03	5.66	1.46	1.46	0.13	0.057	0.166	0.09	14.16	40.49	23.04	0.18	1.13	0.71	6.5	23.93	15.15	7.89	28.9	17.31	0.13	0.28	0.19	2.57	5.11	3.78	12.94	25.73	12.54	0	0.3	0.28	26.77	50.83	31.87	0.027	0.092	0.046	41.46	71.96	36.22
501	2014-11-24	120	T. clarkei (big)	F0	7.1			1.49			0.093			18.34			0.59			21.85			59.69			0.23			2.88			22.12			3.09			14.69			0			41.66
502	2014-11-24	120	T. clarkei (big)	F-1	5.97			1.42			0.049			12.28			2			26.94			45.75			0.29			3.08			7.2			0.43			6			0.059			37.81
503	2014-11-24	120	T. clarkei (big)	F-2	6.85			1.47			0.068			12.19			0.37			8.74			49.3			0.08			3.67			14.81			0			8.61			0			41.79
504	2014-11-24	120	T. clarkei (big)	F-3	8.09			1.46			0.061			21.51			1.11			11.64			65.15			0.24			4.48			28.22			0.29			13.94			0.017			88.46
505	2014-11-24	120	T. clarkei (big)	F-4	13.76	8.36	3.12	1.48	1.47	0.03	0.082	0.071	0.017	40.58	20.98	11.67	1.38	1.09	0.65	33.07	20.45	10.22	47.65	53.51	8.46	0.08	0.19	0.1	1.55	3.13	1.08	23.89	19.25	8.29	0.85	0.93	1.25	23.45	13.34	6.72	0.059	0.027	0.03	139.95	69.94	44.35
506	2014-11-24	120	T. clarkei (encrusted)	F0	7.94			1.51			0.038			13.97			0.15			0			14.85			0.03			5.55			13.62			0			8.38			0			0
507	2014-11-24	120	T. clarkei (encrusted)	F-1	7.48			1.47			0.049			10.39			0.24			4.78			40.06			0.2			6.08			29.49			0			8.42			0			0
508	2014-11-24	120	T. clarkei (encrusted)	F-2	11.47			1.51			0.018			33.59			0.64			9.08			27.26			0.18			6.26			12.34			0.22			6.34			0.069			42.67
509	2014-11-24	120	T. clarkei (encrusted)	F-3	5.91	8.2	2.35	1.43	1.48	0.04	0.04	0.036	0.013	9.13	16.77	11.4	0.2	0.31	0.23	1.57	3.86	4.01	27.96	27.53	10.29	0.08	0.12	0.08	2.09	4.99	1.96	14.28	17.43	8.08	0.13	0.09	0.11	9.2	8.09	1.22	0	0.017	0.034	74.58	29.31	36.27
510	2014-11-24	120	G. ruber	F0	3.91			1.42			0.05			7.45			1			29.69			10.72			2.32			3.85			2.06			0.2			1.68			0.084			49.3
511	2014-11-24	120	G. ruber	F-1	4.03			1.47			0.059			7.54			0.06			8.03			11.67			0.1			3.66			1.24			0.14			2.26			0			31.09
512	2014-11-24	120	G. ruber	F-2	3.76	3.9	0.14	1.44	1.45	0.02	0.055	0.054	0.005	8.08	7.69	0.34	0.04	0.37	0.55	2.22	13.31	14.48	11.13	11.17	0.48	0.12	0.85	1.28	3.56	3.69	0.14	2.91	2.07	0.83	0	0.11	0.1	1.06	1.67	0.6	0	0.028	0.049	0	26.8	24.93
513	2014-11-24	220	G. ruber	F0	6.71			1.34			0.046			9.46			0.07			2.45			6.91			0			1.45			4.8			0			1.21			0			0
514	2014-11-24	220	G. ruber	F-1	8.47			2.27			0.062			14.33			0.15			10.9			12.33			0.11			2.77			5.22			0.15			1.99			0.02			41.78
515	2014-11-24	220	G. ruber	F-2	7.22	7.47	0.91	1.61	1.74	0.48	0.06	0.056	0.008	10.7	11.5	2.53	0.07	0.1	0.05	2.05	5.14	5	5.11	8.12	3.76	0.08	0.06	0.06	2.02	2.08	0.66	4.82	4.94	0.24	0.17	0.11	0.09	2.83	2.01	0.81	0.011	0.01	0.01	34.03	25.27	22.23
516	2014-11-24	340	T. clarkei (big)	F0	6.13			1.5			0.057			12.27			0.18			109.77			41.11			0.14			4.33			17.92			0.08			13.17			0.027			66.13
517	2014-11-24	340	T. clarkei (big)	F-1	5.31			1.51			0.055			10.98			0.12			8.55			45.8			0.06			3.09			14.1			0			11.14			0			56.35
518	2014-11-24	340	T. clarkei (big)	F-2	5.63			1.44			0.053			12.82			0.37			7.49			54.47			0.2			2.2			16.51			0.42			15.66			0.016			53.09
519	2014-11-24	340	T. clarkei (big)	F-3	7.94			1.54			0.049			10.89			4.03			203.03			68.3			0.85			5.64			17.21			1.06			17.44			0.091			107.14
520	2014-11-24	340	T. clarkei (big)	F-4	6.65	6.33	1.03	1.41	1.48	0.05	0.063	0.055	0.005	10.31	11.45	1.05	8.75	2.69	3.77	119.53	89.68	82.89	40.84	50.1	11.57	1.05	0.46	0.46	7.2	4.49	1.99	14.02	15.95	1.8	0.19	0.35	0.43	11.79	13.84	2.65	0.036	0.034	0.035	89.68	74.47	23.2
521	2014-11-24	340	T. clarkei (encrusted)	F0	6.61			1.5			0.045			7.35			1.42			100.32			7.45			0.9			1.05			3.82			0.36			5.21			X			20.7
522	2014-11-24	340	T. clarkei (encrusted)	F-1	6.87			1.5			0.029			9.93			0.19			5.7			24.09			0.09			2			4.56			0.11			14.61			0			47.07
523	2014-11-24	340	T. clarkei (encrusted)	F-2	6.87			1.66			0.027			8.37			0.39			32.72			9.17			0.17			0			3.18			0			10.57			0.024			0
524	2014-11-24	340	T. clarkei (encrusted)	F-3	6.37	6.68	0.24	1.58	1.56	0.08	0.045	0.037	0.01	9.06	8.68	1.09	0.18	0.54	0.59	6.12	36.22	44.57	13.12	13.46	7.48	0.05	0.3	0.4	3.1	1.54	1.32	1.98	3.39	1.09	0	0.12	0.17	6.73	9.28	4.21	0	0.008	0.014	54.96	30.68	25.16
525	2014-11-24	340	G. ruber	F0	4.21			1.69			0.051			7.72			0.02			3.83			5.05			0.07			5.51			0.73			0			0.98			0			23.65
526	2014-11-24	340	G. ruber	F-1	5.95			1.53			0.06			10.36			0.22			7.95			6.88			0.08			1.9			3.89			0.11			3.31			0			31.48
527	2014-11-24	340	G. ruber	F-2	6.74	5.63	1.29	1.48	1.57	0.11	0.08	0.064	0.015	14.59	10.89	3.46	0.06	0.1	0.11	10.32	7.37	3.28	24.43	12.12	10.7	0.08	0.08	0	3.33	3.58	1.82	4.53	3.05	2.03	0.21	0.1	0.1	2.96	2.42	1.26	0	0	0	51.59	35.57	14.41
528	2014-11-24	450	T. clarkei (big)	F0	21.27			1.68			0.114			77.88			3.33			54.04			110.26			1.29			5.17			26.52			0.19			19.93			0.046			119.21
529	2014-11-24	450	T. clarkei (big)	F-1	11.24			1.43			0.086			17.5			0.49			1.88			64.78			0.29			4.01			29.58			0.33			18.94			0.03			67.25
530	2014-11-24	450	T. clarkei (big)	F-2	8.42			1.62			0.067			13.23			0.14			14.36			57.77			0.04			3.79			12.68			0			14.06			0.011			61.55
531	2014-11-24	450	T. clarkei (big)	F-3	5.74			1.21			0.044			11.04			0.28			3.1			64.35			0.14			0.22			13.08			0.22			15.97			0			67.66
532	2014-11-24	450	T. clarkei (big)	F-4	19.18	13.17	6.77	2.21	1.63	0.37	0.097	0.082	0.027	27.6	29.45	27.81	1.78	1.2	1.36	10.09	16.69	21.49	110.4	81.51	26.45	0.31	0.41	0.5	0.9	2.82	2.14	51.32	26.64	15.78	0.36	0.22	0.14	21.84	18.15	3.12	0.021	0.022	0.018	43.5	71.83	28.25
533	2014-11-24	450	T. clarkei (encrusted)	F0	6.71			1.39			0.025			10.56			0.51			1.63			9.5			0.29			4.05			5.73			0.17			4.56			0.019			49.89
534	2014-11-24	450	T. clarkei (encrusted)	F-1	6.68			1.55			0.023			12.28			0.97			123.9			12.58			0.31			0.41			3.31			0			5.32			0			26.79
535	2014-11-24	450	T. clarkei (encrusted)	F-2	5.58			1.42			0.015			9.71			0.09			3.84			12.35			0.07			5.9			3.65			0.16			7.87			0.045			0
536	2014-11-24	450	T. clarkei (encrusted)	F-3	4.91			1.26			0.034			6.98			0.06			2.92			8.99			0.09			3.63			2.84			0.07			2.75			0			9.35
537	2014-11-24	450	T. clarkei (encrusted)	F-4	9.81	6.74	1.88	1.42	1.41	0.1	0.052	0.03	0.014	18.26	11.56	4.21	1.76	0.68	0.71	56.05	37.67	53.44	86.94	26.07	34.06	0.78	0.31	0.29	0	2.8	2.52	5.5	4.2	1.32	0	0.08	0.08	6.65	5.43	1.96	0.054	0.024	0.025	45.87	26.38	21.9
538	2014-11-24	450	G. ruber	F0	10.51			1.53			0.058			15.02			0.19			10.45			55.84			0.11			2.77			8.74			0			19.16			0			37.31
539	2014-11-24	450	G. ruber	F-1	6.94			1.37			0.104			11.77			0.39			31.81			38.18			0.19			4.43			4.22			0			7.2			0.022			28.6
540	2014-11-24	450	G. ruber	F-2	6.51	7.99	2.2	1.41	1.44	0.08	0.07	0.077	0.024	10.41	12.4	2.37	0.62	0.4	0.21	39.16	27.14	14.91	48.64	47.56	8.88	0.21	0.17	0.05	3	3.4	0.9	2.84	5.27	3.09	0.18	0.06	0.1	10.56	12.31	6.17	0.017	0.013	0.012	34.42	33.44	4.44
541	2014-11-24	570	T. clarkei (big)	F0	7.07			1.73			0.073			13.94			1.95			71.11			42.88			0.41			4.81			9.51			0.16			7.32			0.038			85.64
542	2014-11-24	570	T. clarkei (big)	F-1	5.53			1.35			0.063			14.75			0.69			10.18			28.82			0.23			2.24			7.89			0.19			5.43			0.088			67
543	2014-11-24	570	T. clarkei (big)	F-2	9.46			1.48			0.064			26.76			1.1			34.25			27.38			0.48			3.51			11.58			0.34			5.42			0.018			118.68
544	2014-11-24	570	T. clarkei (big)	F-3	5.44			1.3			0.063			11			0.18			7.83			32.15			0.1			2.77			6.69			0			3.93			0.017			30.63
545	2014-11-24	570	T. clarkei (big)	F-4	5.44	6.59	1.75	1.36	1.44	0.17	0.048	0.062	0.009	11.01	15.49	6.52	0.11	0.8	0.76	3.6	25.39	28.21	31.01	32.45	6.12	0.07	0.26	0.18	2.19	3.1	1.09	10.8	9.3	2.02	0	0.14	0.14	6.72	5.77	1.32	0.035	0.039	0.029	30.29	66.45	37.71
546	2014-11-24	570	G. ruber	F0	5.04			1.51			0.05			10.14			0			8.76			7.44			0.11			4.28			2.84			0			4.23			0.047			35.05
547	2014-11-24	570	G. ruber	F-1	6.77			1.45			0.06			10.97			0.18			10.13			23.96			0.11			2.98			5.86			0.2			11.33			0.017			29.09
548	2014-11-24	570	G. ruber	F-2	6.48	6.1	0.93	1.49	1.48	0.03	0.05	0.053	0.006	9.63	10.25	0.67	0.03	0.11	0.11	3.05	7.31	3.75	26.67	19.36	10.41	0.05	0.09	0.04	3.45	3.57	0.66	5.52	4.74	1.65	0.15	0.12	0.1	9.72	8.43	3.72	0.022	0.029	0.016	52.02	38.72	11.9
549	2014-12-20	120	G. ruber	F0	5.49			1.51			0.067			10.19			0.13			7.41			15.95			0.12			2.98			21.01			1.53			58.26			0.023			56.12
550	2014-12-20	120	G. ruber	F-1	9.91			1.49			0.086			11.36			0.15			6.51			10.25			0.09			6.63			19.05			0			43.83			0.014			39.99
551	2014-12-20	120	G. ruber	F-2	7.73	7.71	2.21	1.39	1.46	0.06	0.109	0.087	0.021	10.19	10.58	0.67	0.1	0.13	0.02	6.21	6.71	0.63	12.03	12.74	2.91	0.09	0.1	0.02	10.41	6.67	3.71	21.51	20.52	1.3	0.19	0.57	0.83	47.07	49.72	7.57	0.01	0.015	0.007	35.36	43.82	10.9
552	2014-12-20	220	T. clarkei (big)	F0	5.95			1.48			0.025			9.87			1.24			45.49			24.19			0.78			3.87			23.9			0.89			35.06			0.032			112.02
553	2014-12-20	220	T. clarkei (big)	F-1	9.07			1.47			0.033			15.97			0.94			37.3			50.98			0.37			4.15			15.13			0.14			23.96			0.035			54.78
554	2014-12-20	220	T. clarkei (big)	F-2	7.25			1.54			0.033			11.81			0.29			0.69			30.54			0.16			5.52			8.94			0.16			16.62			0.011			55.38
555	2014-12-20	220	T. clarkei (big)	F-3	7.81			1.5			0.025			9.89			0.19			6.67			31.82			0.19			6.29			15.1			0.27			21.14			0			59.89
556	2014-12-20	220	T. clarkei (big)	F-4	10.05	8.03	1.59	1.43	1.48	0.04	0.035	0.03	0.005	16.5	12.81	3.23	X	0.66	0.51	14.73	20.97	19.51	76.13	42.73	21.19	0.92	0.49	0.35	10.13	5.99	2.51	13.27	15.27	5.44	0.23	0.34	0.31	22.37	23.83	6.84	0.049	0.025	0.02	77.12	71.84	24.22
557	2014-12-20	220	T. clarkei (encrusted)	F0	8.24			1.5			0.035			10.88			0.24			6.73			7.3			0.14			4.08			9.38			0.2			17.84			0.026			68.45
558	2014-12-20	220	T. clarkei (encrusted)	F-1	11.64			1.69			0.029			15.24			0.21			2.16			9.57			0.09			8.85			15.81			0.44			28.25			0			95.66
559	2014-12-20	220	T. clarkei (encrusted)	F-2	10.35			1.67			0.027			14.61			0.68			4.49			18.16			0.47			0			12.42			0.35			17.73			0.022			35.81
560	2014-12-20	220	T. clarkei (encrusted)	F-3	6.98			2.37			0.036			12.45			0.38			16.12			22.98			0.29			6.46			8.9			2.99			13.43			0			50.9
561	2014-12-20	220	T. clarkei (encrusted)	F-4	8.08	9.06	1.89	1.67	1.78	0.34	0.033	0.032	0.004	14.64	13.56	1.84	0.79	0.46	0.26	15.49	9	6.43	13.67	14.34	6.36	0.25	0.25	0.15	0.56	3.99	3.79	7.35	10.77	3.36	1.9	1.18	1.22	16.8	18.81	5.57	0.02	0.014	0.013	55.61	61.29	22.48
562	2014-12-20	220	G. ruber	F0	7.29			1.42			0.054			12.62			0.11			21.34			10.12			0.12			7.87			5.96			1.2			17.54			0.097			61.7
563	2014-12-20	220	G. ruber	F-1	7.79			1.42			0.052			8.97			0.42			22.63			20.36			0.2			1.85			6.06			0.65			21.41			0.096			194.67
564	2014-12-20	220	G. ruber	F-2	7.37	7.48	0.27	1.42	1.42	0	0.047	0.051	0.004	8.78	10.12	2.17	0.29	0.28	0.16	4.86	16.28	9.91	14.28	14.92	5.15	0.07	0.13	0.07	10.22	6.65	4.31	6.36	6.13	0.21	0	0.62	0.6	19.05	19.33	1.95	0.014	0.069	0.048	44.69	100.35	82.12
565	2014-12-20	340	T. clarkei (big)	F0	9.62			1.6			0.065			15.85			0.47			8.08			14.94			0.33			4.87			3.28			0.69			3.33			0			50.91
566	2014-12-20	340	T. clarkei (big)	F-1	4.41			1.54			0.061			9.22			0.17			9.05			8.69			0.33			16.55			1.56			0.51			1.03			0.032			0
567	2014-12-20	340	T. clarkei (big)	F-2	5.6			1.64			0.053			9.74			0.13			28.19			14.85			0.12			1.39			3.98			0.2			1.65			0.019			31.49
568	2014-12-20	340	T. clarkei (big)	F-3	4.22			1.54			0.046			8.55			0.38			19.05			1.61			0.07			0			1.74			0			0.95			0.008			54.57
569	2014-12-20	340	T. clarkei (big)	F-4	4.65	5.7	2.25	1.47	1.56	0.07	0.054	0.056	0.007	9.54	10.58	2.98	0.13	0.26	0.16	10.21	14.92	8.61	9.26	9.87	5.49	0.03	0.17	0.14	0	4.56	6.99	1.97	2.51	1.07	0.23	0.33	0.27	1.51	1.69	0.96	0	0.012	0.014	0	27.39	26.5
570	2014-12-20	340	T. clarkei (encrusted)	F0	9.54			1.55			0.014			9.5			0.31			11.52			10.85			0.15			6.99			2.98			0.26			1.99			0.044			36.34
571	2014-12-20	340	T. clarkei (encrusted)	F-1	8.03			1.38			0.018			11.05			0.1			8.18			6.9			0.08			4.77			4.4			0			1.69			0.03			40.76
572	2014-12-20	340	T. clarkei (encrusted)	F-2	8.05			1.41			0.036			7.97			0.1			10.6			4.68			0.01			3.98			2.43			0			1.62			0			30.96
573	2014-12-20	340	T. clarkei (encrusted)	F-3	9.16			1.57			0.02			9.13			0.14			6.88			12.2			0.07			5.38			2.65			0.18			1.01			0			20.87
574	2014-12-20	340	T. clarkei (encrusted)	F-4	8.96	8.75	0.68	1.58	1.5	0.09	0.018	0.021	0.009	9.64	9.46	1.1	0.2	0.17	0.09	21.51	11.74	5.77	6.78	8.28	3.13	0.13	0.09	0.05	1.75	4.57	1.93	3.6	3.21	0.8	0.21	0.13	0.12	1.92	1.65	0.39	0.053	0.025	0.025	43.02	34.39	8.85
575	2014-12-20	340	G. ruber	F0	5.05			1.42			0.074			9.08			1.29			65.5			9.88			0.37			1.56			3.13			0			2.34			0.025			44.78
576	2014-12-20	340	G. ruber	F-1	9.24			1.46			0.091			10.73			8.9			X			X			2.04			7.86			5.17			0.65			4.84			0.038			50.08
577	2014-12-20	340	G. ruber	F-2	5.66	6.65	2.26	1.41	1.43	0.03	0.079	0.081	0.009	10.03	9.95	0.82	0.23	0.76	0.75	9.34	37.42	39.71	9.4	9.64	0.34	0.1	0.84	1.05	5.88	5.1	3.22	2	3.43	1.61	0	0.22	0.38	0.84	2.67	2.02	0	0.021	0.019	50.45	48.44	3.17
578	2014-12-20	450	T. clarkei (big)	F-1	5.91			1.5			0.024			9.19			1.69			74.1			36.7			0.58			3.95			9.71			0.18			17.03			0.026			65.26
579	2014-12-20	450	T. clarkei (big)	F-2	4.81			1.5			0.022			9.48			0.15			3.72			24.8			0.26			2.83			9.2			0.11			17.85			0.029			37.51
580	2014-12-20	450	T. clarkei (big)	F-3	4.83			1.42			0.026			8.61			0.43			31.42			47			0.39			3.2			17.25			0.53			41.56			0.017			55.6
581	2014-12-20	450	T. clarkei (big)	F-4	7.2	5.69	1.13	1.66	1.52	0.1	0.021	0.023	0.002	17.08	11.09	4.01	8.85	0.76	0.82	28.6	34.46	29.21	47.26	38.94	10.63	0.76	0.5	0.22	0.37	2.59	1.55	19.98	14.04	5.41	0.17	0.25	0.19	37.63	28.52	12.9	0.022	0.024	0.006	38.6	49.24	13.52
582	2014-12-20	450	T. clarkei (encrusted)	F0	7.89			1.53			0.035			8.63			0.85			5.96			33.8			0.29			0			22.09			0.13			26.4			0			41.16
583	2014-12-20	450	T. clarkei (encrusted)	F-1	X			1.64			0.06			58.47			0.91			28.07			32.49			0.28			12.11			39.59			0.24			34.88			0.414			188.43
584	2014-12-20	450	T. clarkei (encrusted)	F-2	12.01			1.5			0.04			16.03			1.22			59.3			32.74			0.74			9.4			39.92			0.2			32.74			0.032			56.55
585	2014-12-20	450	T. clarkei (encrusted)	F-3	7.71			1.49			0.035			16.44			0.51			4.91			45.06			0.29			11.7			12.09			0			23.07			0.038			67.43
586	2014-12-20	450	T. clarkei (encrusted)	F-4	8.58	9.05	2.01	1.55	1.54	0.06	0.03	0.04	0.012	14.47	22.81	20.18	0.44	0.79	0.32	129.97	45.64	52.06	14.85	31.79	10.82	0.32	0.38	0.2	1.86	7.02	5.69	19.55	26.65	12.52	0.22	0.16	0.1	11.96	25.81	9.08	0.041	0.105	0.173	71.02	84.92	59.02
587	2014-12-20	450	G. ruber	F0	5.68			1.45			0.057			13.44			0.92			19.79			31.78			0.39			13.43			11.63			0.4			9.14			0.033			61.01
588	2014-12-20	450	G. ruber	F-1	8.29			1.58			0.066			15.78			0.62			20.64			28.47			0.13			11.55			7.26			0.2			4.14			0.021			58.98
589	2014-12-20	450	G. ruber	F-2	6.96	6.98	1.31	1.46	1.49	0.07	0.069	0.064	0.006	9.53	12.92	3.16	0.29	0.61	0.32	2.14	14.19	10.44	17.56	25.94	7.44	0.1	0.21	0.16	5.14	10.04	4.34	3.15	7.35	4.24	0.52	0.37	0.16	3.78	5.69	3	0	0.018	0.017	47.89	55.96	7.06
590	2014-12-20	570	T. clarkei (encrusted)	F-1	4.06			1.36			0.031			7.54			0.03			4			3.3			0.08			6.97			1.8			0.34			0.49			0.022			0
591	2014-12-20	570	T. clarkei (encrusted)	F-2	4.72			1.55			0.047			8.18			0.12			25.92			8.33			0.05			8.97			1.86			0.19			0.31			0.028			34.24
592	2014-12-20	570	T. clarkei (encrusted)	F-3	6.37			1.67			0.032			10.25			0.48			11.39			11.34			0.21			0			5.87			0.15			0.89			0.022			22.74
593	2014-12-20	570	T. clarkei (encrusted)	F-4	7.13	5.57	1.42	1.5	1.52	0.13	0.022	0.033	0.01	11.74	9.43	1.92	0.93	0.39	0.41	9.98	12.82	9.3	13.75	9.18	4.5	0.27	0.15	0.1	2.58	4.63	4.08	11.1	5.16	4.39	0.54	0.31	0.18	2.02	0.92	0.77	0.032	0.026	0.005	42.08	24.77	18.32
594	2014-12-20	570	T. clarkei (big)	F0	4.54			1.61			0.021			9.28			0.03			8.45			5.86			0.1			5.11			4.36			0.18			1.12			0.03			34.57
595	2014-12-20	570	T. clarkei (big)	F-1	7.76			1.45			0.046			23.69			3.82			42.9			55.36			1.62			20.98			37.77			0.23			0.96			0.087			94.22
596	2014-12-20	570	T. clarkei (big)	F-2	5.37			1.47			0.048			10.04			0.12			21.9			16.54			1.04			3.19			7.87			0.13			0.66			0			36.29
597	2014-12-20	570	T. clarkei (big)	F-3	6.56			1.44			0.031			13.17			0.53			11.79			7.73			0.07			2.59			5.81			0.5			0.89			0.016			22.29
598	2014-12-20	570	T. clarkei (big)	F-4	4.81	5.81	1.34	1.51	1.5	0.07	0.02	0.033	0.013	7.69	12.78	6.42	0.07	0.91	1.64	4.82	17.97	15.32	8.06	18.71	20.9	0.08	0.58	0.72	6	7.58	7.62	2.49	11.66	14.73	0	0.21	0.18	0.26	0.78	0.33	0	0.027	0.036	39.52	45.38	28.08
599	2014-12-20	570	T. clarkei (encrusted)	F0	7.21	7.21	0	1.54	1.54	0	0.031	0.031	0	10.59	10.59	0	0.5	0.5	0	96.34	96.34	0	49.27	49.27	0	0.23	0.23	0	11.45	11.45	0	20.45	20.45	0	0.33	0.33	0	0.77	0.77	0	0.109	0.109	0	0	0	0
600	2014-12-20	570	G. ruber	F0	8.01			1.45			0.027			8.9			0.09			9.25			8.86			0.11			5.65			4.02			0.25			1.03			0.035			30.59
601	2014-12-20	570	G. ruber	F-1	9.69			1.45			0.067			11.57			0.01			6.92			12.49			0.11			2.63			4.01			0			0.34			0			52.35
602	2014-12-20	570	G. ruber	F-2	7.91	8.54	1	1.45	1.45	0	0.076	0.057	0.026	10.26	10.24	1.34	0.01	0.04	0.05	5.92	7.36	1.71	6.4	9.25	3.06	0.07	0.09	0.02	2.34	3.54	1.83	1.95	3.32	1.19	0.13	0.13	0.12	0.29	0.55	0.41	0	0.012	0.02	40.7	41.21	10.89
603	NA (core top)	750	T. clarkei (big)	F0	7.55			1.21			0.092			8.19			5.47			119.68			258.63			0.91			2.36			8.03			1.53			1.32			0.079			37.12
604	NA (core top)	750	T. clarkei (big)	F-1	11.08			1.37			0.137			10.67			5.41			102.08			703.84			1.62			2.9			27.91			0.79			1.83			0.217			80.36
605	NA (core top)	750	T. clarkei (big)	F-2	9.82			1.42			0.132			21.81			6.64			222.56			534.16			2.83			3.01			59.95			1.17			1.53			0.302			57.84
606	NA (core top)	750	T. clarkei (big)	F-3	11.63			1.64			0.123			11.4			10.94			303.81			794.13			3.99			3.43			30.9			0.9			4.85			0.277			158
607	NA (core top)	750	T. clarkei (big)	F-4	14.72	10.96	2.62	1.69	1.47	0.2	0.289	0.155	0.077	13.18	13.05	5.21	17.86	9.26	5.31	376.34	224.89	117.6	793.72	616.9	226.63	5.3	2.93	1.77	2.67	2.87	0.4	26.29	30.61	18.69	1.29	1.14	0.3	3.21	2.55	1.48	0.122	0.199	0.097	73.53	81.37	45.95
608	NA (core top)	750	T. clarkei (encrusted)	F0	6.42			1.38			0.079			9.83			3.46			82.58			10.82			0.8			1.95			6.96			0.76			1.19			0.052			70.29
609	NA (core top)	750	T. clarkei (encrusted)	F-1	5.43			1.5			0.14			10.3			2.59			50.12			21.13			4.65			3.65			26.3			0.55			0.89			0.128			76.44
610	NA (core top)	750	T. clarkei (encrusted)	F-2	4.61			1.51			0.142			7.82			0.35			136.61			7.76			0.13			2.86			4.08			0.38			0.23			0.045			27.43
611	NA (core top)	750	T. clarkei (encrusted)	F-3	5.04	5.38	0.77	1.53	1.48	0.07	0.044	0.101	0.048	8.25	9.05	1.2	0.67	1.77	1.5	35.1	76.1	44.94	7.49	11.8	6.4	0.28	1.46	2.14	1.02	2.37	1.14	3.69	10.26	10.79	0.32	0.5	0.2	0.12	0.61	0.52	0	0.056	0.053	44.34	54.62	22.85
612	NA (core top)	750	G. ruber	F0	10.53			1.54			0.159			11.28			9.58			351.5			302.82			3.44			3.69			11.35			1.5			2.01			0.111			79.35
613	NA (core top)	750	G. ruber	F-1	4			1.52			0.141			9.46			0.75			89.86			71.31			0.22			2.12			2.27			0.45			0.33			0.023			133.23
614	NA (core top)	750	G. ruber	F-2	6.25	6.93	3.32	1.58	1.55	0.03	0.147	0.149	0.009	10.73	10.49	0.93	5.16	5.16	4.41	144.92	195.43	137.94	183.89	186	115.77	2.3	1.99	1.63	2.39	2.73	0.84	5.28	6.3	4.62	0.84	0.93	0.53	4.2	2.18	1.94	0.11	0.081	0.05	85.01	99.2	29.61
