# Supplementary material for: Monthly element ∕ Ca trends and inter chamber variability in two planktic Foraminifera species: Globigerinoides ruber albus and Turborotalita clarkei from a hypersaline oligotrophic sea
Source: Copernicus journal article supplement (doi:10.5194/bg-23-1065-2026), 2026-02-05
Supplement: Supplementary file [file bg-23-1065-2026-supplement-title-page.pdf › bg-23-1065-2026-supplement-title-page.pdf]

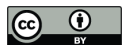

*Supplement of*

**Monthly element / Ca trends and inter chamber variability in two planktic Foraminifera species: *Globigerinoides ruber albus* and *Turborotalita clarkei* from a hypersaline oligotrophic sea**

Noy Levy et al.

Correspondence to: Noy Levy (noy.levy2@mail.huji.ac.il)

- bg-23-1065-2026-supplement-title-page.pdf
- Levy et al., Supplementary file\_A.pdf
- Levy et al., Supplementary tables\_B.xlsx

The copyright of individual parts of the supplement might differ from the article licence.
